# Supplementary material for: Proteome Landscape during Ripening of Solid Endosperm from Two Different Coconut Cultivars Reveals Contrasting Carbohydrate and Fatty Acid Metabolic Pathway Modulation
Source: MDPI journal article supplement (doi:10.3390/ijms241310431), 2023-06-21
Supplement: s1 [file s1]

**Table S2.** Gene ontology enrichment and clustering of identified proteins in both Yucatan green dwarf (YGD) and Mexican pacific tall (MPT) (Core) or exclusively in YGD or MPT. For this analysis we used *Arabidopsis* protein homologs.

## Core

# WARNING - This exported Revigo data is only useful for the specific purpose of constructing a TreeMap visualization.

# Do not use this table as a general list of non-redundant GO categories, as it sets an extremely permissive

# threshold to detect redundancies ( $c=0.10$ ) and fill the 'representative' column, while normally  $c \geq 0.4$  is recommended.

# To export a reduced-redundancy set of GO terms, go to the Scatterplot or Table tab, and export from there.

| TermID     | Name                                                        | Frequency | Value  | Uniqueness | Dispensability | Representative     |
|------------|-------------------------------------------------------------|-----------|--------|------------|----------------|--------------------|
| GO:0000226 | microtubule cytoskeleton organization                       | 0.340003  | 1.3678 | 0.988612   | 0.01040522     | null               |
| GO:0000278 | mitotic cell cycle                                          | 0.386399  | 1.3678 | 0.988494   | 0.01052856     | null               |
| GO:0005975 | carbohydrate metabolic process                              | 5.826191  | 2.1907 | 0.933809   | 0.09069475     | null               |
| GO:0006096 | glycolytic process                                          | 0.532551  | 22.149 | 0.648503   | 0              | null               |
| GO:0006108 | malate metabolic process                                    | 0.054243  | 2.3475 | 0.884456   | 0.35081898     | glycolytic process |
| GO:0010499 | proteasomal ubiquitin-independent protein catabolic process | 0.008394  | 6.7258 | 0.843223   | 0.37012795     | glycolytic process |
| GO:0030388 | fructose 1,6-bisphosphate metabolic process                 | 0.012265  | 1.209  | 0.90986    | 0.36108737     | glycolytic process |
| GO:0006457 | protein folding                                             | 1.03808   | 12.777 | 0.987502   | 0.01158996     | null               |
| GO:0006734 | NADH metabolic process                                      | 0.056712  | 1.4374 | 0.972475   | 0.0311262      | null               |
| GO:0007017 | microtubule-based process                                   | 0.798415  | 1.9585 | 0.987781   | 0.01208936     | null               |

|            |                                                |          |        |          |            |                         |
|------------|------------------------------------------------|----------|--------|----------|------------|-------------------------|
| GO:0015977 | carbon fixation                                | 0.050302 | 1.2859 | 0.96267  | 0.04453891 | null                    |
| GO:0015979 | photosynthesis                                 | 0.217587 | 1.4538 | 0.948841 | 0.06099619 | null                    |
| GO:0045454 | cell redox homeostasis                         | 0.177877 | 2.7017 | 0.982087 | 0.00982244 | null                    |
| GO:0032889 | regulation of vacuole fusion, non-autophagic   | 0.000623 | 1.8008 | 0.992874 | 0.13563283 | cell redox homeostasis  |
| GO:0046686 | response to cadmium ion                        | 0.008823 | 41.215 | 0.804765 | 0          | null                    |
| GO:0009408 | response to heat                               | 0.171454 | 5.7167 | 0.767998 | 0.21152305 | response to cadmium ion |
| GO:0009615 | response to virus                              | 0.170613 | 1.7198 | 0.85991  | 0.26069386 | response to cadmium ion |
| GO:0046685 | response to arsenic-containing substance       | 0.01847  | 1.0885 | 0.815745 | 0.35730895 | response to cadmium ion |
| GO:0051085 | chaperone cofactor-dependent protein refolding | 0.016725 | 8.2175 | 0.961239 | 0.00815552 | null                    |

## Only Yucatan green dwarf (YGD)

# WARNING - This exported Revigo data is only useful for the specific purpose of constructing a TreeMap visualization.  
# Do not use this table as a general list of non-redundant GO categories, as it sets an extremely permissive  
# threshold to detect redundancies (c=0.10) and fill the 'representative' column, while normally c>=0.4 is recommended.  
# To export a reduced-redundancy set of GO terms, go to the Scatterplot or Table tab, and export from there.

| TermID     | Name                            | Frequency | Value   | Uniqueness | Dispensability | Representative |
|------------|---------------------------------|-----------|---------|------------|----------------|----------------|
| GO:0001558 | regulation of cell growth       | 0.07213   | 1.28418 | 10.988     | 0              | null           |
| GO:0006457 | protein folding                 | 1.03808   | 7.60033 | 233745     | 0              | null           |
| GO:0006633 | fatty acid biosynthetic process | 0.75035   | 3.28483 | 0.74744286 | 0.01201001     | null           |

|        |                                                                       |       |      |       |        |                      |
|--------|-----------------------------------------------------------------------|-------|------|-------|--------|----------------------|
| GO:000 |                                                                       | 0.037 | -    | 0.851 |        | fatty acid           |
| 9298   | GDP-mannose biosynthetic process                                      | 38    | 1.75 | 71838 | 0.2499 | biosynthetic process |
|        |                                                                       |       | 374  | 8     | 6828   |                      |
| GO:000 |                                                                       | 0.069 | -    |       |        |                      |
| 6890   | retrograde vesicle-mediated transport, Golgi to endoplasmic reticulum | 58    | 1.00 | 1     | 0      | null                 |
|        |                                                                       |       |      | 0.988 |        |                      |
| GO:000 |                                                                       | 0.798 | 1.06 | 47352 | 0.0120 |                      |
| 7017   | microtubule-based process                                             | 42    | 986  | 5     | 8936   | null                 |
| GO:000 |                                                                       | 0.021 | -    |       |        |                      |
| 9793   | embryo development ending in seed dormancy                            | 3     | 2.00 | 1     | 0      | null                 |
|        |                                                                       |       |      | 0.931 |        |                      |
| GO:004 |                                                                       | 0.092 | 3.93 | 44712 | 0.0098 |                      |
| 2026   | protein refolding                                                     | 36    | 554  | 1     | 3271   | null                 |
|        |                                                                       |       |      | 0.788 |        |                      |
| GO:004 |                                                                       | 0.008 | 17.5 | 62100 |        |                      |
| 6686   | response to cadmium ion                                               | 82    | 331  | 6     | 0      | null                 |
|        |                                                                       |       |      | 0.777 |        |                      |
| GO:000 |                                                                       | 0.171 | 7.92 | 93993 | 0.2115 | response to          |
| 9408   | response to heat                                                      | 45    | 082  | 7     | 2305   | cadmium ion          |
|        |                                                                       |       |      | 0.855 |        |                      |
| GO:000 |                                                                       | 0.170 | 2.20 | 65905 | 0.2606 | response to          |
| 9615   | response to virus                                                     | 61    | 337  | 1     | 9386   | cadmium ion          |

## Only Mexican pacific tall (MPT)

# WARNING - This exported Revigo data is only useful for the specific purpose of constructing a TreeMap visualization.

# Do not use this table as a general list of non-redundant GO categories, as it sets an extremely permissive

# threshold to detect redundancies ( $c=0.10$ ) and fill the 'representative' column, while normally  $c \geq 0.4$  is recommended.

# To export a reduced-redundancy set of GO terms, go to the Scatterplot or Table tab, and export from there.

| TermID  | Name                                      | Frequency | Value | Uniqueness | Dispensability | Representative                 |
|---------|-------------------------------------------|-----------|-------|------------|----------------|--------------------------------|
|         |                                           |           | -     |            |                |                                |
|         |                                           |           | 1.8   | 0.928      |                |                                |
| GO:0005 |                                           | 5.8261    | 279   | 6656       | 0.090          |                                |
| 975     | carbohydrate metabolic process            | 9         | 9     | 35         | 37153          | null                           |
|         |                                           |           | -     |            |                |                                |
|         |                                           |           | 1.0   | 0.938      |                |                                |
| GO:1901 | carbohydrate derivative metabolic process | 6.8137    | 690   | 3445       | 0.103          | carbohydrate metabolic process |
| 135     |                                           | 2         | 3     | 21         | 35243          |                                |

|            |                                            |        |     |       |       |                                   |  |
|------------|--------------------------------------------|--------|-----|-------|-------|-----------------------------------|--|
|            |                                            |        | -   |       |       |                                   |  |
|            |                                            |        | 4.4 | 0.863 |       |                                   |  |
| GO:0006099 | tricarboxylic acid cycle                   | 0.5173 | 762 | 8390  |       |                                   |  |
|            |                                            | 8      | 5   | 13    | 0     | null                              |  |
|            |                                            |        | -   | 0.987 |       |                                   |  |
| GO:0006457 | protein folding                            | 1.0380 | 2.4 | 7121  | 0.012 |                                   |  |
|            |                                            | 8      | 677 | 61    | 32809 | null                              |  |
|            |                                            |        | -   |       |       |                                   |  |
|            |                                            |        | 3.0 | 0.987 |       |                                   |  |
| GO:0007010 | cytoskeleton organization                  | 0.9577 | 710 | 7934  | 0.011 |                                   |  |
|            |                                            | 8      | 9   | 7     | 46205 | null                              |  |
|            |                                            |        | -   |       |       |                                   |  |
|            |                                            |        | 1.8 | 0.946 |       |                                   |  |
| GO:0009793 | embryo development ending in seed dormancy |        | 105 | 0531  |       |                                   |  |
|            |                                            | 0.0213 | 6   | 88    | 0     | null                              |  |
|            |                                            |        | -   |       |       |                                   |  |
|            |                                            |        | 1.0 |       |       |                                   |  |
| GO:0015031 | protein transport                          | 2.7257 | 707 |       |       |                                   |  |
|            |                                            | 1      | 7   | 1     | 0     | null                              |  |
|            |                                            |        | -   |       |       |                                   |  |
|            |                                            |        | 1.2 | 0.943 |       |                                   |  |
| GO:0015979 | photosynthesis                             | 0.2175 | 812 | 4241  | 0.060 |                                   |  |
|            |                                            | 9      | 7   | 56    | 84153 | null                              |  |
|            |                                            |        | -   |       |       |                                   |  |
|            |                                            |        | 1.4 | 0.833 |       |                                   |  |
| GO:0033356 | UDP-L-arabinose metabolic process          | 0.0033 | 341 | 8947  | 0.047 |                                   |  |
|            |                                            | 3      | 4   | 42    | 03988 | null                              |  |
|            |                                            |        | -   |       |       |                                   |  |
|            |                                            |        | 1.3 | 0.816 |       |                                   |  |
| GO:0006097 | glyoxylate cycle                           | 0.0538 | 685 | 4135  | 0.268 | UDP-L-arabinose metabolic process |  |
|            |                                            | 4      | 3   | 07    | 65503 |                                   |  |
|            |                                            |        | -   |       |       |                                   |  |
|            |                                            |        | 1.3 | 0.822 |       |                                   |  |
| GO:0006101 | citrate metabolic process                  | 0.0108 | 685 | 7418  | 0.164 | UDP-L-arabinose metabolic process |  |
|            |                                            | 5      | 3   | 41    | 39007 |                                   |  |
|            |                                            |        | -   |       |       |                                   |  |
|            |                                            |        | 1.2 | 0.784 |       |                                   |  |
| GO:0006536 | glutamate metabolic process                | 0.2023 | 176 | 5563  | 0.325 | UDP-L-arabinose metabolic process |  |
|            |                                            | 5      | 4   | 98    | 9023  |                                   |  |
|            |                                            |        | -   |       |       |                                   |  |
|            |                                            |        | 1.2 | 0.874 |       |                                   |  |
| GO:0015995 | chlorophyll biosynthetic process           | 0.0477 | 306 | 9338  | 0.132 | UDP-L-arabinose metabolic process |  |
|            |                                            | 8      | 1   | 66    | 8704  |                                   |  |
|            |                                            |        | -   | 0.839 |       |                                   |  |
| GO:0035999 | tetrahydrofolate interconversion           | 0.1589 | 1.0 | 9656  | 0.205 | UDP-L-arabinose metabolic process |  |
|            |                                            | 1      | 482 | 81    | 20025 |                                   |  |
|            |                                            |        | -   |       |       |                                   |  |
|            |                                            |        | 1.6 | 0.848 |       |                                   |  |
| GO:0042744 | hydrogen peroxide catabolic process        | 0.1227 | 420 | 2478  | 0.057 |                                   |  |
|            |                                            | 2      | 2   | 04    | 92981 | null                              |  |
|            |                                            |        |     | 0.806 |       |                                   |  |
| GO:0046686 | response to cadmium ion                    | 0.0088 | -   | 8122  |       |                                   |  |
|            |                                            | 2      | 23. | 61    | 0     | null                              |  |

|         |                                     |        |     |       |       |                        |  |
|---------|-------------------------------------|--------|-----|-------|-------|------------------------|--|
|         |                                     |        | 064 |       |       |                        |  |
|         |                                     |        | 5   |       |       |                        |  |
|         |                                     |        | -   |       |       |                        |  |
|         |                                     |        | 2.0 | 0.812 |       |                        |  |
| GO:0009 |                                     | 0.0302 | 682 | 3304  | 0.190 | response to cadmium    |  |
| 651     | response to salt stress             | 7      | 3   | 35    | 48836 | ion                    |  |
|         |                                     |        | -   |       |       |                        |  |
|         |                                     |        | 1.5 | 0.986 |       |                        |  |
| GO:0080 | negative regulation of response to  | 0.0001 | 119 | 8542  |       |                        |  |
| 148     | water deprivation                   | 8      | 8   | 61    | 0     | null                   |  |
|         |                                     |        | -   |       |       |                        |  |
|         |                                     |        | 1.4 | 0.969 |       | negative regulation of |  |
| GO:0045 |                                     | 0.1778 | 597 | 2513  | 0.116 | response to water      |  |
| 454     | cell redox homeostasis              | 8      | 2   | 92    | 69074 | deprivation            |  |
|         |                                     |        | -   |       |       |                        |  |
|         |                                     |        | 1.7 | 0.978 |       | negative regulation of |  |
| GO:0051 |                                     | 10.176 | 311 | 3476  | 0.288 | response to water      |  |
| 252     | regulation of RNA metabolic process | 5      | 5   | 48    | 32307 | deprivation            |  |
