# Supplementary material for: Proteome Landscape during Ripening of Solid Endosperm from Two Different Coconut Cultivars Reveals Contrasting Carbohydrate and Fatty Acid Metabolic Pathway Modulation
Source: Int J Mol Sci. 2023 Jun 21;24(13):10431. doi: 10.3390/ijms241310431 (PMC10341993; doi:10.3390/ijms241310431)
Supplement: Supplementary file 1 [file ijms-24-10431-s001.zip]

Archive with 6 entries (6 files):
- FIGURE LEGENDS FOR SUPPLEMENTARY MATERIAL.pdf
- Figure S1.tif
- Figure S2.tif
- Figure S3.tiff
- Table S1.xlsx
- Table S2.pdf
