# Supplementary material for: Proteome Landscape during Ripening of Solid Endosperm from Two Different Coconut Cultivars Reveals Contrasting Carbohydrate and Fatty Acid Metabolic Pathway Modulation
Source: Int J Mol Sci. 2023 Jun 21;24(13):10431. doi: 10.3390/ijms241310431 (PMC10341993; doi:10.3390/ijms241310431)
Supplement: Supplementary file 1 [file ijms-24-10431-s001.zip › Table S1.xlsx]

## Sheet: YGD
Accession	Datepalm	Arab	Elaeis guineensis PMN	Protein name	Immature			Average Imm	Intermediate			Average Int	Mature			Average Mat	SD Imm	SD Int	SD Mat	CV% Imm	CV% Int	CV% Mat	Log FC Int/Imm	Log 2 FC Int/imm	T.TEST	Log (10) T.TEST	P-value	Log FC Mat/Imm	Log 2 FC Mat/Imm	T.TEST	Log (10) T.TEST	P-value	Log FC Mat/Int	Log 2 FC Mat/Int	T.TEST	Log (10) T.TEST	P-value
KAG1347739	A0A8B7BEE0	#N/A	#N/A	vicilin-like antimicrobial peptides 2-2	22487.3	21515	21593.7	21865.3	8003.5	10100.2	10649.3	9584.33	49997.7	51369.6	52455.7	51274.3	440.969	1140.07	1005.73	2.01675	11.8952	1.96147	0.438335	-1.1899	0.00806668	-2.09331	2.09331	2.34501	1.22959	0.00113779	-2.94394	2.94394	5.34981	2.41949	2.71356e-05	-4.56646	4.56646
AYJ721721	A0A8B7CKA4	AT1G13440	MONOMER8I-1897	glyceraldehyde-3-phosphate dehydrogenase	14868.2	15333.1	15041.8	15081	20928.9	22516.2	17838.4	20427.8	11811.7	11456.5	10725.7	11331.3	191.811	1942.29	452.11	1.27187	9.50807	3.98992	1.35454	0.437801	0.0555478	-1.25533	1.25533	0.751361	-0.412422	0.00955095	-2.01995	2.01995	0.554699	-0.850223	0.0153306	-1.81444	1.81444
KAG1365105	A0A8B7CFN0	AT1G79550	MONOMER8I-2984	phosphoglycerate kinase 3, cytosolic	9229.9	9407.5	9067.2	9234.87	7390.4	9491.5	7349.9	8077.27	6345.6	6415.2	6344.9	6368.57	138.971	1000.15	32.976	1.50485	12.3823	0.517793	0.874649	-0.193224	0.2037	-0.691009	0.691009	0.689622	-0.536122	0.000748458	-3.12583	3.12583	0.788456	-0.342898	0.12974	-0.886925	0.886925
KAG1363372	A0A8B7CE63	AT2G36460	MONOMER8I-2617	fructose-bisphosphate aldolase 1, cytoplasmic	7068.6	6715.5	6746.8	6843.63	10872.4	9519.9	11224.9	10539.1	2893.3	2725	2405.1	2674.47	159.588	734.888	202.485	2.33192	6.97299	7.57103	1.53998	0.622913	0.0168721	-1.77283	1.77283	0.390796	-1.35551	0.000591345	-3.22816	3.22816	0.253767	-1.97842	0.005531	-2.2572	2.2572
AKS268491	A0A8B7CS47	#N/A	#N/A	11S globulin isoform 2	5523.3	6045.2	5950.9	5839.8	4710.9	5082.8	4681.3	4825	4565.3	4987.7	4751.9	4768.3	227.086	182.692	172.834	3.8886	3.78637	3.62464	0.826227	-0.27539	0.017131	-1.76622	1.76622	0.816518	-0.292444	0.00423136	-2.37352	2.37352	0.988249	-0.0170539	0.476759	-0.321701	0.321701
KAG1362604	A0A8B7BJP3	AT2G36530	MONOMER8I-2601	Enolase 2	5624.6	5686.1	5571.4	5627.37	5123.5	6228.8	4013.9	5122.07	2843.4	2689.6	2588.9	2707.3	46.8669	904.23	104.65	0.832839	17.6536	3.86549	0.910207	-0.135734	0.492277	-0.307791	0.307791	0.481095	-1.05561	0.000566826	-3.24655	3.24655	0.528556	-0.919871	0.0589934	-1.2292	1.2292
KAG1368674	A0A8B9A5W3	#N/A	#N/A	putative Vicilin-like antimicrobial peptides 2-1	5018.8	4667.1	4956.5	4880.8	1852.1	2393.6	3067.7	2437.8	12306	13085.8	13091.7	12827.8	153.234	497.25	369	3.13953	20.3975	2.87656	0.499467	-1.00154	0.0231739	-1.635	1.635	2.62822	1.39409	0.00182449	-2.73886	2.73886	5.26205	2.39563	0.000353924	-3.45109	3.45109
KAG1360659	A0A8B7D3M2	AT5G51970	MONOMER8I-2044	sorbitol dehydrogenase	4690.1	4910.1	4782.2	4794.13	8896.9	6808.5	11565.7	9090.37	1861.3	1611.9	1503.6	1658.93	90.2101	1946.93	149.77	1.88168	21.4175	9.02807	1.89614	0.923068	0.093044	-1.03131	1.03131	0.346034	-1.53101	0.00238246	-2.62298	2.62298	0.182494	-2.45408	0.0345535	-1.46151	1.46151
KAG1330548	A0A8B7BLV7	AT3G02520	#N/A	14-3-3-like protein	3526	3748.5	3814.8	3696.43	7891.6	6626.2	7603.7	7373.83	1211.8	1021.5	806.1	1013.13	123.517	541.565	165.732	3.34151	7.34441	16.3584	1.99485	0.996281	0.0135899	-1.86678	1.86678	0.274084	-1.86731	0.00560134	-2.25171	2.25171	0.137396	-2.86359	0.0035413	-2.45084	2.45084
AYJ721691	A0A8B7CZY3	AT5G09810	#N/A	Actin-101	2966.6	3199.3	3193.9	3119.93	5236.6	3886.2	5257.5	4793.43	677.3	505.9	415.6	532.933	108.445	641.568	108.535	3.47589	13.3843	20.3656	1.53639	0.619544	0.0779848	-1.10799	1.10799	0.170816	-2.54949	0.00338309	-2.47069	2.47069	0.11118	-3.16903	0.0108576	-1.96426	1.96426
KAG1369845	A0A8B7BMD6	AT5G10160	EGU1685G1909-MONOMER	3-hydroxyacyl-[acyl-carrier-protein] dehydratase FabZ-like	2448.1	2439.7	2473.5	2453.77	665.8	1198.8	405.9	756.833	1436	1472.2	1391.2	1433.13	14.3688	330.038	33.1302	0.585581	43.6078	2.31173	0.308437	-1.69695	0.0198064	-1.70319	1.70319	0.584054	-0.775825	0.00107005	-2.97059	2.97059	1.89359	0.921125	0.0849585	-1.07079	1.07079
KAG1330568	A0A8B9APY9	AT1G70730	EGU1136G0588-MONOMER	Phosphoglucomutase, cytoplasmic 2	2238.7	2306.2	2327.9	2290.93	2146.7	2432.6	2195.6	2258.3	1974.7	1986.9	1974.1	1978.57	37.9821	124.855	5.89765	1.65793	5.52872	0.298077	0.985755	-0.0206983	0.724015	-0.140253	0.140253	0.863651	-0.21148	0.00693749	-2.1588	2.1588	0.876131	-0.190781	0.0799021	-1.09744	1.09744
KAG1337991	A0A8B9AAG1	AT5G60390	#N/A	putative Elongation factor 1-alpha	1862	1985	1941.2	1929.4	723	782.7	725.7	743.8	708.4	546	664.8	639.733	50.903	27.5285	68.628	2.63828	3.70107	10.7276	0.385508	-1.37517	0.000396315	-3.40196	3.40196	0.331571	-1.59261	0.00408237	-2.38909	2.38909	0.860088	-0.217444	0.263824	-0.578686	0.578686
KAG1333893	A0A8B7C298	AT5G06390	#N/A	Fasciclin-like arabinogalactan protein 17	1473.5	1704.7	1723.3	1633.83	1478.6	1233.1	1554.4	1422.03	364.9	328.9	317.8	337.2	113.627	137.133	20.1042	6.95461	9.64346	5.96211	0.870366	-0.200306	0.267708	-0.572339	0.572339	0.206386	-2.27658	0.00525939	-2.27906	2.27906	0.237125	-2.07628	0.007906	-2.10204	2.10204
KAG1361551	A0A8B7CS47	#N/A	MONOMER8I-2897	Glutelin type-A 1	1705.7	1658.7	1648.5	1670.97	1410.7	1451.3	1480.6	1447.53	2551.6	2827.4	2738	2705.67	24.9107	28.6606	114.893	1.49079	1.97996	4.24637	0.866285	-0.207086	0.0271095	-1.56688	1.56688	1.61922	0.695301	0.00869713	-2.06062	2.06062	1.86916	0.902388	0.00289975	-2.53764	2.53764
KAG1366377	A0A8B9AUX0	AT3G43190	MONOMER8I-354	sucrose synthase 1	1844	1566	1615.9	1675.3	1128.3	1323.7	818.3	1090.1	308.1	235.3	250.3	264.567	121.016	208.089	31.3859	7.22354	19.089	11.8631	0.650689	-0.619959	0.0774434	-1.11102	1.11102	0.157922	-2.66272	0.00201292	-2.69617	2.69617	0.242699	-2.04276	0.0315653	-1.50079	1.50079
KAG1365594	A0A8B7BYK8	AT1G09780	EGU2621G1831-MONOMER	2,3-bisphosphoglycerate-independent phosphoglycerate mutase	1373.4	1411.5	1599.1	1461.33	1021.6	1588.2	851	1153.6	269.5	203.9	169.5	214.3	98.6497	315.102	41.4819	6.75066	27.3147	19.3569	0.789416	-0.341142	0.369491	-0.432397	0.432397	0.146647	-2.76958	0.00588225	-2.23046	2.23046	0.185766	-2.42844	0.0521921	-1.2824	1.2824
KAG1346346	#N/A	#N/A	#N/A	putative Bowman-Birk type proteinase inhibitor, partial	2092.1	1917	1597.7	1868.93	420.8	586.1	675.9	560.933	3906.5	3273	4169.4	3782.97	204.68	105.654	376.235	10.9517	18.8353	9.94549	0.300136	-1.73631	0.0263585	-1.57908	1.57908	2.02413	1.0173	0.0326263	-1.48643	1.48643	6.74406	2.75362	0.00682606	-2.16583	2.16583
KAG1347827	A0A8B8ZZR1	AT5G15490	MONOMER8I-2048	putative UDP-glucose 6-dehydrogenase 4	1675.5	1672.8	1592.2	1646.83	1280.4	1324.1	968.5	1191	333.1	241.1	223.4	265.867	38.6473	158.34	48.0872	2.34677	13.2947	18.0869	0.723206	-0.467521	0.0330538	-1.48078	1.48078	0.161441	-2.63092	0.000367664	-3.43455	3.43455	0.22323	-2.1634	0.0110738	-1.9557	1.9557
KAG1367826	A0A8B7CBX8	AT1G56070	#N/A	Elongation factor 2	1349.3	1562.9	1533.8	1482	1245.7	1372.3	1226.2	1281.4	557.9	439.9	472.6	490.133	94.5821	64.7671	49.7431	6.38206	5.0544	10.1489	0.864642	-0.209825	0.0769214	-1.11395	1.11395	0.330724	-1.5963	0.010372	-1.98414	1.98414	0.382498	-1.38647	0.00842208	-2.07458	2.07458
KAG1369984	A0A8B9B156	AT1G77120	MONOMER8I-2100	Alcohol dehydrogenase 1	1500.9	1522.1	1490.4	1504.47	1436.5	1561.3	1255.6	1417.8	803	806.8	826.4	812.067	13.1849	125.5	10.2532	0.876385	8.85174	1.26261	0.942394	-0.0855981	0.391295	-0.407496	0.407496	0.53977	-0.889582	0.000472884	-3.32525	3.32525	0.572765	-0.803984	0.02369	-1.62544	1.62544
KAG1337875	A0A8B9A2X0	AT2G28930	MONOMER8I-1556	putative Receptor-like cytoplasmic kinase	1337.9	1392.1	1434.6	1388.2	1122.8	1328.4	743.9	1065.03	2213.8	1998.4	2303.4	2171.87	39.5738	242.092	127.998	2.85073	22.7309	5.89343	0.767205	-0.382317	0.229238	-0.639714	0.639714	1.56452	0.64572	0.012572	-1.9006	1.9006	2.03925	1.02804	0.0498755	-1.30211	1.30211
A0A222NNM91	#N/A	#N/A	#N/A	cocosin 1	1210.5	1363.3	1292.8	1288.87	851.6	987.3	663.6	834.167	940.2	950.2	949.8	946.733	62.4423	132.724	4.62265	4.84475	15.9109	0.488274	0.647209	-0.627695	0.0350094	-1.45582	1.45582	0.734547	-0.445073	0.0142101	-1.8474	1.8474	1.13495	0.182622	0.354162	-0.450798	0.450798
KAG1361405	A0A8B7CJF5	AT5G03340	EGU0799G0010-MONOMER	Cell division cycle protein 48	1230.1	1316.6	1148.5	1231.73	783.1	876.4	435.1	698.2	155.2	128.7	109.5	131.133	68.6363	189.899	18.7361	5.57233	27.1984	14.2878	0.566843	-0.818978	0.0272692	-1.56433	1.56433	0.106462	-3.23158	0.00165746	-2.78056	2.78056	0.187816	-2.41261	0.0457123	-1.33997	1.33997
KAG1333928	A0A8B7C1C1	AT5G17920	EGU2441G1163-MONOMER	5-methyltetrahydropteroyltriglutamate--homocysteine methyltransferase 1	1140.3	1052.2	1130.6	1107.7	1949.6	1438.2	1698.1	1695.3	1072.4	1072.8	1019.5	1054.9	39.4437	208.788	25.0321	3.56087	12.3157	2.37294	1.53047	0.613973	0.0408874	-1.38841	1.38841	0.952334	-0.070461	0.306263	-0.513906	0.513906	0.62225	-0.684434	0.050084	-1.3003	1.3003
KAG1366505	A0A8B7C9H8	AT1G35720	MONOMER8I-2544	annexin D1	1180.7	1098.5	1127.8	1135.67	334.3	357.9	402.4	364.867	472.3	482.1	480.4	478.267	34.0159	28.2348	4.27577	2.99524	7.73838	0.894014	0.32128	-1.6381	0.00242845	-2.61467	2.61467	0.421133	-1.24765	0.00168563	-2.77324	2.77324	1.3108	0.390446	0.0246539	-1.60811	1.60811
KAG1331530	A0A8B7CPZ3	AT4G13940	EGU2490G0002-MONOMER	Adenosylhomocysteinase	1091.3	1222.1	1104.1	1139.17	1295.3	1468.7	748.1	1170.7	632.3	576.7	533.5	580.833	58.8751	307.094	40.4407	5.16826	26.2316	6.96253	1.02768	0.0393926	0.885907	-0.0526117	0.0526117	0.509876	-0.971783	0.00927796	-2.03255	2.03255	0.496142	-1.01118	0.0974081	-1.0114	1.0114
KAG1338865	A0A8B7C7C6	AT5G56350	MONOMER8I-2828	Pyruvate kinase	1104.8	1136.4	1085.6	1108.93	2050.9	1720.2	1671.9	1814.33	613.4	614.2	567.4	598.333	20.9439	168.436	21.8756	1.88866	9.28363	3.65609	1.63611	0.710267	0.0278973	-1.55444	1.55444	0.539558	-0.890151	0.000358414	-3.44561	3.44561	0.329781	-1.60042	0.00819339	-2.08654	2.08654
KAG1365762	A0A8B7BH24	AT5G02490	#N/A	Heat shock 70 kDa protein	844.5	833.1	913.5	863.7	1256.7	1052.2	1235.9	1181.6	653.6	646.2	597.8	632.533	35.5201	91.8928	24.7453	4.11255	7.77698	3.91209	1.36807	0.45214	0.0294437	-1.53101	1.53101	0.732353	-0.449389	0.0318652	-1.49668	1.49668	0.535319	-0.901528	0.016875	-1.77276	1.77276
KAG1359409	A0A8B7CHJ2	AT2G16600	#N/A	peptidyl-prolyl cis-trans isomerase CYP19-1	804.8	899.1	901.9	868.6	799.5	721.1	702.1	740.9	614.6	616.5	660.5	630.533	45.1279	42.1562	21.2038	5.19547	5.68987	3.36284	0.852982	-0.229413	0.173586	-0.760485	0.760485	0.725919	-0.462119	0.0123692	-1.90766	1.90766	0.851037	-0.232706	0.116923	-0.932101	0.932101
KAG1342718	A0A8B7BNY4	AT1G18100	MONOMER8I-573	putative protein MOTHER of FT and TFL1	811.7	835.9	882.5	843.367	680.3	527.5	908.3	705.367	434.7	440.8	415	430.167	29.3822	156.468	11.0098	3.48392	22.1825	2.55943	0.83637	-0.257787	0.289082	-0.538979	0.538979	0.510059	-0.971264	0.00444742	-2.35189	2.35189	0.609848	-0.713478	0.145519	-0.83708	0.83708
KAG1334072	A0A8B7BIU4	AT3G52990	MONOMER8I-2354	Pyruvate kinase 1, cytosolic	850.3	852.8	851.2	851.433	1176.6	1110.6	1277	1188.07	790.8	688	733.4	737.4	1.03387	68.4147	42.0631	0.121427	5.75849	5.70425	1.39537	0.48065	0.020352	-1.69139	1.69139	0.866069	-0.207446	0.0645054	-1.1904	1.1904	0.620672	-0.688096	0.0110023	-1.95852	1.95852
KAG1328294	A0A8B7BYV7	AT1G56450	#N/A	proteasome subunit beta type-4	1016.9	755.2	829.2	867.1	1350.2	1167.1	1343.7	1287	391.7	400.1	342.5	378.1	110.148	84.8236	25.4055	12.7031	6.5908	6.71926	1.48426	0.569742	0.0152528	-1.81665	1.81665	0.436051	-1.19743	0.0244992	-1.61085	1.61085	0.293784	-1.76717	0.00621901	-2.20628	2.20628
KAG1369965	A0A8B7C2C7	AT1G21750	#N/A	protein disulfide-isomerase	728.9	801.2	753.8	761.3	669.6	883.3	508.2	687.033	537.4	512.3	522	523.9	29.989	153.629	10.3347	3.93918	22.3613	1.97265	0.902448	-0.148085	0.515799	-0.287519	0.287519	0.688165	-0.539174	0.0138723	-1.85785	1.85785	0.762554	-0.391089	0.283022	-0.54818	0.54818
KAG1341863	A0A8B7BX91	AT1G50010	#N/A	Tubulin alpha chain	739.7	748.4	753.5	747.2	634.3	568.8	485.2	562.767	281.3	237.6	250.7	256.533	5.69737	61.0191	18.3111	0.762496	10.8427	7.13789	0.753167	-0.408958	0.0594306	-1.22599	1.22599	0.343326	-1.54235	0.00110145	-2.95803	2.95803	0.455843	-1.13339	0.0138469	-1.85865	1.85865
KAG1360773	A0A8B7CLQ7	AT5G52640	#N/A	Heat shock protein 83	719.1	710.7	741	723.6	793.2	885.5	596.9	758.533	174.6	143.6	129.5	149.233	12.7726	120.343	18.838	1.76515	15.8653	12.6232	1.04828	0.0680202	0.746145	-0.127177	0.127177	0.206237	-2.27762	0.00117189	-2.93111	2.93111	0.196739	-2.34564	0.0165518	-1.78115	1.78115
KAG1371593	A0A8B9A3G1	AT5G60390	#N/A	Elongation factor 1-alpha	749.5	833.5	738.5	773.833	327.6	335.9	408.2	357.233	204.7	227	187.1	206.267	42.429	36.1978	16.3267	5.48297	10.1328	7.91535	0.461641	-1.11516	0.0132131	-1.879	1.879	0.266552	-1.90751	0.00118554	-2.92608	2.92608	0.5774	-0.792356	0.0505606	-1.29619	1.29619
KAG1331543	A0A8B7C9K5	AT3G25230	#N/A	Peptidylprolyl isomerase	581.4	699.9	692.1	657.8	507.6	557.1	564.2	542.967	163.9	146.3	97.6	135.933	54.1167	25.1754	28.0419	8.22693	4.63664	20.6292	0.825428	-0.276785	0.0317458	-1.49831	1.49831	0.206648	-2.27475	0.0103477	-1.98516	1.98516	0.250353	-1.99796	0.00753279	-2.12304	2.12304
KAG1365307	A0A8B7CEU5	AT1G09210	EGU1685G0072-MONOMER	putative Calreticulin	570.7	634.9	634.7	613.433	637.5	720.8	498.8	619.033	494.2	295.3	395.9	395.133	30.2171	91.567	81.2024	4.9259	14.7919	20.5506	1.00913	0.0131105	0.944287	-0.024896	0.024896	0.644134	-0.634567	0.104319	-0.981637	0.981637	0.638307	-0.647678	0.158083	-0.801114	0.801114
KAG1328064	A0A8B7BQT4	AT1G72160	#N/A	Patellin-1	571.2	591.8	591.4	584.8	410.8	483.6	302.3	398.9	580.1	623.9	660.2	621.4	9.61804	74.4922	32.7484	1.64467	18.6744	5.27011	0.682114	-0.551916	0.0744032	-1.12841	1.12841	1.06259	0.0875789	0.170681	-0.767814	0.767814	1.55778	0.639495	0.0825269	-1.0834	1.0834
KAG1348050	A0A8B7BXE4	AT5G23860	#N/A	Tubulin beta-3 chain	521.3	560.9	582.8	555	483.7	486.1	391	453.6	235	214	241.6	230.2	25.4515	44.2757	11.7678	4.58586	9.76096	5.11197	0.817297	-0.291067	0.16077	-0.793796	0.793796	0.414775	-1.2696	0.0035196	-2.45351	2.45351	0.507496	-0.978533	0.0271941	-1.56553	1.56553
KAG1342609	A0A8B7BPK0	#N/A	EGU0159G0242-MONOMER	putative nucleoredoxin 1-1	562.5	559.2	575.4	565.7	755.8	704.1	626	695.3	200.3	174.6	147.7	174.2	6.98999	53.3547	21.4757	1.23564	7.67363	12.3282	1.2291	0.297598	0.0905451	-1.04314	1.04314	0.307937	-1.69929	0.00240156	-2.61951	2.61951	0.250539	-1.99689	0.00188859	-2.72386	2.72386
KAG1346182	A0A8B9A549	AT5G55190	#N/A	GTP-binding nuclear protein Ran-A1	558	561.5	571.9	563.8	689.4	592.6	525.7	602.567	241.4	225.2	230.3	232.3	5.90311	67.2008	6.76314	1.04702	11.1524	2.91138	1.06876	0.0959374	0.529511	-0.276125	0.276125	0.412026	-1.27919	0.000525949	-3.27906	3.27906	0.385518	-1.37513	0.0138754	-1.85775	1.85775
KAG1327655	A0A8B8ZT31	#N/A	#N/A	embryonic protein DC-8	701.1	626.1	571.7	632.967	412.7	333.5	674.3	473.5	1657.3	1641.8	1733	1677.37	53.05	145.622	39.8444	8.38117	30.7544	2.37541	0.748065	-0.418765	0.34774	-0.458746	0.458746	2.65001	1.406	0.0033853	-2.4704	2.4704	3.54249	1.82476	0.00384612	-2.41498	2.41498
KAG1358718	A0A8B7C5N1	AT1G24360	EGU1685G1836-MONOMER	hypothetical protein COCNU_08G001640	601.7	579.5	562.4	581.2	250.9	351.9	124.9	242.567	56.1	37.7	38.2	44	16.0891	92.8595	8.55843	2.76826	38.2821	19.451	0.417355	-1.26065	0.0308512	-1.51073	1.51073	0.0757054	-3.72346	0.00015054	-3.82235	3.82235	0.181393	-2.46281	0.0942547	-1.0257	1.0257
KAG1354979	A0A8B7CTE7	#N/A	#N/A	protein TRI1	579	494.9	558.1	544	140.3	261	225.9	209.067	366	377.6	314.4	352.667	35.752	50.6928	27.4699	6.57206	24.2472	7.7892	0.384314	-1.37964	0.0297882	-1.52596	1.52596	0.648284	-0.625301	0.0373705	-1.42747	1.42747	1.68686	0.754342	0.0754277	-1.12247	1.12247
KAG1366840	A0A8B7C260	#N/A	#N/A	MFP1 attachment factor 1	574.3	548.6	548.9	557.267	503.8	539.5	467.4	503.567	343.6	346.8	336.5	342.3	12.045	29.4352	4.30426	2.16144	5.84534	1.25745	0.903637	-0.146185	0.139939	-0.85406	0.85406	0.614248	-0.703107	0.00153825	-2.81297	2.81297	0.679751	-0.556921	0.0120283	-1.9198	1.9198
KAG1365376	A0A8B7BH10	AT1G11840	EGU2441G0280-MONOMER	putative Lactoylglutathione lyase	892.8	476.7	538.3	635.933	595.5	646.4	885.6	709.167	797.9	846.7	810.9	818.5	183.365	126.476	20.6346	28.834	17.8344	2.52103	1.11516	0.157249	0.739888	-0.130834	0.130834	1.28708	0.364107	0.32616	-0.48657	0.48657	1.15417	0.206858	0.356736	-0.447653	0.447653
KAG1363572	A0A8B8ZK78	AT5G13420	EGU2407G0044-MONOMER	putative Cytochrome b-c1 complex subunit Rieske-4, mitochondrial	503.3	542.7	530.8	525.6	530.5	526.2	584	546.9	324.8	318.5	326.8	323.367	16.4999	26.2923	3.53679	3.13925	4.80752	1.09374	1.04053	0.0573118	0.404827	-0.39273	0.39273	0.615233	-0.700794	0.00424732	-2.37189	2.37189	0.591272	-0.758106	0.00562972	-2.24951	2.24951
KAG1326198	A0A8B9A143	AT4G16155	EGU1685G0072-MONOMER	putative Dihydrolipoyl dehydrogenase 2, chloroplastic	473.2	504.6	500.6	492.8	551.1	473.3	518.9	514.433	108.5	74.4	80.4	87.7667	13.9552	31.9184	14.8639	2.83181	6.20457	16.9357	1.0439	0.0619819	0.563918	-0.248784	0.248784	0.178098	-2.48926	0.0025203	-2.59855	2.59855	0.170608	-2.55124	0.00106478	-2.97274	2.97274
KAG1339069	A0A8B7C6H1	AT5G58590	#N/A	ran-binding protein 1	458	510.3	498.6	488.967	549.2	458.5	652.3	553.333	131.6	124.3	100.9	118.933	22.4117	79.1725	13.0951	4.58347	14.3083	11.0105	1.13164	0.178413	0.400857	-0.397011	0.397011	0.243234	-2.03958	0.00354054	-2.45093	2.45093	0.21494	-2.218	0.0205556	-1.68707	1.68707
KAG1338334	A0A8B7BZC1	AT5G12250	#N/A	Tubulin beta chain	453	502.9	496.7	484.2	376.3	334	317.9	342.733	124.5	119.2	121.3	121.667	22.2065	24.6285	2.17919	4.58622	7.1859	1.79112	0.707834	-0.498517	0.0489625	-1.31014	1.31014	0.251274	-1.99267	0.00223933	-2.64988	2.64988	0.354989	-1.49415	0.00535337	-2.27137	2.27137
KAG1347700	A0A8B7BV95	AT3G22960	MONOMER8I-499	pyruvate kinase isozyme A, chloroplastic	443.6	438.9	447.8	443.433	673.2	505.9	936.5	705.2	189	165.9	154.6	169.833	3.63532	177.242	14.3165	0.819812	25.1336	8.42974	1.59032	0.669315	0.166693	-0.778083	0.778083	0.382996	-1.3846	0.00165576	-2.781	2.781	0.24083	-2.05391	0.0542943	-1.26525	1.26525
KAG1360647	A0A8B7CP85	AT3G13470	#N/A	RuBisCO large subunit-binding protein subunit beta, chloroplastic	431.5	447.4	440.6	439.833	891.1	691.3	1113.5	898.633	176.7	157.8	155.5	163.333	6.51375	172.445	9.49819	1.48096	19.1897	5.81522	2.04312	1.03078	0.0657553	-1.18207	1.18207	0.371353	-1.42914	0.00155824	-2.80737	2.80737	0.181757	-2.45991	0.0268546	-1.57098	1.57098
KAG1366388	A0A8B9A8X5	AT3G14290	#N/A	proteasome subunit alpha type-5	379.7	386.4	436.8	400.967	1145.5	788.7	1226.5	1053.57	167	119.5	125.6	137.367	25.4852	190.186	21.1014	6.35594	18.0516	15.3614	2.62757	1.39373	0.0349648	-1.45637	1.45637	0.342589	-1.54545	0.0114745	-1.94027	1.94027	0.130383	-2.93918	0.019096	-1.71906	1.71906
KAG1363839	A0A8B7D1L8	AT5G56000	#N/A	Heat shock protein 81-3	452.5	463.6	432.6	449.567	493.6	568.6	259.9	440.7	60.4	32.8	33	42.0667	12.8245	131.46	12.9639	2.85265	29.8299	30.8175	0.980277	-0.0287382	0.92554	-0.033605	0.033605	0.0935716	-3.41779	0.000844486	-3.07341	3.07341	0.0954542	-3.38905	0.0481961	-1.31699	1.31699
KAG1326122	A0A8B8JCS2	AT3G62250	#N/A	Ubiquitin-40S ribosomal protein S27a	371.5	363.7	426.1	387.1	615	466.6	344.4	475.333	380.7	356	357.5	364.733	27.7604	110.644	11.3067	7.17138	23.2772	3.1	1.22793	0.296233	0.447662	-0.34905	0.34905	0.94222	-0.0858643	0.443717	-0.352894	0.352894	0.767321	-0.382098	0.261574	-0.582405	0.582405
KAG1367723	A0A8B8J5E0	AT5G52920	MONOMER8I-3016	plastidial pyruvate kinase 2	347.2	349.3	414.5	370.333	1005.8	525.7	1335.6	955.7	499.8	446.9	509.3	485.333	31.2423	332.533	27.4518	8.43627	34.7947	5.65628	2.58065	1.36773	0.115277	-0.938257	0.938257	1.31053	0.390152	0.0257451	-1.58931	1.58931	0.50783	-0.977582	0.161936	-0.790657	0.790657
KAG1354807	A0A8B7D115	AT3G23990	#N/A	Chaperonin CPN60-2, mitochondrial	392	393.6	392.7	392.767	202.6	290.2	142.8	211.867	320.7	354	325.6	333.433	0.654896	60.5315	14.6798	0.166739	28.5706	4.40261	0.539421	-0.890516	0.0510175	-1.29228	1.29228	0.848935	-0.236274	0.0269414	-1.56958	1.56958	1.57379	0.654242	0.0715673	-1.14529	1.14529
KAG1332010	A0A8B7CFG8	AT5G35360	MONOMER8I-843	biotin carboxylase 1, chloroplastic	328.2	369.8	387.2	361.733	736.7	523.8	760.7	673.733	177.1	178.2	143.7	166.333	24.7528	106.471	16.0105	6.84284	15.8031	9.62554	1.86251	0.897251	0.0594136	-1.22611	1.22611	0.459823	-1.12085	0.0182186	-1.73948	1.73948	0.246883	-2.0181	0.0254797	-1.59381	1.59381
KAG1354533	A0A8B7C4K5	AT5G09590	EGU0206G0150-MONOMER	putative Heat shock 70 kDa protein, mitochondrial	396.8	333.3	382.5	370.867	1439	859.3	2706.8	1668.37	222.5	220.6	125.3	189.467	27.1976	771.479	45.3793	7.33352	46.2416	23.9511	4.49856	2.16946	0.135974	-0.866544	0.866544	0.510875	-0.968957	0.049352	-1.3067	1.3067	0.113564	-3.13842	0.124075	-0.906315	0.906315
AIL287561	A0A8B7CJR8	AT5G08370	MONOMER8I-2881	alpha galactosidase isoform 2	370.1	339.7	371.3	360.367	301.5	548.1	458.7	436.1	5655.8	5645.9	5933	5744.9	14.6217	101.934	133.068	4.05746	23.3741	2.31628	1.21016	0.275193	0.444573	-0.352057	0.352057	15.9418	3.99474	0.000271747	-3.56584	3.56584	13.1734	3.71955	0.000437214	-3.35931	3.35931
KAG1359512	A0A8B7CRC6	AT5G17310	EGU0709G0399-MONOMER	putative UTP--glucose-1-phosphate uridylyltransferase	467.4	423.4	360.1	416.967	239.7	323.6	214.3	259.2	179.5	187.7	205.9	191.033	44.0406	46.7034	11.0325	10.5621	18.0183	5.77516	0.621632	-0.685866	0.0518721	-1.28507	1.28507	0.45815	-1.12611	0.0283929	-1.54679	1.54679	0.737011	-0.440241	0.206925	-0.684188	0.684188
KAG1370010	A0A8B9B175	AT1G09830	MONOMER8I-684	putative Phosphoribosylamine--glycine ligase	358.9	359.8	358.3	359	493.1	532.6	415.6	480.433	158.5	157	141.6	152.367	0.616441	48.5976	7.63777	0.171711	10.1154	5.01276	1.33825	0.420352	0.0700406	-1.15465	1.15465	0.42442	-1.23644	0.000604044	-3.21893	3.21893	0.317144	-1.65679	0.00799473	-2.0972	2.0972
KAG1371182	A0A8B7CCA9	AT5G12110	#N/A	elongation factor 1-beta-like	344.3	394	355.5	364.6	103.4	168.5	80.6	117.5	75.2	64.7	71	70.3	21.2858	37.2443	4.31509	5.83813	31.6973	6.13811	0.322271	-1.63365	0.00346988	-2.45969	2.45969	0.192814	-2.37472	0.00374293	-2.42679	2.42679	0.598298	-0.741064	0.24296	-0.614466	0.614466
KAG1348090	A0A8B7BQY5	AT5G42740	EGU2441G1622-MONOMER	putative glucose-6-phosphate isomerase, cytosolic 1	385.3	371.5	355.2	370.667	320.2	363.7	292	325.3	143	141.9	136.1	140.333	12.3024	29.4927	3.02692	3.31899	9.06631	2.15695	0.877608	-0.188352	0.137142	-0.862829	0.862829	0.378597	-1.40126	0.000846894	-3.07217	3.07217	0.431397	-1.21291	0.0108399	-1.96497	1.96497
KAG1361262	A0A8B7CD32	AT5G42020	#N/A	Luminal-binding protein 5	295	314.9	352.1	320.667	303.2	377.9	238.2	306.433	187.1	161.9	149.5	166.167	23.6649	57.0781	15.6438	7.37992	18.6266	9.41453	0.955613	-0.0655012	0.810974	-0.0909932	0.0909932	0.518191	-0.948443	0.0299324	-1.52386	1.52386	0.54226	-0.882942	0.068353	-1.16524	1.16524
KAG1342580	A0A8B7BQ46	AT3G43190	MONOMER8I-354	sucrose synthase 2	398.2	337.2	347.9	361.1	274.6	311	192.9	259.5	56.8	47.1	27.6	43.8333	26.5949	49.3823	12.1426	7.36496	19.0298	27.7017	0.718637	-0.476664	0.119991	-0.920853	0.920853	0.121388	-3.0423	0.00219434	-2.6587	2.6587	0.168915	-2.56563	0.0169993	-1.76957	1.76957
KAG1342017	A0A8B7BWZ6	#N/A	#N/A	MFP1 attachment factor 1	340.5	339.6	337.9	339.333	352.1	328.9	371.9	350.967	257.2	237.1	253.4	249.233	1.07806	17.573	8.71869	0.317701	5.00702	3.4982	1.03428	0.0486309	0.46245	-0.334935	0.334935	0.734479	-0.445206	0.00471636	-2.32639	2.32639	0.710134	-0.493837	0.00679801	-2.16762	2.16762
KAG1331157	A0A8B7BML0	AT1G34430	EGU1685G0776-MONOMER	dihydrolipoyllysine-residue acetyltransferase component 5 of pyruvate dehydrogenase complex, chloroplastic	323	347.9	336.3	335.733	370.9	428.5	226.3	341.9	35.5	13.6	11	20.0333	10.1733	85.0567	10.988	3.03017	24.8777	54.8485	1.01837	0.0262586	0.926102	-0.0333413	0.0333413	0.0596704	-4.06684	0.00205612	-2.68695	2.68695	0.0585941	-4.0931	0.0309868	-1.50882	1.50882
KAG1330986	A0A8B7BRW2	AT1G66240	#N/A	Copper transport protein ATX1	330.4	340.7	330.2	333.767	188	280.8	59.6	176.133	58	44.7	51.8	51.5	4.90329	90.6935	5.43384	1.46908	51.4914	10.5512	0.527714	-0.922172	0.123764	-0.907406	0.907406	0.154299	-2.6962	0.000628857	-3.20145	3.20145	0.292392	-1.77402	0.1994	-0.700275	0.700275
KAG1355122	A0A8B7CD32	AT5G42020	#N/A	Luminal-binding protein 5	294.1	290.2	329.8	304.7	531	460.3	357.7	449.667	118.5	108.5	104.5	110.5	17.8197	71.1478	5.88784	5.84826	15.8224	5.32836	1.47577	0.561466	0.142964	-0.844773	0.844773	0.362652	-1.46334	0.00643118	-2.19171	2.19171	0.245738	-2.02481	0.0182199	-1.73946	1.73946
KAG1331616	A0A8B7BGT4	AT5G13420	EGU2407G0044-MONOMER	transaldolase-like	296.4	320.1	329.6	315.367	402.1	402.4	324.7	376.4	205.8	190.9	182.5	193.067	13.961	36.5576	9.63477	4.4269	9.71244	4.99039	1.19353	0.255236	0.211401	-0.674893	0.674893	0.612197	-0.707931	0.0180788	-1.74283	1.74283	0.51293	-0.963168	0.0129035	-1.88929	1.88929
KAG1334572	A0A8B9ANC6	#N/A	MONOMER8I-2544	Annexin-like protein RJ4	321.1	311.7	327.9	320.233	178.6	163.3	202	181.3	103.3	130.3	128	120.533	6.64195	15.9141	12.2219	2.0741	8.7778	10.1399	0.56615	-0.820745	0.00234211	-2.63039	2.63039	0.376392	-1.40969	0.00275744	-2.55949	2.55949	0.664828	-0.588947	0.0484701	-1.31453	1.31453
KAG1342757	A0A8B7BP06	AT5G14780	MONOMER8I-2756	putative Formate dehydrogenase, mitochondrial	310.7	325.1	326.6	320.8	522.1	489.7	382.9	464.9	114.9	87.6	81.9	94.8	7.16798	59.4723	14.4021	2.23441	12.7925	15.1921	1.44919	0.535246	0.0883447	-1.05382	1.05382	0.295511	-1.75872	0.00451791	-2.34506	2.34506	0.203915	-2.29396	0.00861794	-2.0646	2.0646
KAG1334861	A0A8B7BFG6	#N/A	EGU1136G0588-MONOMER	putative Phosphoglucomutase, cytoplasmic 1	360.8	373.2	321.8	351.933	507.6	465	400.7	457.767	193.2	191.3	175.5	186.667	21.9006	43.9404	7.93403	6.22294	9.59887	4.25038	1.30072	0.37931	0.0365866	-1.43668	1.43668	0.530403	-0.914838	0.00389374	-2.40963	2.40963	0.407777	-1.29415	0.00892383	-2.04945	2.04945
KAG1330584	A0A8B7MSS6	AT2G01140	EGU1685G0101-MONOMER	fructose-bisphosphate aldolase 1, chloroplastic	313.7	321.9	305.5	313.7	356.6	501.6	169.9	342.7	136.2	116	91.3	114.5	6.69527	135.772	18.361	2.13429	39.6184	16.0358	1.09245	0.127561	0.780822	-0.107448	0.107448	0.364998	-1.45404	0.00309698	-2.50906	2.50906	0.334111	-1.5816	0.123693	-0.907657	0.907657
KAG1358676	A0A8B7CQ66	AT3G03960	#N/A	putative T-complex protein 1 subunit theta	309.7	310.9	305.1	308.567	210.7	206	171.2	195.967	43.9	57.9	41.3	47.7	2.49978	17.6175	7.29018	0.810126	8.99004	15.2834	0.635087	-0.654974	0.0090503	-2.04334	2.04334	0.154586	-2.69352	0.000232162	-3.63421	3.63421	0.243409	-2.03855	0.00512229	-2.29054	2.29054
KAG1362599	A0A8B7BFL4	AT1G08110	EGU0967G0001-MONOMER	Lactoylglutathione lyase	285.4	305.7	304.1	298.4	455.1	381.9	390.7	409.233	101.2	83.1	67.9	84.0667	9.21557	32.631	13.6118	3.08833	7.97369	16.1917	1.37143	0.455676	0.064446	-1.1908	1.1908	0.281725	-1.82764	0.00523557	-2.28104	2.28104	0.205425	-2.28332	0.00239741	-2.62026	2.62026
KAG1331790	A0A8B7BQH8	#N/A	#N/A	serine carboxypeptidase II-3	302.3	279.7	303	295	512	564.7	684.3	587	4730.2	5189.2	5297	5072.13	10.8225	72.0869	245.756	3.66865	12.2806	4.84522	1.98983	0.992646	0.0277262	-1.55711	1.55711	17.1937	4.10381	0.00135939	-2.86666	2.86666	8.64077	3.11116	0.000884914	-3.0531	3.0531
KAG1359660	A0A8B8J4L0	AT2G28000	#N/A	RuBisCO large subunit-binding protein subunit alpha, chloroplastic	290.8	269.7	294.2	284.9	496.9	426.5	521.2	481.533	65.6	52	34.5	50.7	10.8373	40.159	12.7298	3.80389	8.33983	25.108	1.69018	0.75718	0.011016	-1.95797	1.95797	0.177957	-2.4904	0.00303537	-2.51779	2.51779	0.105289	-3.24758	0.00560461	-2.25145	2.25145
KAG1365260	A0A8B8ZP70	#N/A	#N/A	subtilisin-like protease SBT1.5	454.9	222.2	294.1	323.733	375.1	331.4	370.3	358.933	189.6	160.4	171.9	173.967	97.2828	19.5674	12.0101	30.0503	5.45154	6.90367	1.10873	0.14891	0.607262	-0.216624	0.216624	0.537376	-0.895995	0.131142	-0.882258	0.882258	0.484677	-1.04491	0.00182573	-2.73856	2.73856
KAG1338775	A0A8B7BLX1	AT5G49460	MONOMER8I-578	TP-citrate synthase beta chain protein 1	267.4	264.8	285.2	272.467	529.7	398.6	617.3	515.2	118.5	124.9	95.1	112.833	9.06618	89.8707	12.8087	3.32744	17.4438	11.3519	1.89087	0.919053	0.0527527	-1.27776	1.27776	0.414118	-1.27189	0.0092415	-2.03426	2.03426	0.219009	-2.19094	0.0304558	-1.51633	1.51633
KAG1330847	A0A8B7MTK2	#N/A	#N/A	hypothetical protein COCNU_02G008150	233.1	233.2	253.5	239.933	280.5	340.9	201.3	274.233	56.6	49.4	33.1	46.3667	9.59317	57.1635	9.83068	3.99826	20.8448	21.202	1.14296	0.19277	0.538489	-0.268823	0.268823	0.193248	-2.37147	0.00488675	-2.31098	2.31098	0.169077	-2.56424	0.023612	-1.62687	1.62687
KAG1327231	A0A8B7CX75	AT2G05990	EGU0881G1273-MONOMER	enoyl-[acyl-carrier-protein] reductase [NADH] 1, chloroplastic	226.2	222.2	251.5	233.3	317.9	241.3	294.6	284.6	135.6	131.8	137.3	134.9	12.9725	32.0613	2.29928	5.56045	11.2654	1.70443	1.21989	0.286749	0.138243	-0.859355	0.859355	0.578225	-0.790296	0.00638429	-2.19489	2.19489	0.473999	-1.07705	0.0197512	-1.70441	1.70441
KAG1327345	A0A8B8ZHK4	AT5G56000	#N/A	Heat shock protein 81-	237.1	241.9	250.7	243.233	253.6	326.9	125.9	235.467	35	16.7	7.2	19.6333	5.63166	83.0537	11.5373	2.31533	35.2719	58.7637	0.968069	-0.0468181	0.911437	-0.0402731	0.0402731	0.0807181	-3.63096	0.00285728	-2.54405	2.54405	0.0833805	-3.58415	0.0598143	-1.22319	1.22319
KAG1334399	A0A8B7CE72	AT1G72330	MONOMER8I-2575	putative Alanine aminotransferase 2	203.7	201.5	249.3	218.167	191	193.3	243.1	209.133	147	156.9	154.1	152.667	22.0329	24.0364	4.1668	10.0991	11.4933	2.72934	0.958594	-0.0610077	0.0424148	-1.37248	1.37248	0.699771	-0.515046	0.0501955	-1.29934	1.29934	0.729997	-0.454038	0.0751021	-1.12435	1.12435
KAG1346710	A0A8B7C0Q6	AT1G65980	EGU2441G2269-MONOMER	peroxiredoxin-2C	242.9	235.8	241.4	240.033	317.7	263.1	337.3	306.033	341.6	374.2	322.3	346.033	3.05541	31.3953	21.4187	1.27291	10.2588	6.18979	1.27496	0.350454	0.0828951	-1.08147	1.08147	1.44161	0.527676	0.0247563	-1.60631	1.60631	1.1307	0.177222	0.395589	-0.402756	0.402756
KAG1331004	A0A8B7CQQ7	AT3G52960	EGU1685G1513-MONOMER	peroxiredoxin-2E-1, chloroplastic	228.6	257.1	235.7	240.467	267.5	257	229.5	251.333	107.6	139.9	120.3	122.6	12.1134	16.0226	13.2863	5.03747	6.37502	10.8371	1.04519	0.0637651	0.522186	-0.282175	0.282175	0.509842	-0.971878	0.000196051	-3.70763	3.70763	0.487798	-1.03564	0.0146394	-1.83448	1.83448
KAG1346747	A0A8B7D5R1	AT1G26480	#N/A	putative 14-3-3-like protein D	231.4	228.5	232.8	230.9	251.9	246	246.7	248.2	82.4	75.9	90.1	82.8	1.79072	2.63186	5.80402	0.775538	1.06038	7.00969	1.07492	0.104235	0.0119446	-1.92283	1.92283	0.358597	-1.47957	0.000381388	-3.41863	3.41863	0.333602	-1.5838	0.00070802	-3.14995	3.14995
KAG1334365	A0A8B7C6Q4	AT5G20720	#N/A	20 kDa chaperonin, chloroplastic	211.1	193.8	228.9	211.267	336.8	370.1	243.7	316.867	79.9	62.8	55.5	66.0667	14.33	53.4929	10.2256	6.7829	16.8818	15.4776	1.49984	0.584811	0.157231	-0.803461	0.803461	0.312717	-1.67707	0.00929869	-2.03158	2.03158	0.2085	-2.26188	0.0184188	-1.73474	1.73474
KAG1342370	A0A8B7CMB5	#N/A	#N/A	putative DIS3-like exonuclease 2	213.8	211.8	221.1	215.567	160.7	174.4	162.8	165.967	13	5.8	4.5	7.76667	3.99694	6.02458	3.73839	1.85416	3.62999	48.1338	0.769909	-0.377241	0.015665	-1.80507	1.80507	0.0360291	-4.79469	0.000500155	-3.3009	3.3009	0.0467965	-4.41745	0.00145138	-2.83822	2.83822
KAG1360603	A0A8B7BH52	#N/A	#N/A	Acyl-CoA-binding protein	7.4	77.9	219	101.433	353	136.5	302	263.833	81.7	104.5	81	89.0667	87.9735	92.4142	10.9168	86.7304	35.0275	12.2568	2.60105	1.3791	0.219141	-0.659275	0.659275	0.878081	-0.187574	0.865261	-0.0628528	0.0628528	0.337587	-1.56667	0.138529	-0.85846	0.85846
KAG1370270	A0A8B7BKL6	AT1G47980	#N/A	desiccation-related protein PCC13-62	217.8	221	215.3	218.033	76.7	88.4	108.8	91.3	391.8	421.4	348	387.067	2.33286	13.2642	30.1518	1.06995	14.5282	7.78981	0.418743	-1.25586	0.00667959	-2.17525	2.17525	1.77526	0.828033	0.0133127	-1.87573	1.87573	4.2395	2.0839	0.00931792	-2.03068	2.03068
KAG1366541	A0A8B7C3N0	AT5G10360	#N/A	40S ribosomal protein S6	205.6	204.8	214.8	208.4	185.1	132.3	241.5	186.3	119.4	97.2	101	105.867	4.53725	44.5888	9.69444	2.17718	23.9339	9.15722	0.893954	-0.161728	0.521124	-0.283059	0.283059	0.507997	-0.977107	0.00658307	-2.18157	2.18157	0.568259	-0.815379	0.123942	-0.906783	0.906783
KAG1368731	A0A8B7BVB6	AT3G12780	MONOMER8I-2984	phosphoglycerate kinase, chloroplastic	162.7	186.8	210.3	186.6	341.9	294.3	418.2	351.467	115.9	128	124.2	122.7	19.4331	51.0323	5.05239	10.4143	14.5198	4.11768	1.88353	0.913439	0.0312642	-1.50495	1.50495	0.657556	-0.604814	0.0315547	-1.50094	1.50094	0.349108	-1.51825	0.025031	-1.60152	1.60152
KAG1358700	A0A8B7CW22	AT1G66430	MONOMER8I-2883	Fructokinase-2	174.7	191.3	209.7	191.9	287.6	282.8	287.4	285.933	44.8	33.1	23.7	33.8667	14.295	2.21711	8.63108	7.44919	0.775392	25.4855	1.49001	0.575324	0.0116518	-1.93361	1.93361	0.176481	-2.50242	0.0103391	-1.98552	1.98552	0.118443	-3.07774	0.00059441	-3.22591	3.22591
KAG1334357	A0A8B7C6L6	AT1G60420	#N/A	putative nucleoredoxin 1	154.6	165.3	208.9	176.267	165.8	150	157.6	157.8	298.7	310.1	312.8	307.2	23.4851	6.45187	6.11065	13.3236	4.08864	1.98914	0.895234	-0.159662	0.415176	-0.381767	0.381767	1.74281	0.801419	0.010492	-1.97914	1.97914	1.94677	0.961081	0.00312428	-2.50525	2.50525
KAG1371609	A0A8B9ARA5	AT1G07890	MONOMER8I-2959	L-ascorbate peroxidase, cytosolic	177.3	189.3	204.3	190.3	680.5	487	929.7	699.067	62.7	39.3	17.8	39.9333	11.0454	181.208	18.3358	5.80418	25.9214	45.9161	3.6735	1.87715	0.0541784	-1.26617	1.26617	0.209844	-2.25261	0.018527	-1.73219	1.73219	0.0571238	-4.12976	0.0398053	-1.40006	1.40006
KAG1363330	A0A8B9AX62	AT4G34200	EGU2121G0058-MONOMER	putative D-3-phosphoglycerate dehydrogenase 1, chloroplastic	181.8	177.9	204.3	188	441.7	432.2	245.7	373.2	82.9	70.4	62.2	71.8333	11.6353	90.2395	8.5113	6.18898	24.1799	11.8487	1.98511	0.989216	0.12348	-0.908404	0.908404	0.382092	-1.38801	0.0126711	-1.89719	1.89719	0.192479	-2.37722	0.0361861	-1.44146	1.44146
KAG1362117	A0A8B7BVF7	AT4G09320	MONOMER8I-1867	nucleoside diphosphate kinase B	173	200.9	201.8	191.9	143.1	179.6	89.3	137.333	246.9	255.3	242.8	248.333	13.3694	37.0897	5.20278	6.96684	27.007	2.09508	0.715651	-0.482673	0.201338	-0.696073	0.696073	1.29408	0.371923	0.0274725	-1.5611	1.5611	1.80825	0.854596	0.039518	-1.4032	1.4032
KAG1333968	A0A8B7CEB8	AT4G14880	MONOMER8I-2876	cysteine synthase	225.8	186.4	201.2	204.467	297.7	253	398.5	316.4	203.2	211.2	173.7	196.033	16.25	60.8541	16.1262	7.9475	19.2333	8.22627	1.54744	0.629884	0.119957	-0.920975	0.920975	0.958754	-0.0607667	0.663299	-0.178291	0.178291	0.619574	-0.690651	0.157351	-0.80313	0.80313
KAG1339211	A0A8B7BSL3	AT3G12580	#N/A	Heat shock cognate 70 kDa protein	280.9	185.4	199.4	221.9	226.1	258.6	133.7	206.133	126.4	109.1	118.9	118.133	42.109	52.9087	7.08347	18.9766	25.6672	5.99617	0.928947	-0.106332	0.757462	-0.120639	0.120639	0.532372	-0.909494	0.0550016	-1.25962	1.25962	0.573092	-0.803162	0.154645	-0.810663	0.810663
KAG1335361	A0A8B7C481	AT5G25880	MONOMER8I-2362	NADP-dependent malic enzyme	185	189.8	197.5	190.767	194.8	219.4	169.3	194.5	39.1	35.2	38.1	37.4667	5.14868	20.4543	1.65395	2.69894	10.5164	4.41446	1.01957	0.027961	0.84619	-0.0725322	0.0725322	0.1964	-2.34813	0.000663569	-3.17811	3.17811	0.192631	-2.37609	0.0093771	-2.02793	2.02793
KAG1334586	A0A8B7CRG4	AT1G78300	#N/A	14-3-3-like protein	143.8	154.8	197.5	165.367	78.6	105	94.8	92.8	424	451.2	566.3	480.5	23.1612	10.8701	61.6776	14.006	11.7135	12.8361	0.561177	-0.833472	0.0438051	-1.35848	1.35848	2.90566	1.53887	0.00738791	-2.13148	2.13148	5.1778	2.37234	0.0114794	-1.94008	1.94008
KAG1365116	A0A8B7BGQ2	AT1G16300	MONOMER8I-1897	Glyceraldehyde-3-phosphate dehydrogenase GAPCP2, chloroplastic	199	209.9	196.4	201.767	213	174.7	113	166.9	25.3	20.7	19.3	21.7667	5.84827	41.1957	2.56298	2.89853	24.6829	11.7748	0.827193	-0.273704	0.340713	-0.467611	0.467611	0.10788	-3.2125	0.00068212	-3.16614	3.16614	0.130417	-2.93879	0.0340671	-1.46766	1.46766
KAG1361520	A0A8B7CS47	#N/A	#N/A	cocosin 1	195.4	186.9	196.3	192.867	206.1	240.7	289.4	245.4	986.1	1104.5	1111.9	1067.5	4.23504	34.1691	57.6377	2.19584	13.9238	5.39932	1.27238	0.347531	0.157949	-0.801484	0.801484	5.53491	2.46856	0.00229479	-2.63926	2.63926	4.35004	2.12103	0.000864816	-3.06308	3.06308
KAG1361553	A0A8B8ZCC6	AT5G43330	MONOMER8I-2885	Malate dehydrogenase, cytoplasmic	191.9	223.8	193.5	203.067	529.7	314.8	838.4	560.967	217.5	179.7	235	210.733	14.6752	214.899	23.0776	7.2268	38.3087	10.9511	2.76248	1.46596	0.15508	-0.809446	0.809446	1.03775	0.0534651	0.798022	-0.097985	0.097985	0.375661	-1.4125	0.124246	-0.905719	0.905719
KAG1366389	A0A8B8J8J7	AT1G72330	MONOMER8I-2575	alanine aminotransferase 2	171.5	171.6	188.4	177.167	384.1	394.6	406.9	395.2	56.6	46.2	31.9	44.9	7.94327	9.31773	10.1255	4.4835	2.35772	22.5513	2.23067	1.15748	0.000190691	-3.71967	3.71967	0.253434	-1.98032	0.00879964	-2.05554	2.05554	0.113613	-3.1378	0.00153604	-2.8136	2.8136
KAG1339061	A0A8B7BFB0	AT5G54960	EGU2621G1057-MONOMER	pyruvate decarboxylase 1	164.8	170	188.1	174.3	131.1	87.1	211.4	143.2	20.8	17.4	16.7	18.3	9.98632	51.4615	1.79072	5.72939	35.9368	9.78534	0.821572	-0.283541	0.417477	-0.379367	0.379367	0.104991	-3.25166	0.00267877	-2.57207	2.57207	0.127793	-2.96812	0.0769839	-1.1136	1.1136
KAG1371185	A0A8B7CCB4	AT3G12390	#N/A	nascent polypeptide-associated complex subunit alpha-like protein 1	215.8	219.5	186.9	207.4	92.9	107.6	89.3	96.6	44.8	53	43.7	47.1667	14.5742	7.91581	4.14916	7.02709	8.19442	8.79681	0.465767	-1.10232	0.00434111	-2.3624	2.3624	0.227419	-2.13658	0.00287835	-2.54086	2.54086	0.488268	-1.03426	0.00293119	-2.53296	2.53296
KAG1331212	A0A8B7CAM1	AT1G77120	MONOMER8I-2100	alcohol dehydrogenase 1	156.5	160.9	175.9	164.433	429.7	367.2	306.2	367.7	139.8	142.5	111.5	131.267	8.30475	50.4199	14.0205	5.05053	13.7122	10.681	2.23616	1.16103	0.0388541	-1.41056	1.41056	0.798297	-0.325002	0.167777	-0.775267	0.775267	0.356994	-1.48603	0.0138339	-1.85906	1.85906
KAG1331267	A0A8B9A3L2	AT3G03080	MONOMER8I-2133	hypothetical protein COCNU_02G012350	170	165.2	164.6	166.6	55.7	98.3	17.8	57.2667	49.4	45.2	44.6	46.4	2.41661	32.8827	2.13542	1.45055	57.4202	4.60219	0.343737	-1.54062	0.0421919	-1.37477	1.37477	0.278511	-1.84419	2.76853e-06	-5.55775	5.55775	0.810244	-0.303571	0.685323	-0.164105	0.164105
KAG1346442	A0A8B7CG06	AT1G65930	MONOMER8I-2052	isocitrate dehydrogenase [NADP]	159.8	169	159.6	162.8	211.4	253.6	173.5	212.833	101.5	116.3	90.6	102.8	4.38482	32.7164	10.5322	2.69338	15.3718	10.2453	1.30733	0.386623	0.133957	-0.873035	0.873035	0.63145	-0.66326	0.00629106	-2.20128	2.20128	0.483007	-1.04988	0.0197673	-1.70405	1.70405
KAG1361280	A0A8B7CV67	AT2G45790	EGU0709G0541-MONOMER	Phosphomannomutase	143.4	147.2	158.3	149.633	209.5	208.7	134	184.067	72.2	48.5	57	59.2333	6.32157	35.404	9.80351	4.22471	19.2343	16.5507	1.23012	0.298797	0.362125	-0.441141	0.441141	0.395857	-1.33695	0.0111567	-1.95246	1.95246	0.321804	-1.63575	0.0373132	-1.42814	1.42814
KAG1326959	A0A8B7BNC7	AT1G74030	EGU1976G0003-MONOMER	enolase 1, chloroplastic	147.6	141	155.9	148.167	185.1	154.6	175.1	171.6	31.8	19.9	27.5	26.4	6.09608	12.6951	4.92003	4.11434	7.3981	18.6365	1.15816	0.211829	0.0831817	-1.07997	1.07997	0.178178	-2.48861	0.000898565	-3.04645	3.04645	0.153846	-2.70044	0.00143267	-2.84385	2.84385
KAG1330289	A0A8B9ALH2	AT3G14940	EGU1876G0326-MONOMER	putative Phosphoenolpyruvate carboxylase 2	147.8	137.2	153.8	146.267	93.7	103.8	62.8	86.7667	66.2	71.9	59.8	65.9667	6.86311	17.4414	4.94256	4.69219	20.1015	7.49251	0.593209	-0.753388	0.0716476	-1.1448	1.1448	0.451003	-1.14879	0.0105416	-1.97709	1.97709	0.760277	-0.395404	0.146772	-0.833358	0.833358
KAG1337826	A0A8B7BUC8	AT2G39770	MONOMER8I-413	Mannose-1-phosphate guanylyltransferase 1	154	177.5	153.4	161.633	115.8	120.6	121.1	119.167	9.4	4.3		6.85	11.2221	2.38933	2.55	6.94294	2.00503	37.2263	0.737265	-0.439744	0.0291602	-1.53521	1.53521	0.0423799	-4.56048	0.0571379	-1.24308	1.24308	0.0574825	-4.12073	0.0282819	-1.54849	1.54849
KAG1338052	A0A8B7CRN7	AT2G30110	MONOMER8I-448	ubiquitin-activating enzyme E1 1	524.7	121.9	152.5	266.367	315.4	193.2	478.7	329.1	171.5	176.5	166.8	171.6	183.096	116.957	3.96064	68.7383	35.5384	2.30807	1.23551	0.305112	0.724274	-0.140097	0.140097	0.644225	-0.634364	0.541098	-0.266724	0.266724	0.521422	-0.939476	0.206754	-0.684547	0.684547
KAG1365286	A0A8B9AXA8	AT2G47470	#N/A	Disulfide-isomerase-like protein	173.2	159.1	150.6	160.967	250.2	215.7	233.4	233.1	118.2	103.6	105.4	109.067	9.32035	14.0862	6.49991	5.79023	6.04297	5.95958	1.44813	0.534187	0.0119154	-1.92389	1.92389	0.677573	-0.561552	0.00414812	-2.38215	2.38215	0.467896	-1.09574	0.00239218	-2.62121	2.62121
KAG1371245	A0A8B7MTV4	#N/A	MONOMER8I-1914	biotin carboxyl carrier protein of acetyl-CoA carboxylase	144.3	169.8	150.2	154.767	153	170.9	69.6	131.167	12.4	5.7	5.1	7.73333	10.8996	44.1433	3.30891	7.04263	33.6543	42.7876	0.847512	-0.238694	0.495824	-0.304673	0.304673	0.0499677	-4.32286	0.00401558	-2.39625	2.39625	0.0589581	-4.08417	0.0553416	-1.25695	1.25695
KAG1361846	A0A8B7BTR9	AT2G20420	EGU0206G0928-MONOMER	putative Succinate--CoA ligase [ADP-forming] subunit beta, mitochondrial	173.9	163.2	146.4	161.167	235.1	201.4	179.7	205.4	47	38.6	30.4	38.6667	11.3185	22.7931	6.77709	7.02287	11.0969	17.5269	1.27446	0.349883	0.0357874	-1.44627	1.44627	0.239917	-2.05939	0.000732445	-3.13523	3.13523	0.188251	-2.40927	0.00461963	-2.33539	2.33539
KAG1347593	A0A8B7D570	AT5G19780	#N/A	tubulin alpha-3 chain	133.8	148	144.3	142.033	211.2	192.4	169.3	190.967	30.1	25.6	22.1	25.9333	6.01461	17.1356	3.27448	4.23465	8.97309	12.6265	1.34452	0.427091	0.085378	-1.06865	1.06865	0.182586	-2.45335	0.0028399	-2.5467	2.5467	0.1358	-2.88044	0.00352612	-2.4527	2.4527
KAG1354750	A0A8B7BR44	AT4G22670	EGU0206G1133-MONOMER	putative FAM10 family protein	118.5	148.2	140	135.567	5.9	28.7	8.4	14.3333	37.2	40.3	48.2	41.9	12.5237	10.2099	4.63105	9.23801	71.2319	11.0526	0.105729	-3.24156	0.00209136	-2.67957	2.67957	0.309073	-1.69398	0.00675097	-2.17063	2.17063	2.92326	1.54758	0.08082	-1.09248	1.09248
AHN532021	A0A8B7C5C9	AT3G15730	MONOMER8I-901	phospholipase D alpha 1-like protein	158.3	154.5	138.4	150.4	80	97.3	73.2	83.5	82.3	92.8	82.2	85.7667	8.62593	10.1453	4.97349	5.73533	12.15	5.79886	0.555186	-0.848956	0.00834535	-2.07856	2.07856	0.570257	-0.810316	0.00823267	-2.08446	2.08446	1.02715	0.0386409	0.619643	-0.207859	0.207859
KAG1338031	A0A8B7CRW8	AT5G58590	#N/A	ran-binding protein 1	119	129.6	137.6	128.733	167.9	183	148.6	166.5	24	24.8	21.9	23.5667	7.61811	14.0786	1.22293	5.91774	8.45561	5.18923	1.29337	0.371137	0.10683	-0.971307	0.971307	0.183066	-2.44957	0.00321598	-2.49269	2.49269	0.141542	-2.8207	0.00403426	-2.39424	2.39424
KAG1368612	A0A8B7BLE3	#N/A	#N/A	putative Eukaryotic translation initiation factor 5A-4	112	134.7	135.9	127.533	60.3	78.2	44.3	60.9333	35.4	35.7	40.9	37.3333	10.9946	13.8469	2.52499	8.621	22.7246	6.76336	0.477784	-1.06557	0.0338588	-1.47033	1.47033	0.292734	-1.77234	0.00579644	-2.23684	2.23684	0.612691	-0.706767	0.172112	-0.76419	0.76419
KAG1366850	A0A8B7C307	AT1G14810	MONOMER8I-1970	aspartate-semialdehyde dehydrogenase-like	115.2	122.3	130.5	122.667	80.7	78.5	124.6	94.6	236.1	275.5	279.2	263.6	6.25158	21.2322	19.504	5.09639	22.4442	7.3991	0.771196	-0.374831	0.132949	-0.876316	0.876316	2.14891	1.10361	0.00509721	-2.29267	2.29267	2.78647	1.47844	0.00679449	-2.16784	2.16784
KAG1359711	A0A8B8ZAY3	AT5G40810	MONOMER8I-2824	putative Cytochrome c1-1, heme protein, mitochondrial	115.4	123.8	129.2	122.8	66	66.7	59.2	63.9667	30.1	22.2	22.8	25.0333	5.67803	3.38264	3.59104	4.6238	5.28812	14.345	0.520901	-0.940918	0.0102731	-1.9883	1.9883	0.203855	-2.29439	0.00423875	-2.37276	2.37276	0.39135	-1.35347	0.00508547	-2.29367	2.29367
KAG1331528	A0A8B7CPP6	AT4G13930	EGU2490G0001-MONOMER	serine hydroxymethyltransferase 4	111.9	133.4	128.1	124.467	186	160.9	182.6	176.5	46.6	38.6	41.2	42.1333	9.14561	11.1179	3.332	7.34784	6.29907	7.90823	1.41805	0.503909	0.0612711	-1.21274	1.21274	0.338511	-1.56273	0.0112738	-1.94793	1.94793	0.238716	-2.06663	0.00202846	-2.69283	2.69283
KAG1326248	A0A8B8ZN49	AT3G16640	#N/A	putative Translationally-controlled tumor protein	124.9	125.4	128	126.1	135.7	129.7	130.5	131.967	203.3	238.2	254.4	231.967	1.35892	2.65999	21.322	1.07765	2.01565	9.19185	1.04652	0.0656053	0.14541	-0.837407	0.837407	1.83955	0.879349	0.0177209	-1.75152	1.75152	1.75777	0.813744	0.0270793	-1.56736	1.56736
KAG1358741	A0A8B7CK89	AT5G38480	#N/A	14-3-3-like protein	111.5	130.3	127.1	122.967	296.1	229.1	315.9	280.367	42.6	26.8	23.3	30.9	8.21273	37.1413	8.39563	6.67882	13.2474	27.1703	2.28002	1.18905	0.0330024	-1.48145	1.48145	0.251288	-1.99259	0.015464	-1.81068	1.81068	0.110213	-3.18164	0.0108063	-1.96632	1.96632
KAG1338411	A0A8B7C3P5	AT2G41740	#N/A	putative Villin-2	138.5	139.3	125.6	134.467	116.2	99.4	99.1	104.9	32.1	28	29.1	29.7333	6.27818	7.99125	1.73269	4.66895	7.61796	5.82744	0.780119	-0.358234	0.03074	-1.5123	1.5123	0.22112	-2.1771	0.00172292	-2.76374	2.76374	0.283445	-1.81886	0.00354116	-2.45085	2.45085
KAG1366726	A0A8B7C2K7	#N/A	#N/A	scarecrow-like protein 4	118.5	132.1	123.4	124.667	75.4	46.5	106.5	76.1333	397.2	458.3	398	417.833	5.62396	24.5004	28.6161	4.5112	32.1809	6.84869	0.610695	-0.711476	0.136201	-0.865818	0.865818	3.3516	1.74485	0.00317518	-2.49823	2.49823	5.48818	2.45633	0.010993	-1.95888	1.95888
AFI578431	A0A8B8ZRU5	AT1G13440	EGU2716G0002-MONOMER	glyceraldehyde-3-phosphate dehydrogenase, partial	127.4	117.5	122.3	122.4	121.4	188.1		154.75	24	17.3	13.9	18.4	4.04228	33.35	4.19603	3.30251	21.5509	22.8045	1.2643	0.338336	0.553974	-0.256511	0.256511	0.150327	-2.73383	0.000525965	-3.27904	3.27904	0.118901	-3.07216	0.170064	-0.769389	0.769389
KAG1347423	A0A8B7CQP3	AT1G09640	MONOMER8I-1659	putative Elongation factor 1-gamma 2	128.6	108.8	115.9	117.767	72.7	54.2	123.3	83.4	308.9	343.9	341.7	331.5	8.19037	29.207	16.0058	6.95475	35.0203	4.82831	0.70818	-0.497812	0.241629	-0.616852	0.616852	2.81489	1.49308	0.00621655	-2.20645	2.20645	3.97482	1.99089	0.00737522	-2.13223	2.13223
KAG1334460	A0A8B7CTE8	AT3G47520	MONOMER8I-771	malate dehydrogenase, chloroplastic	107.9	108.9	115.7	110.833	145.6	142.2	191.3	159.7	49.1	37.7	26	37.6	3.46538	22.3876	9.4308	3.12666	14.0186	25.0819	1.4409	0.526972	0.0678972	-1.16815	1.16815	0.339248	-1.55959	0.0146982	-1.83273	1.83273	0.235441	-2.08656	0.0302251	-1.51963	1.51963
KAG1330482	A0A8B7BJ79	AT5G60860	#N/A	Ras-related protein RABA1f	102.8	117.5	114.6	111.633	279	225.9	270.6	258.5	26.9	22.3	16.6	21.9333	6.35732	23.3054	4.21294	5.69483	9.01561	19.2079	2.31562	1.2114	0.0182163	-1.73954	1.73954	0.196477	-2.34757	0.00594492	-2.22585	2.22585	0.0848485	-3.55897	0.00482516	-2.31649	2.31649
KAG1353916	A0A8B7C4D1	AT1G27530	#N/A	ubiquitin-fold modifier-conjugating enzyme 1	91.6	110.6	113.9	105.367	94.1	89.8	66	83.3	38.9	26.9	22.2	29.3333	9.82729	12.3583	7.03152	9.32675	14.8359	23.9711	0.790573	-0.33903	0.268939	-0.570346	0.570346	0.278393	-1.84481	0.023604	-1.62701	1.62701	0.352141	-1.50578	0.0104043	-1.98279	1.98279
KAG1337905	A0A8B7BYM3	AT5G59890	#N/A	actin-depolymerizing factor 7	112	126.7	112.9	117.2	129	105.6	192.3	142.3	44	34.9	44	40.9667	6.72756	36.6232	4.28978	5.74023	25.7366	10.4714	1.21416	0.279963	0.481806	-0.317128	0.317128	0.349545	-1.51645	0.0102752	-1.98821	1.98821	0.287889	-1.79641	0.0511536	-1.29112	1.29112
KAG1366442	A0A8B9AX88	AT1G62640	EGU2755G0074-MONOMER	3-oxoacyl-[acyl-carrier-protein] synthase III, chloroplastic	109.7	84.3	112.5	102.167	187.8	126.9	251.5	188.733	66.2	67.5	58.6	64.1	12.6852	50.872	3.92513	12.4162	26.9544	6.12345	1.84731	0.885425	0.0914587	-1.03878	1.03878	0.627406	-0.672528	0.0749048	-1.12549	1.12549	0.339633	-1.55795	0.0838865	-1.07631	1.07631
KAG1365102	A0A8B7BIU7	#N/A	#N/A	myosin-9	116.1	91.6	111.4	106.367	141.8	115.2	194.9	150.633	116.3	110.4	104.8	110.5	10.6164	33.1315	4.69539	9.98099	21.9948	4.24922	1.41617	0.501995	0.152766	-0.815974	0.815974	1.03886	0.0550003	0.640711	-0.193338	0.193338	0.733569	-0.446995	0.258623	-0.587333	0.587333
KAG1327862	A0A8B7CM12	AT1G80480	#N/A	hypothetical protein COCNU_01G017960	225.3	77.8	111.3	138.133	12	28.8	31.7	24.1667	372	387.1	375.2	378.1	63.1352	8.68421	6.49667	45.706	35.9347	1.71824	0.174952	-2.51497	0.152378	-0.817079	0.817079	2.73721	1.45271	0.0384153	-1.4155	1.4155	15.6455	3.96768	0.000219092	-3.65937	3.65937
KAG1366243	A0A8B7D3D7	AT5G40370	MONOMER8I-1466	glutaredoxin	104.7	115.5	107.7	109.3	165.2	149.3	115.2	143.233	45.7	22.5	39.7	35.9667	4.55192	20.8583	9.83237	4.16461	14.5625	27.3375	1.31046	0.390074	0.156828	-0.804578	0.804578	0.329064	-1.60356	0.0186977	-1.72821	1.72821	0.251105	-1.99363	0.0215917	-1.66571	1.66571
KAG1359722	A0A8B7C171	AT3G24170	MONOMER8I-2251	glutathione reductase, cytosolic	124.4	87.3	106.7	106.133	88.7	74.1	100	87.6	224.8	240.5	235.8	233.7	15.1513	10.6022	6.57926	14.2757	12.103	2.81526	0.825377	-0.276875	0.169396	-0.771097	0.771097	2.20195	1.13878	0.0140122	-1.85349	1.85349	2.66781	1.41565	0.00479218	-2.31947	2.31947
KAG1371705	A0A8B7D0F9	AT3G55440	MONOMER8I-1556	triosephosphate isomerase, cytosolic	88	92.3	104.5	94.9333	158.6	149.4	144.4	150.8	155.3	162.7	177.7	165.233	6.98872	5.88104	9.31856	7.36171	3.8999	5.63964	1.58848	0.66765	0.024366	-1.61321	1.61321	1.74052	0.799518	0.000586954	-3.2314	3.2314	1.09571	0.131868	0.305755	-0.514626	0.514626
KAG1359700	A0A8B7CCW6	AT1G09690	#N/A	60S ribosomal protein L21-1	100.7	100.7	102.9	101.433	32.2	41	16.2	29.8	10.3	15.9	14.9	13.7	1.03709	10.2658	2.43858	1.02244	34.449	17.7998	0.293789	-1.76715	0.0120943	-1.91742	1.91742	0.135064	-2.88828	0.000341655	-3.46641	3.46641	0.459732	-1.12114	0.163494	-0.786497	0.786497
KAG1358889	A0A8B7CIK0	AT5G49910	#N/A	hypothetical protein COCNU_08G003350	102.7	109.4	101.6	104.567	147.3	131.4	95.2	124.633	39.7	42.6	38.9	40.4	3.44706	21.8013	1.58955	3.29652	17.4923	3.93453	1.1919	0.253267	0.306825	-0.513109	0.513109	0.386356	-1.372	0.000422603	-3.37407	3.37407	0.324151	-1.62526	0.0302169	-1.51975	1.51975
KAG1362254	A0A8B7D0G6	AT5G09590	#N/A	heat shock 70 kDa protein, mitochondrial	88.3	98.7	98.3	95.1	304	173.7	495.3	324.333	75.4	64.3	61.2	66.9667	4.8111	132.078	6.09608	5.05899	40.7228	9.10316	3.41045	1.76996	0.133085	-0.875871	0.875871	0.704171	-0.506002	0.0667359	-1.17564	1.17564	0.206475	-2.27596	0.113177	-0.946241	0.946241
KAG1326127	A0A8B7D4Z0	AT1G48030	EGU1685G1727-MONOMER	dihydrolipoyl dehydrogenase 1, mitochondrial	85.5	95.8	96.4	92.5667	205.9	152.2	279	212.367	59.7	62.4	55.8	59.3	5.00289	51.9674	2.70924	5.40463	24.4706	4.56871	2.2942	1.19799	0.081355	-1.08962	1.08962	0.640619	-0.642461	0.0161006	-1.79316	1.79316	0.279234	-1.84045	0.0582769	-1.2345	1.2345
KAG1338030	A0A8B7CSN7	AT3G11130	#N/A	Clathrin heavy chain 1	111.8	94.3	96.4	100.833	146.7	131.5	97.8	125.333	28.5	27.9	27.2	27.8667	7.80185	20.434	0.531246	7.73737	16.3037	1.90638	1.24298	0.313798	0.168385	-0.773695	0.773695	0.276364	-1.85536	0.00509733	-2.29266	2.29266	0.22234	-2.16916	0.0202344	-1.69391	1.69391
KAG1331638	A0A8B7CDW1	AT5G07350	#N/A	ribonuclease TUDOR 1	98.8	88.6	90.9	92.7667	10.9	19.9		15.4	10.8	9	9.8	9.86667	4.36832	4.5	0.736357	4.70893	29.2208	7.46308	0.166008	-2.59068	0.0776654	-1.10977	1.10977	0.10636	-3.23297	0.000972039	-3.01232	3.01232	0.640693	-0.642296	0.49416	-0.306133	0.306133
KAG1330142	A0A8B7CG88	AT5G56600	#N/A	profilin	80.3	81.7	90.8	84.2667	145	139.2	64.7	116.3	53.7	46.5	30.9	43.7	4.65499	36.5635	9.5163	5.52411	31.4389	21.7764	1.38014	0.464817	0.386298	-0.413077	0.413077	0.518592	-0.947329	0.0555338	-1.25544	1.25544	0.375752	-1.41215	0.0645919	-1.18982	1.18982
KAG1339070	A0A8B9AAL5	AT3G51800	#N/A	ERBB-3 BINDING PROTEIN 1	82.1	90.8	90	87.6333	31.9	42.1	22.7	32.2333	26	19.9	20.1	22	3.92626	7.92352	2.82961	4.48033	24.5818	12.8618	0.36782	-1.44293	0.0113981	-1.94317	1.94317	0.251046	-1.99398	0.00525217	-2.27966	2.27966	0.682523	-0.55105	0.233274	-0.632135	0.632135
KAG1326559	A0A8B7CPQ4	#N/A	#N/A	early nodulin-like protein 3	81.5	89.2	88	86.2333	64.7	115.7	49.5	76.6333	47.3	44.5	46.1	45.9667	3.38264	28.3127	1.14698	3.92265	36.9457	2.49524	0.888674	-0.170274	0.665212	-0.17704	0.17704	0.53305	-0.907658	0.00602287	-2.2202	2.2202	0.599826	-0.737384	0.27609	-0.558949	0.558949
KAG1361204	A0A8B7CNW1	AT1G16470	#N/A	putative Proteasome subunit alpha type-2-A	77.6	88.2	87.1	84.3	276.3	167.9	400.7	281.633	45.5	43	35.7	41.4	4.75885	95.115	4.15772	5.64514	33.7726	10.0428	3.34085	1.74021	0.0998592	-1.00061	1.00061	0.491103	-1.0259	0.0171342	-1.76614	1.76614	0.147	-2.76612	0.0744123	-1.12836	1.12836
KAG1347914	A0A8B7C6A5	AT1G27450	EGU1685G0960-MONOMER	adenine phosphoribosyltransferase 1	104.4	94.5	86.1	95	75.8	77.1	51.1	68	52.9	44.7	56.7	51.4333	7.4793	11.9619	5.00755	7.87295	17.591	9.736	0.715789	-0.482393	0.0344243	-1.46313	1.46313	0.541404	-0.885224	0.0255476	-1.59265	1.59265	0.756373	-0.402831	0.283879	-0.546867	0.546867
KAG1334533	A0A8B9ADL2	AT5G66410	#N/A	thioredoxin domain-containing protein PLP3A	76.7	69.1	82.3	76.0333	60.3	48	76.4	61.5667	38.3	43.3	37.5	39.7	5.40946	11.6288	2.56645	7.11459	18.8881	6.46461	0.809733	-0.304483	0.0844249	-1.07353	1.07353	0.522139	-0.937493	0.0227936	-1.64219	1.64219	0.644829	-0.63301	0.157165	-0.803645	0.803645
KAG1358849	A0A8B7BS86	AT1G74960	MONOMER8I-800	putative 3-oxoacyl-[acyl-carrier-protein] synthase II, chloroplastic	72.2	85	80.2	79.1333	115.3	117.9	91.9	108.367	9.3	8.3	7.2	8.26667	5.27973	11.692	0.857645	6.67194	10.7893	10.3747	1.36942	0.453564	0.0871875	-1.05955	1.05955	0.104465	-3.25891	0.00336949	-2.47244	2.47244	0.0762842	-3.71247	0.00597104	-2.22395	2.22395
KAG1367917	A0A8B7C6X4	AT1G53310	EGU1876G0326-MONOMER	Phosphoenolpyruvate carboxylase, housekeeping isozyme	71.2	75.3	77.9	74.8	53.6	50.7	42.4	48.9	53.2	37.8	53.1	48.0333	2.75802	4.74623	7.23617	3.68719	9.70598	15.0649	0.653743	-0.613204	0.0381357	-1.41867	1.41867	0.642157	-0.639002	0.0426811	-1.36976	1.36976	0.982277	-0.0257985	0.910461	-0.0407387	0.0407387
KAG1371668	A0A8B7BYM3	AT5G59890	#N/A	ctin-depolymerizing factor 7	80.2	68.4	77.9	75.5	84.7	75.9	89	83.2	38.9	38.3	35.5	37.5667	5.10751	5.45222	1.48174	6.76491	6.55315	3.9443	1.10199	0.140107	0.056262	-1.24978	1.24978	0.497572	-1.00702	0.0105612	-1.97629	1.97629	0.451522	-1.14713	0.00996918	-2.00134	2.00134
KAG1346614	A0A8B7CR70	AT1G74310	#N/A	chaperone protein ClpB1	68.6	76.8	77.4	74.2667	34.9	43.4	51.5	43.2667	22.3	18.8	13.6	18.2333	4.01442	6.77758	3.57429	5.40541	15.6647	19.6031	0.582585	-0.779459	0.00670613	-2.17353	2.17353	0.245512	-2.02614	0.00833103	-2.0793	2.0793	0.421418	-1.24668	0.0756522	-1.12118	1.12118
KAG1354429	A0A8B7CNA4	AT1G62020	#N/A	coatomer subunit alpha-1	87.2	78.9	76.6	80.9	50.6	49.5	40.5	46.8667	9.6	11.2	6.3	9.03333	4.55265	4.52426	2.04015	5.62751	9.65346	22.5847	0.579316	-0.787578	0.00461938	-2.33542	2.33542	0.11166	-3.16281	0.00169585	-2.77061	2.77061	0.192745	-2.37523	0.00271898	-2.56559	2.56559
KAG1342164	A0A8B9AJA1	AT4G33680	MONOMER8I-3039	aminotransferase ALD1	70.5	84.5	76.3	77.1	164.9	109.2	176.4	150.167	35.8	37.3	34.9	36	5.7434	29.3458	0.989949	7.44929	19.5421	2.74986	1.94769	0.961762	0.0946815	-1.02374	1.02374	0.466926	-1.09873	0.00763326	-2.11729	2.11729	0.239734	-2.0605	0.033488	-1.47511	1.47511
KAG1370006	A0A8B9ARS6	AT2G02560	#N/A	hypothetical protein COCNU_15G003720	68	68.4	76.3	70.9	47.5	54.3	45.6	49.1333	105.6	107.8	110.7	108.033	3.82187	3.73482	2.08859	5.3905	7.6014	1.93329	0.692995	-0.529084	0.0459424	-1.33779	1.33779	1.52374	0.607619	0.00154677	-2.81057	2.81057	2.19878	1.1367	0.00326233	-2.48647	2.48647
KAG1341882	A0A8B7C2L8	AT4G39260	#N/A	glycine-rich RNA-binding protein GRP1A-like	64.4	73.9	75.7	71.3333	104.6	61.6	144.4	103.533	50.7	43.6	41.6	45.3	4.95737	33.8114	3.9047	6.94959	32.6575	8.61964	1.4514	0.537447	0.307541	-0.512097	0.512097	0.635047	-0.655065	0.0533	-1.27327	1.27327	0.43754	-1.19251	0.141305	-0.849844	0.849844
KAG1339294	A0A8B7BSP7	AT3G55440	MONOMER8I-1556	Triosephosphate isomerase, cytosolic	70	75.3	75.4	73.5667	34.2	45	28.8	36	50	52.2	54.6	52.2667	2.52234	6.73498	1.87853	3.42865	18.7083	3.59413	0.489352	-1.03106	0.0158564	-1.7998	1.7998	0.710467	-0.493161	0.0018975	-2.72182	2.72182	1.45185	0.537894	0.0940192	-1.02678	1.02678
KAG1331986	A0A8B7CFA8	AT3G13920	EGU1136G0346-MONOMER	putative Eukaryotic initiation factor 4A-2	92.7	90.1	74.2	85.6667	96.6	92.1	99.1	95.9333	16.2	11	6.9	11.3667	8.17734	2.89636	3.80555	9.54553	3.01914	33.4799	1.11984	0.163298	0.296661	-0.52774	0.52774	0.132685	-2.91392	0.002313	-2.63582	2.63582	0.118485	-3.07722	0.00203637	-2.69114	2.69114
KAG1364407	A0A8B7C968	AT1G79650	#N/A	ubiquitin receptor RAD23b	56.2	69.8	72.9	66.3	18.9	30.5	12.9	20.7667	50.7	51.3	49.5	50.5	7.25305	7.3054	0.748331	10.9397	35.1785	1.48184	0.313223	-1.67474	0.0244684	-1.6114	1.6114	0.761689	-0.392725	0.0977858	-1.00972	1.00972	2.43178	1.28201	0.0238573	-1.62238	1.62238
KAG1337780	A0A8B9ACS7	AT1G51740	#N/A	putative Syntaxin-81	41	51.7	72.3	55	44.1	44.4	57.9	48.8	29.7	34	26.4	30.0333	12.9895	6.43584	3.11163	23.6172	13.1882	10.3606	0.887273	-0.17255	0.346777	-0.45995	0.45995	0.546061	-0.872867	0.143279	-0.843817	0.843817	0.615437	-0.700317	0.101161	-0.994988	0.994988
KAG1365525	A0A8B7BWG5	AT2G40980	#N/A	putative protein kinase superfamily protein	66.1	67	69.5	67.5333	44.5	57.4	40.5	47.4667	77.2	72.7	85.4	78.4333	1.43836	7.21126	5.25759	2.12986	15.1923	6.70326	0.702863	-0.508685	0.0710009	-1.14874	1.14874	1.1614	0.215867	0.0659163	-1.18101	1.18101	1.65239	0.724552	0.0690509	-1.16083	1.16083
KAG1359148	A0A8B7BIK4	AT1G01090	EGU0531G0575-MONOMER	Pyruvate dehydrogenase E1 component subunit alpha	76	90.7	67.7	78.1333	32.8	53.7	11.7	32.7333	9.4	4.6		7	9.51011	17.1465	2.4	12.1716	52.3824	34.2857	0.418942	-1.25518	0.0148452	-1.82842	1.82842	0.0895904	-3.48051	0.0808596	-1.09227	1.09227	0.213849	-2.22533	0.216873	-0.663795	0.663795
KAG1364013	A0A8B9AE85	AT1G12000	EGU1685G0737-MONOMER	Pyrophosphate--fructose 6-phosphate 1-phosphotransferase subunit beta	97.7	70	67.6	78.4333	41.2	41.6	78.7	53.8333	43.4	55.6	39.8	46.2667	13.6588	17.5841	6.76133	17.4145	32.664	14.6138	0.686358	-0.542967	0.336348	-0.473212	0.473212	0.589885	-0.761494	0.111121	-0.954205	0.954205	0.859443	-0.218527	0.683442	-0.165298	0.165298
KAG1359544	A0A8B7BJ45	AT5G08570	MONOMER8I-2828	Pyruvate kinase, cytosolic isozyme	54.1	63.9	66.7	61.5667	170.6	143.9	189.7	168.067	53.4	41.3	27.2	40.6333	5.40206	18.7834	10.7065	8.77432	11.1762	26.349	2.72983	1.44881	0.0154247	-1.81178	1.81178	0.659989	-0.599486	0.20337	-0.691713	0.691713	0.241769	-2.0483	0.0194423	-1.71125	1.71125
prf	A0A8B8ZPB2	#N/A	#N/A	1-acyl-sn-glycerol-3-phosphate acyltransferase	56.2	57.1	63.3	58.8667	27.5	49.2	25.6	34.1	10.8	7.3	6.1	8.06667	3.1563	10.7055	1.99388	5.36178	31.3943	24.7175	0.579275	-0.787679	0.106967	-0.970752	0.970752	0.137033	-2.86741	0.00456177	-2.34087	2.34087	0.236559	-2.07973	0.0823981	-1.08408	1.08408
KAG1347051	A0A8B7D1Y1	AT3G04880	EGU2441G0851-MONOMER	putative Bifunctional nuclease 2	52.6	63.9	63.1	59.8667	103	112	66.7	93.9	49	44.2	42.4	45.2	5.14868	19.5811	2.78568	8.60024	20.8532	6.163	1.56849	0.649372	0.15502	-0.809613	0.809613	0.755011	-0.40543	0.11799	-0.928154	0.928154	0.481363	-1.0548	0.0629607	-1.20093	1.20093
KAG1362214	A0A8B7C4L7	AT4G12400	#N/A	putative Hsp70-Hsp90 organizing protein 3	46.6	55	62.8	54.8	74.4	48.3	91.6	71.4333	11.7	8.6	9.8	10.0333	6.61513	17.8012	1.27628	12.0714	24.92	12.7204	1.30353	0.382422	0.290143	-0.537388	0.537388	0.18309	-2.44937	0.0136701	-1.86423	1.86423	0.140457	-2.8318	0.0371167	-1.43043	1.43043
KAG1348103	A0A8B7BX91	AT4G14960	#N/A	Tubulin alpha chain	60	70.3	62.3	64.2	59.7	63.7	51.1	58.1667	9.2	6	5.5	6.9	4.41437	5.25695	1.63911	6.87597	9.03774	23.7552	0.906023	-0.142381	0.196365	-0.706937	0.706937	0.107477	-3.21791	0.00461262	-2.33605	2.33605	0.118625	-3.07552	0.00466521	-2.33113	2.33113
KAG1331467	A0A8B7D1M6	AT5G41670	MONOMER8I-3025	6-phosphogluconate dehydrogenase, decarboxylating 1, chloroplastic	47.2	48.4	59.6	51.7333	36.1	55.5	30.4	40.6667	10.5	3.5	11.6	8.53333	5.5841	10.7438	3.58732	10.794	26.4191	42.0389	0.786082	-0.347247	0.401659	-0.396142	0.396142	0.164948	-2.59991	0.00603384	-2.21941	2.21941	0.209836	-2.25267	0.0865903	-1.06253	1.06253
KAG1347737	A0A8B7BV58	AT3G22630	#N/A	proteasome subunit beta type-2-B	59.4	75.7	58.1	64.4	31.7	50.6	25.2	35.8333	41.8	47.1	42.7	43.8667	8.00791	10.7735	2.31565	12.4346	30.0657	5.27883	0.556418	-0.845758	0.00638132	-2.19509	2.19509	0.681159	-0.553936	0.0373402	-1.42782	1.42782	1.22419	0.291823	0.321471	-0.492858	0.492858
KAG1360756	A0A8B7D4Q0	AT2G45290	EGU0709G0619-MONOMER	transketolase, chloroplastic	59.8	67.1	57.9	61.6	74.8	83.2	48.6	68.8667	86.9	76.4	95.7	86.3333	3.96569	14.7353	7.88937	6.4378	21.3968	9.13827	1.11797	0.160875	0.473144	-0.325007	0.325007	1.40152	0.486987	0.0968142	-1.01406	1.01406	1.25363	0.326112	0.383878	-0.415807	0.415807
KAG1360793	A0A8B7D0B3	AT1G54220	MONOMER8I-2818	Dihydrolipoyllysine-residue acetyltransferase component 3 of pyruvate dehydrogenase complex, mitochondrial	52.2	50.8	57.4	53.4667	23.1	23.8	9.7	18.8667	11.7	11.3	6.9	9.96667	2.83941	6.48811	2.1746	5.31061	34.3893	21.8187	0.352868	-1.5028	0.0342953	-1.46476	1.46476	0.186409	-2.42346	0.00645478	-2.19012	2.19012	0.528269	-0.920657	0.101041	-0.995504	0.995504
KAG1360578	A0A8B7D514	AT1G14810	MONOMER8I-1970	aspartate-semialdehyde dehydrogenase-like	47	49.4	54.2	50.2	92.9	63.2	123.7	93.2667	7.4	8.1	7.8	7.76667	2.99333	24.7004	0.286744	5.9628	26.4836	3.69199	1.8579	0.893674	0.116446	-0.933877	0.933877	0.154714	-2.69232	0.00231035	-2.63632	2.63632	0.0832738	-3.58599	0.0396505	-1.40175	1.40175
KAG1367867	A0A8B7C782	AT4G10960	MONOMER8I-2951	UDP-glucose 4-epimerase GEPI48	49.2	51.1	52.5	50.9333	112.4	114.9	101.3	109.533	24.7	32.9	25.7	27.7667	1.35236	5.91063	3.6527	2.65517	5.39619	13.155	2.15052	1.10469	0.006928	-2.15939	2.15939	0.545157	-0.875256	0.0120892	-1.9176	1.9176	0.2535	-1.97994	0.00182194	-2.73947	2.73947
KAG1365227	A0A8B7CK29	#N/A	#N/A	Stress-related protein	83.1	49.5	50.7	61.1	66.6	53.2	68.6	62.8	9.7	8.6	9.6	9.3	15.5641	6.83715	0.496655	25.4731	10.8872	5.34038	1.02782	0.0395922	0.880423	-0.0553086	0.0553086	0.152209	-2.71587	0.0408274	-1.38905	1.38905	0.148089	-2.75546	0.00697328	-2.15656	2.15656
KAG1369674	A0A8B7BYN2	AT3G54250	EGU1863G0032-MONOMER	diphosphomevalonate decarboxylase MVD2, peroxisomal	52.6	37.7	48.7	46.3333	43.3	52.3	80.3	58.6333	17.3	17.8	15.8	16.9667	6.3089	15.7551	0.849837	13.6163	26.8705	5.00886	1.26547	0.339671	0.40872	-0.388574	0.388574	0.366187	-1.44935	0.0255242	-1.59305	1.59305	0.289369	-1.78902	0.0703557	-1.1527	1.1527
KAG1337863	A0A8B7BUI5	AT2G37660	#N/A	Sanguinarine reductase	43.4	34	46.6	41.3333	78.8	59.3	61.2	66.4333	18.2	15.3	14.5	16	5.34748	8.77889	1.58955	12.9375	13.2146	9.93468	1.60726	0.684602	0.0527537	-1.27775	1.27775	0.387097	-1.36923	0.0225369	-1.64711	1.64711	0.240843	-2.05384	0.0102387	-1.98976	1.98976
KAG1332017	A0A8B8JBT1	AT4G31180	#N/A	aspartate--tRNA ligase 2, cytoplasmic	44.1	43.9	44.9	44.3	25.4	39.1	23	29.1667	63.1	74.5	72.8	70.1333	0.432049	7.09194	5.02151	0.975281	24.3152	7.15995	0.65839	-0.602986	0.102181	-0.99063	0.99063	1.58315	0.662794	0.0179096	-1.74691	1.74691	2.40457	1.26578	0.0116781	-1.93263	1.93263
KAG1360972	A0A8B7CY51	AT3G51260	#N/A	Proteasome subunit alpha type	42.5	38	44.7	41.7333	65.6	57.7	48.2	57.1667	19.3	12.6	10.6	14.1667	2.78847	7.11352	3.72051	6.68163	12.4435	26.2624	1.36981	0.453974	0.125301	-0.902045	0.902045	0.339457	-1.5587	0.0142621	-1.84582	1.84582	0.247813	-2.01267	0.00398364	-2.39972	2.39972
KAG1365790	A0A8B7BHV3	AT5G59420	#N/A	putative Oxysterol-binding protein-related protein 3C	45	41.5	44	43.5	15.3	26	9.7	17	6.7	4.9		5.8	1.47196	6.76215	0.9	3.38382	39.7774	15.5172	0.390805	-1.35548	0.0426889	-1.36968	1.36968	0.133333	-2.90689	0.0144468	-1.84023	1.84023	0.341176	-1.55141	0.253611	-0.595831	0.595831
KAG1364107	A0A8B7CJD5	AT4G29040	EGU2254G0015-MONOMER	26S proteasome regulatory subunit 4	42.2	36.3	43.8	40.7667	48.7	54.4	43.4	48.8333	18	15.6	15.7	16.4333	3.22525	4.49172	1.10855	7.91148	9.19806	6.74576	1.19787	0.260476	0.273656	-0.562794	0.562794	0.403107	-1.31076	0.00762626	-2.11769	2.11769	0.336519	-1.57124	0.0103075	-1.98685	1.98685
KAG1346405	A0A8B7CEX7	AT1G51710	#N/A	putative Ubiquitin carboxyl-terminal hydrolase 6	65.9	46.3	43.6	51.9333	22.1	31.1	19.4	24.2	33.9	34.6	44.9	37.8	9.93725	5.002	5.02858	19.1346	20.6694	13.3031	0.465982	-1.10165	0.0815098	-1.08879	1.08879	0.727856	-0.458275	0.282051	-0.549673	0.549673	1.56198	0.643379	0.168078	-0.77449	0.77449
KAG1339141	#N/A	#N/A	#N/A	DDB1- and CUL4-associated factor 8	39.1	38.9	43.3	40.4333	23.5	29.2	7.8	20.1667	6.7		4.6	5.65	2.02868	9.04888	1.05	5.01735	44.8705	18.5841	0.498763	-1.00357	0.121796	-0.914366	0.914366	0.139736	-2.83922	0.0562624	-1.24978	1.24978	0.280165	-1.83565	0.380174	-0.420017	0.420017
KAG1335211	A0A8B7BRR1	#N/A	#N/A	embryonic protein DC-8	48.7	48.2	42.8	46.5667	56.9	49.6	76.7	61.0667	115.3	129.5	117.9	120.9	2.67125	11.4491	6.17306	5.73639	18.7485	5.10592	1.31138	0.391087	0.280498	-0.55207	0.55207	2.59628	1.37644	0.0032695	-2.48552	2.48552	1.9798	0.985357	0.0332686	-1.47797	1.47797
KAG1326805	A0A8B7BFK2	AT1G76550	MONOMER8I-2735	pyrophosphate--fructose 6-phosphate 1-phosphotransferase subunit alpha	67.9	50.4	41.3	53.2	28.6	35.2	21.7	28.5	14.4	21.6	11	15.6667	11.0384	5.51181	4.41915	20.7489	19.3397	28.2073	0.535714	-0.900464	0.0794193	-1.10007	1.10007	0.294486	-1.76373	0.0425025	-1.37159	1.37159	0.549708	-0.863264	0.00701604	-2.15391	2.15391
KAG1339074	A0A8B7C6P9	AT2G40170	#N/A	em protein H5	44.4	38.1	40.6	41.0333	12	30.9	63.8	35.5667	508.4	475.9	526.2	503.5	2.59015	21.4032	20.8251	6.31231	60.1776	4.13608	0.866775	-0.206271	0.76618	-0.115669	0.115669	12.2705	3.61712	0.000891807	-3.04973	3.04973	14.1565	3.82339	0.00103883	-2.98346	2.98346
KAG1342664	A0A8B7CF57	AT2G44310	#N/A	Recoverin family protein	33.4	69.8	40.2	47.8	44.5	31.4	48.6	41.5	94.7	121.2	97.1	104.333	15.8021	7.3353	11.9667	33.0588	17.6754	11.4697	0.868201	-0.203899	0.732847	-0.134987	0.134987	2.18271	1.12612	0.00255621	-2.5924	2.5924	2.51406	1.33002	0.0431471	-1.36505	1.36505
KAG1338328	A0A8B7BZD2	AT1G23100	#N/A	10 kDa chaperonin	41	44.4	39.7	41.7	49.8	58.1	32	46.6333	21.4	17.8	7	15.4	1.98158	10.888	6.11882	4.75199	23.3481	39.7326	1.11831	0.161314	0.525597	-0.279347	0.279347	0.369305	-1.43712	0.0200859	-1.69711	1.69711	0.330236	-1.59843	0.0213505	-1.67059	1.67059
KAG1355334	A0A8B7D2J7	AT4G27670	#N/A	putative Small heat shock protein, chloroplastic	34.6	41.2	39.2	38.3333	38.7	36.3	37.2	37.4	77.2	82.7	102.2	87.3667	2.76325	0.989949	10.7264	7.20848	2.64692	12.2774	0.975652	-0.0355612	0.758531	-0.120027	0.120027	2.27913	1.18848	0.019726	-1.70496	1.70496	2.33601	1.22404	0.0238334	-1.62281	1.62281
KAG1326426	A0A8B7CPM4	#N/A	EGU1685G2120-MONOMER	ribulose bisphosphate carboxylase small chain	36.4	47	36.5	39.9667	23.5	26.6		25.05	12.5	9.5	8.1	10.0333	4.97349	1.55	1.83545	12.4441	6.18762	18.2936	0.626772	-0.673987	0.14103	-0.85069	0.85069	0.251043	-1.994	0.0173937	-1.75961	1.75961	0.400532	-1.32001	0.136087	-0.866183	0.866183
KAG1364214	A0A8B7BPL8	#N/A	#N/A	11 kDa late embryogenesis abundant protein	57.4	32.5	36.4	42.1	80.9	70.3	112	87.7333	80.4	65.5	50	65.3	10.9353	17.6964	12.4116	25.9745	20.1707	19.007	2.08393	1.0593	0.0990564	-1.00412	1.00412	1.55107	0.633263	0.0536418	-1.2705	1.2705	0.744301	-0.426042	0.375186	-0.425754	0.425754
KAG1369861	A0A8B7BME1	AT1G10940	#N/A	serine/threonine-protein kinase SAPK7	37.6	33.6	35.4	35.5333	87.8	37.1	28.8	51.2333	12.9	14.5	13	13.4667	1.63571	26.0776	0.731817	4.60332	50.8997	5.43428	1.44184	0.52791	0.464203	-0.333292	0.333292	0.378987	-1.39978	0.00538019	-2.2692	2.2692	0.26285	-1.92769	0.180431	-0.743689	0.743689
KAG1346258	A0A8B7BIF8	AT3G15980	#N/A	coatomer subunit beta'-1	30.4	32.2	35.1	32.5667	19.1	13.6	12.6	15.1	30.4	21	26.4	25.9333	1.9362	2.85774	3.8517	5.94536	18.9254	14.8523	0.463664	-1.10885	0.0335491	-1.47432	1.47432	0.796315	-0.328588	0.189871	-0.721541	0.721541	1.71744	0.780259	0.0282996	-1.54822	1.54822
KAG1342149	A0A8B8ZNA6	AT3G04840	#N/A	40S ribosomal protein S3a	24.7	27.8	33.9	28.8	33.2	22.6	31.7	29.1667	15	8.6	4.2	9.26667	3.82187	4.68354	4.43421	13.2704	16.0579	47.8512	1.01273	0.0182517	0.937764	-0.0279066	0.0279066	0.321759	-1.63595	0.0774181	-1.11116	1.11116	0.317714	-1.6542	0.0379061	-1.42129	1.42129
KAG1359637	A0A8B7BKB5	AT5G23950	EGU1474G0201-MONOMER	protein SRC2	23.1	33.9	33.7	30.2333	31.9	30.7	25.9	29.5	50.8	56.6	49.5	52.3	5.04469	2.5923	3.08653	16.6859	8.78745	5.90159	0.975744	-0.0354251	0.895776	-0.0478008	0.0478008	1.72988	0.790671	0.0235797	-1.62746	1.62746	1.77288	0.826096	0.00806416	-2.09344	2.09344
KAG1365739	A0A8B7BGS4	AT5G59840	#N/A	ras-related protein RABE1c	29.9	30.6	32.9	31.1333	27.5	35.7	19.7	27.6333	48.3	31.2	35.4	38.3	1.28149	6.53265	7.27599	4.11614	23.6405	18.9974	0.88758	-0.17205	0.577638	-0.238344	0.238344	1.23019	0.298884	0.331869	-0.479033	0.479033	1.38601	0.470935	0.301393	-0.520866	0.520866
ABM530281	A0A8B7CBA0	AT5G56600	#N/A	profilin	26.7	32.6	32.7	30.6667	23.9	38.2	12.9	25	35.8	31.5	34.5	33.9333	2.80515	10.3579	1.80062	9.14724	41.4317	5.30634	0.815217	-0.294743	0.527362	-0.277891	0.277891	1.10652	0.146032	0.3943	-0.404174	0.404174	1.35733	0.440775	0.394523	-0.403928	0.403928
KAG1371174	A0A8B7CC81	AT2G41530	EGU2028G0200-MONOMER	S-formylglutathione hydrolase	30.6	30.7	32.5	31.2667	33.2	30.9	20.4	28.1667	19	8	14.6	13.8667	0.873053	5.57155	4.52057	2.79228	19.7807	32.6003	0.900853	-0.150637	0.566211	-0.247022	0.247022	0.443497	-1.173	0.0324669	-1.48856	1.48856	0.492308	-1.02237	0.101375	-0.994069	0.994069
AZZ091721	A0A8B7CMB8	AT4G13050	MONOMER8I-652	class A acyl-ACP thioesterase	20.2	26.7	32.4	26.4333	59	55.1	37.9	50.6667	8.2	2.1	9.3	6.53333	4.9842	9.16673	3.16684	18.8557	18.0922	48.4721	1.91677	0.938679	0.132724	-0.877049	0.877049	0.247163	-2.01647	0.0376361	-1.42439	1.42439	0.128947	-2.95515	0.0297906	-1.52592	1.52592
KAG1342465	A0A8B7BSH8	AT5G39850	#N/A	XXXX	30.2	34.8	30.8	31.9333	13.2	14.6	12.9	13.5667	5.3	6.4	6.6	6.1	2.04179	0.74087	0.571548	6.3939	5.46096	9.36963	0.424843	-1.235	0.00268022	-2.57183	2.57183	0.191023	-2.38818	0.00251948	-2.59869	2.59869	0.449631	-1.15319	0.00618027	-2.20899	2.20899
KAG1342695	A0A8B9A5T7	AT1G48430	MONOMER8I-21	hypothetical protein COCNU_05G009240	20.6	17.1	29.7	22.4667	5.7	13.4	14.9	11.3333	40	44.7	40.9	41.8667	5.31058	4.03016	2.03688	23.6376	35.5603	4.86516	0.504451	-0.987214	0.0957172	-1.01901	1.01901	1.8635	0.898016	0.0547114	-1.26192	1.26192	3.69412	1.88523	0.00625623	-2.20369	2.20369
KAG1358603	A0A8B9ASA4	AT5G50370	MONOMER8I-575	adenylate kinase 4	26.5	32.8	29.6	29.6333	12.8	15.1	11.7	13.2	9.6	9.9	8.1	9.2	2.57207	1.41657	0.787401	8.67966	10.7316	8.5587	0.445444	-1.16668	0.00685746	-2.16384	2.16384	0.310461	-1.68752	0.00777491	-2.1093	2.1093	0.69697	-0.520832	0.0225472	-1.64691	1.64691
KAG1334341	A0A8B7C6L0	AT1G54100	EGU0935G0095-MONOMER	aldehyde dehydrogenase family 7 member A1	22.2	25.9	29.4	25.8333	47.3	43	54.1	48.1333	8.5	7.8	5.7	7.33333	2.93977	4.56971	1.18977	11.3797	9.49385	16.2242	1.86323	0.897803	0.0133484	-1.87457	1.87457	0.283871	-1.81669	0.0236028	-1.62704	1.62704	0.152355	-2.7145	0.00919494	-2.03645	2.03645
KAG1334538	A0A8B7CPU7	AT2G22240	MONOMER8I-1820	Inositol-3-phosphate synthase	29.8	29.2	28.7	29.2333	44.7	36.3	34	38.3333	20.1	11.8	11.6	14.5	0.449691	4.59879	3.96064	1.53828	11.9968	27.3148	1.31129	0.390985	0.0907725	-1.04205	1.04205	0.496009	-1.01156	0.0279914	-1.55298	1.55298	0.378261	-1.40255	0.000904439	-3.04362	3.04362
KAG1346966	A0A8B7BXX5	AT5G17380	EGU2441G1095-MONOMER	2-hydroxyacyl-CoA lyase	24.9	27	28.6	26.8333	86.6	56.5	147	96.7	10.3	11.5	10.6	10.8	1.51511	37.6304	0.509902	5.64637	38.9146	4.72131	3.60373	1.84949	0.114966	-0.939429	0.939429	0.402484	-1.31299	0.00399989	-2.39795	2.39795	0.111686	-3.16248	0.0851974	-1.06957	1.06957
KAG1348254	A0A8B7CDB9	#N/A	#N/A	late embryogenesis abundant protein 31-like	24.4	25.2	27.9	25.8333	18.5	16.9	16.8	17.4	12.5	12.4	20.7	15.2	1.49741	0.778888	3.8893	5.79641	4.47637	25.5875	0.673548	-0.570147	0.0303096	-1.51842	1.51842	0.588387	-0.765162	0.0256396	-1.59109	1.59109	0.873563	-0.195016	0.549233	-0.260243	0.260243
KAG1354513	A0A8B8ZV19	AT4G36195	#N/A	putative serine protease EDA2	28.7	25	27.3	27	47.9	45.3	44.3	45.8333	52.9	65.1	61.6	59.8667	1.52534	1.51731	5.12922	5.64941	3.31049	8.56774	1.69753	0.763438	0.00264279	-2.57794	2.57794	2.21728	1.14879	0.019399	-1.71222	1.71222	1.30618	0.385356	0.0918347	-1.03699	1.03699
KAG1364388	A0A8B7C9E2	AT1G16030	#N/A	heat shock 70 kDa protein	25.8	20.5	26.9	24.4	51.7	50	40.8	47.5	121.4	123.2	117.3	120.633	2.79404	4.78818	2.46892	11.451	10.0804	2.04663	1.94672	0.961046	0.0392415	-1.40625	1.40625	4.94399	2.30568	0.00136939	-2.86347	2.86347	2.53965	1.34463	0.000719883	-3.14274	3.14274
KAG1326542	A0A8B7C9E2	AT1G16030	#N/A	heat shock 70 kDa protein	30.1	26.7	25.1	27.3	54.6	43.3	65.4	54.4333	12.2	20.2	14.9	15.7667	2.08487	9.02306	3.32298	7.63687	16.5763	21.076	1.99389	0.995589	0.060055	-1.22145	1.22145	0.577534	-0.792023	0.0753091	-1.12315	1.12315	0.289651	-1.78761	0.0414487	-1.38249	1.38249
KAG1331211	A0A8B8J7B6	AT1G77120	MONOMER8I-2100	alcohol dehydrogenase 3	39.3	37.9	25	34.0667	56.5	37	53.4	48.9667	16	17.9	20.6	18.1667	6.43653	8.55583	1.88739	18.8939	17.4728	10.3893	1.43738	0.523439	0.223006	-0.651684	0.651684	0.533268	-0.907067	0.112203	-0.949996	0.949996	0.371001	-1.43051	0.0388912	-1.41015	1.41015
KAG1342196	A0A8B7CM45	#N/A	#N/A	oleosin 18 kDa	20.6	23.9	23.7	22.7333	90.3	45.8	163.1	99.7333	41.8	44.8	41.6	42.7333	1.5107	48.3499	1.46363	6.64532	48.4791	3.42504	4.3871	2.13327	0.152601	-0.816442	0.816442	1.87977	0.910553	0.0027635	-2.55854	2.55854	0.428476	-1.22271	0.245358	-0.610199	0.610199
AGS434741	#N/A	ATCG00490	EGU1868G0105-MONOMER	ribulose bisphosphate carboxylase large chain	8.4	28.2	23.3	19.9667	41	21.3	27.2	29.8333	17.3	10.6	1.9	9.93333	8.41995	8.25523	6.30467	42.17	27.6712	63.4699	1.49416	0.579332	0.490619	-0.309256	0.309256	0.497496	-1.00724	0.402852	-0.394855	0.394855	0.332961	-1.58658	0.0499615	-1.30136	1.30136
KAG1362164	A0A8B8ZQF3	AT3G20050	#N/A	hypothetical protein COCNU_10G003830	23.5	19.4	23.3	22.0667	11.4	12	18.1	13.8333	10.4	8.7	7.3	8.8	1.88739	3.02692	1.26754	8.5531	21.8813	14.4039	0.626888	-0.67372	0.0560065	-1.25176	1.25176	0.398792	-1.32629	0.0130782	-1.88345	1.88345	0.636145	-0.652573	0.231022	-0.636347	0.636347
KAG1327899	A0A8B7CA35	AT3G22110	#N/A	Proteasome subunit alpha type-4	23.5	25.6	23.1	24.0667	19.7	24.7	9.1	17.8333	13.9	15.6	16.6	15.3667	1.09646	6.50402	1.11455	4.55592	36.4711	7.25304	0.740997	-0.43246	0.257182	-0.58976	0.58976	0.638504	-0.647232	0.0157808	-1.80187	1.80187	0.861682	-0.214772	0.674894	-0.170764	0.170764
KAG1346394	A0A8B7CFK6	AT5G56730	#N/A	Zinc protease PQQL-like	12.8	19	23.1	18.3	41.4	30.5	18.5	30.1333	5.6	4.3		4.95	4.23399	9.35248	0.65	23.1366	31.037	13.1313	1.64663	0.719517	0.342379	-0.465492	0.465492	0.270492	-1.88634	0.210051	-0.677676	0.677676	0.16427	-2.60586	0.0977968	-1.00968	1.00968
KAG1359095	A0A8B7BZI6	AT3G02360	MONOMER8I-3025	6-phosphogluconate dehydrogenase, decarboxylating 1	23.4	28.2	22.8	24.8	29.6	31.1	18.1	26.2667	15.3	14.4	8.4	12.7	2.41661	5.80708	3.06268	9.74439	22.1082	24.1156	1.05914	0.082893	0.694046	-0.158612	0.158612	0.512097	-0.965512	0.0264387	-1.57776	1.57776	0.483503	-1.0484	0.0221571	-1.65449	1.65449
KAG1365496	A0A8B7BWM5	AT1G14980	#N/A	10 kDa chaperonin, mitochondria	16.9	22.7	22.2	20.6	25.6	27	26.5	26.3667	16.8	19.6	17.9	18.1	2.62425	0.579272	1.15181	12.7391	2.19698	6.36359	1.27994	0.356071	0.059018	-1.22902	1.22902	0.878641	-0.186655	0.183286	-0.736872	0.736872	0.686473	-0.542725	0.00278489	-2.55519	2.55519
KAG1366587	A0A8B7D112	AT4G24620	EGU2755G0224-MONOMER	putative Glucose-6-phosphate isomerase 1, chloroplastic	24	16.9	21.5	20.8	71.6	34.3	116.9	74.2667	17.1	14.2	9.4	13.5667	2.94052	33.774	3.17525	14.1371	45.4766	23.4048	3.57051	1.83613	0.142737	-0.845465	0.845465	0.652244	-0.616517	0.116988	-0.931857	0.931857	0.182675	-2.45265	0.139577	-0.855186	0.855186
KAG1366376	#N/A	#N/A	#N/A	putative Proteasome subunit alpha type-6	20	21.9	21	20.9667	19.1	15.4		17.25	6.7	11.5	9.4	9.2	0.77603	1.85	1.96469	3.70125	10.7246	21.3553	0.822734	-0.281501	0.41241	-0.384671	0.384671	0.438792	-1.18839	0.00507312	-2.29472	2.29472	0.533333	-0.906891	0.306009	-0.514266	0.514266
KAG1347934	A0A8B7C665	#N/A	#N/A	serpin-ZXA	19.5	18.9	20.3	19.5667	19.8	14.4	14.9	16.3667	20.4	23.6	21.9	21.9667	0.573488	2.4363	1.30724	2.93095	14.8857	5.95104	0.836457	-0.257637	0.212214	-0.673225	0.673225	1.12266	0.166918	0.17616	-0.754092	0.754092	1.34216	0.424555	0.162092	-0.790238	0.790238
KAG1346424	A0A8B7BI29	AT5G53480	#N/A	importin subunit beta-1	22.8	16.6	20.2	19.8667	30.7	19.2	20.7	23.5333	6.8	7.2	7.9	7.3	2.54209	5.10446	0.454606	12.7958	21.6904	6.22748	1.18456	0.244356	0.237763	-0.623855	0.623855	0.36745	-1.44438	0.022328	-1.65115	1.65115	0.310198	-1.68874	0.0516655	-1.2868	1.2868
KAG1353917	A0A8B7C4D8	AT5G60640	#N/A	Protein disulfide-isomerase	20.7	23.6	19.7	21.3333	65.6	49	73.8	62.8	4.7	2.1		3.4	1.65395	10.3163	1.3	7.7529	16.4273	38.2353	2.94375	1.55766	0.0392015	-1.4067	1.4067	0.159375	-2.6495	0.0927099	-1.03287	1.03287	0.0541401	-4.20716	0.0822177	-1.08503	1.08503
KAG1371238	A0A8B7C1W8	#N/A	MONOMER8I-1624	glutathione S-transferase 3	15.6	21.9	19.5	19	58.2	52.6	23	44.6	8.9	13.5	9.6	10.6667	2.59615	15.4437	2.02375	13.664	34.627	18.9726	2.34737	1.23104	0.157442	-0.80288	0.80288	0.561404	-0.83289	0.0120815	-1.91788	1.91788	0.239163	-2.06393	0.0864196	-1.06339	1.06339
KAG1338955	A0A8B7BPL4	#N/A	#N/A	Vicilin-like seed storage protein	13.6	22.5	19.1	18.4	13.4	14.3	4.9	10.8667	45.4	52.7	49.4	49.1667	3.66697	4.23504	2.98478	19.9292	38.9728	6.07073	0.59058	-0.759796	0.204324	-0.689681	0.689681	2.6721	1.41797	0.000282767	-3.54857	3.54857	4.52454	2.17777	0.00876168	-2.05741	2.05741
KAG1364380	A0A8B7C9D8	AT2G24200	#N/A	Leucine aminopeptidase 2, chloroplastic	16	18.3	18.5	17.6	11.1	15.1	13.3	13.1667	24.7	15.5	27.5	22.5667	1.13431	1.63571	5.12597	6.44496	12.4231	22.7148	0.748106	-0.418685	0.0191644	-1.7175	1.7175	1.2822	0.358618	0.329339	-0.482357	0.482357	1.71392	0.777303	0.172119	-0.76417	0.76417
KAG1346573	A0A8B7D379	#N/A	#N/A	early nodulin-like protein 1	21.4	22.6	17.7	20.5667	11.1	23	8.7	14.2667	99.4	99.5	96.7	98.5333	2.0854	6.25264	1.29701	10.1397	43.8269	1.31631	0.693679	-0.52766	0.202574	-0.693416	0.693416	4.79092	2.2603	6.04962e-05	-4.21827	4.21827	6.90654	2.78796	0.00211803	-2.67407	2.67407
KAG1353972	A0A8B7BTR9	AT2G20420	EGU0206G0928-MONOMER	Succinate--CoA ligase [ADP-forming] subunit beta, mitochondrial	27.9	21.8	17.6	22.4333	25.4	26.5	25.9	25.9333	15.4	18.2	15.8	16.4667	4.22874	0.449691	1.23648	18.8502	1.73403	7.509	1.15602	0.209164	0.385208	-0.414305	0.414305	0.734027	-0.446095	0.213025	-0.671569	0.671569	0.634961	-0.655259	0.00378469	-2.42197	2.42197
KAG1346418	A0A8B7CTR7	AT4G33070	EGU2621G1057-MONOMER	pyruvate decarboxylase 1	22.8	21.6	16.6	20.3333	2.1	9.9		6	6.9	11.3	13.4	10.5333	2.68494	3.9	2.70842	13.2046	65	25.7129	0.295082	-1.76081	0.17249	-0.763236	0.763236	0.518033	-0.948885	0.116531	-0.933557	0.933557	1.75556	0.811928	0.319331	-0.495759	0.495759
KAG1326696	A0A8B8JCQ9	AT5G47720	MONOMER8I-2444	acetyl-CoA acetyltransferase, cytosolic 1	17.9	18.3	15.5	17.2333	31.3	34.7	39.2	35.0667	5.4	12.6		9	1.23648	3.23557	3.6	7.17495	9.2269	40	2.03482	1.0249	0.0281767	-1.55011	1.55011	0.522244	-0.937205	0.227633	-0.642764	0.642764	0.256654	-1.9621	0.0502942	-1.29848	1.29848
KAG1331303	A0A8B7C4R7	AT5G19150	EGU1685G1458-MONOMER	ATP-dependent (S)-NAD(P)H-hydrate dehydratase	16.8	20	15.3	17.3667	28.4	28.4	12.6	23.1333	25.1	24.3	30.9	26.7667	1.96016	7.44819	2.9409	11.2869	32.1968	10.9872	1.33205	0.413652	0.314673	-0.502141	0.502141	1.54127	0.624117	0.104748	-0.979853	0.979853	1.15706	0.210464	0.66951	-0.174243	0.174243
KAG1361301	A0A8B7CVA4	AT3G48990	EGU0709G0903-MONOMER	oxalate--CoA ligase	19	18.4	15.3	17.5667	14.7	17.3		16	21.5	22.3	30.9	24.9	1.62138	1.3	4.25519	9.22989	8.125	17.0891	0.910816	-0.134769	0.340563	-0.467803	0.467803	1.41746	0.503305	0.219475	-0.658614	0.658614	1.55625	0.638074	0.0963686	-1.01606	1.01606
KAG1346722	A0A8B9ABX0	AT5G11520	EGU2441G2399-MONOMER	putative Aspartate aminotransferase 3, chloroplastic	19.2	14.8	12.7	15.5667	2.7	20		11.35	25.4	22.7	18.7	22.2667	2.70842	8.65	2.75237	17.3989	76.2115	12.361	0.729122	-0.455768	0.694359	-0.158416	0.158416	1.43041	0.516426	0.0079969	-2.09708	2.09708	1.96182	0.972193	0.424633	-0.371986	0.371986
KAG1369923	A0A8B8J108	#N/A	#N/A	protein FAR1-RELATED SEQUENCE 5	18	16.3	12.6	15.6333	20	24.2	11	18.4	8.5	2	6.4	5.63333	2.25438	5.50636	2.70842	14.4203	29.9259	48.0785	1.17697	0.23508	0.422985	-0.373675	0.373675	0.360341	-1.47256	0.0510984	-1.29159	1.29159	0.306159	-1.70765	0.130163	-0.885512	0.885512
KAG1338567	A0A8B8ZFI4	#N/A	EGU2789G0001-MONOMER	glucan endo-1,3-beta-glucosidase	9.6	9.4	9.3	9.43333	8.6	9	15.2	10.9333	74.8	81.1	67	74.3	0.124722	3.02141	5.76715	1.32214	27.6348	7.76198	1.15901	0.212894	0.566807	-0.246565	0.246565	7.87633	2.97752	0.00386585	-2.41275	2.41275	6.79573	2.76463	0.00893115	-2.04909	2.04909

## Sheet: MPT
Accession	Datepalm	TAIR	Elaeis guineensis PMN	Protein name	Immature			Average Imm	Intermediate			Average Int	Mature			Average Mat	SD Imm	SD Int	SD Mat	CV% Imm	CV% Int	CV% Mat	Log FC Int/Imm	Log 2 FC Int/imm	T.TEST	Log (10) T.TEST	P-value	Log FC Mat/Imm	Log 2 FC Mat/Imm	T.TEST	Log (10) T.TEST	P-value	Log FC Mat/Int	Log 2 FC Mat/Int	T.TEST	Log (10) T.TEST	P-value
KAG1347739	A0A8B7BEE0	#N/A	#N/A	vicilin-like antimicrobial peptides 2-2	81937.2	81869.4	81825.9	81877.5	137169	135243	138136	136849	137594	133500	136350	135815	12336.6	1202.7	1713.77	15.0672	0.878851	1.26185	1.67139	0.74105	0.000243373	-3.61373	3.61373	1.65875	0.730099	0.000493615	-3.30661	3.30661	0.992438	-0.0109509	0.292017	-0.534592	0.534592
AYJ721721	A0A8B7CKA4	AT1G13440	MONOMER8I-1897	glyceraldehyde-3-phosphate dehydrogenase	56740.4	57535.2	57351.4	57209	61399.3	58451.4	59655.4	59835.4	62327	64437.3	62998.4	63254.2	12731.3	1210.18	880.314	22.2539	2.02252	1.39171	1.04591	0.0647563	0.138057	-0.859941	0.859941	1.10567	0.14492	0.0049934	-2.3016	2.3016	1.05714	0.0801636	0.144099	-0.841338	0.841338
KAG1362604	A0A8B7BJP3	AT2G36530	MONOMER8I-2601	Enolase 2	32556.6	30721	32046	31774.5	8214.3	11294.8	9437.1	9648.73	7316.3	7238.5	7047.2	7200.67	717.979	1266.48	113.07	2.2596	13.1259	1.57027	0.303662	-1.71946	0.00420647	-2.37608	2.37608	0.226618	-2.14167	0.000500771	-3.30036	3.30036	0.746281	-0.422209	0.115316	-0.938111	0.938111
KAG1363372	A0A8B7CE63	AT2G36460	MONOMER8I-2617	fructose-bisphosphate aldolase 1, cytoplasmic	31066.1	30700	30841.4	30869.2	18631.2	18215.4	16998.8	17948.5	15240	15388.8	15234.8	15287.9	1577.96	692.639	71.4022	5.11176	3.85904	0.467051	0.581437	-0.782306	0.00127153	-2.89567	2.89567	0.495247	-1.01378	9.16498e-05	-4.03787	4.03787	0.851764	-0.231473	0.0306723	-1.51325	1.51325
KAG1368674	A0A8B9A5W3	#N/A	#N/A	putative Vicilin-like antimicrobial peptides 2-1	27541.9	27702.4	27943	27729.1	52622.1	48303	50258.5	50394.5	41858.8	44044.6	43031.9	42978.4	1631.18	1765.89	893.15	5.88255	3.50412	2.07813	1.81739	0.861866	0.00329834	-2.4817	2.4817	1.54994	0.632212	0.00149424	-2.82558	2.82558	0.852839	-0.229654	0.0586764	-1.23154	1.23154
KAG1365105	A0A8B7CFN0	AT1G79550	MONOMER8I-2984	phosphoglycerate kinase 3, cytosolic	24284.5	24755.5	24421.4	24487.1	18136.3	18033.2	17821.7	17997.1	21424.6	21931.6	21597.3	21651.2	5557.3	130.952	210.457	22.6948	0.727628	0.972037	0.73496	-0.444262	0.000722627	-3.14109	3.14109	0.884185	-0.177579	1.7805e-05	-4.74946	4.74946	1.20304	0.266683	0.00258936	-2.58681	2.58681
KAG1360659	A0A8B7D3M2	AT5G51970	MONOMER8I-2044	sorbitol dehydrogenase	13323.8	13515.1	13291.9	13376.9	4160.1	5915.8	5318.2	5131.37	4738.8	4832.6	4683.7	4751.7	1621.62	728.835	61.4687	12.1225	14.2035	1.29362	0.383598	-1.38233	0.00325548	-2.48739	2.48739	0.355216	-1.49323	1.16232e-05	-4.93467	4.93467	0.926011	-0.110899	0.524276	-0.28044	0.28044
KAG1369965	A0A8B7C2C7	AT1G21750	#N/A	protein disulfide-isomerase	10132.5	10179.8	10098.8	10137	5506.7	5318.8	4906.4	5243.97	3294.1	3299.7	3113.7	3235.83	1165.59	250.719	86.3916	11.4983	4.78109	2.66984	0.517308	-0.950905	0.00112623	-2.94837	2.94837	0.319209	-1.64743	3.99902e-05	-4.39805	4.39805	0.617058	-0.696521	0.00363114	-2.43996	2.43996
KAG1366505	A0A8B7C9H8	AT1G35720	MONOMER8I-2544	annexin D1	7822.5	7844.5	7753.9	7806.97	5333	5142.5	4943.8	5139.77	4174.2	4313	4276.6	4254.6	508.425	158.902	58.7614	6.51246	3.09162	1.38113	0.658356	-0.603059	0.00124426	-2.90509	2.90509	0.544975	-0.875739	0.000201662	-3.69538	3.69538	0.827781	-0.272679	0.025669	-1.59059	1.59059
KAG1327655	A0A8B8ZT31	#N/A	#N/A	embryonic protein DC-8	6682.6	6805.2	6913.3	6800.37	16552.9	17337.7	18447.9	17446.2	16750.7	16227.1	16393.4	16457.1	84.1288	777.423	218.448	1.23712	4.45613	1.32738	2.56547	1.35923	0.00205863	-2.68642	2.68642	2.42003	1.27502	0.000456458	-3.3406	3.3406	0.943306	-0.0842029	0.269071	-0.570133	0.570133
KAG1330568	A0A8B9APY9	AT1G70730	EGU1136G0588-MONOMER	Phosphoglucomutase, cytoplasmic 2	6775.9	6743.6	6657.7	6725.73	4081.1	4243.6	4117.8	4147.5	4309.2	4632.6	4598	4513.27	1168.84	69.5851	144.987	17.3786	1.67776	3.21245	0.616661	-0.69745	0.000530563	-3.27526	3.27526	0.671045	-0.57552	0.00332915	-2.47767	2.47767	1.08819	0.12193	0.0382801	-1.41703	1.41703
KAG1326198	A0A8B9A143	AT4G16155	EGU1685G0072-MONOMER	putative Dihydrolipoyl dehydrogenase 2, chloroplastic	4382.6	4377.5	4407.5	4389.2	1318.4	1794.5	1497.2	1536.7	622.4	607.5	588.1	606	72.1849	196.364	14.043	1.6446	12.7783	2.31733	0.350109	-1.51412	0.00246498	-2.60819	2.60819	0.138066	-2.85657	2.3448e-05	-4.62989	4.62989	0.394352	-1.34245	0.0225421	-1.647	1.647
AIL287561	A0A8B7CJR8	AT5G08370	MONOMER8I-2881	alpha galactosidase isoform 2	4201.9	4283.6	4285.8	4257.1	5830.2	5643.7	5930.5	5801.47	9133.2	9447.5	9442.4	9341.03	86.9488	118.835	146.975	2.04244	2.04837	1.57344	1.36277	0.446547	0.00354945	-2.44984	2.44984	2.19422	1.13371	0.000225436	-3.64698	3.64698	1.61012	0.687164	0.00167923	-2.77489	2.77489
KAG1359409	A0A8B7CHJ2	AT2G16600	#N/A	peptidyl-prolyl cis-trans isomerase CYP19-1	4037.6	4208.8	4129.1	4125.17	4510.6	4853.1	4871.1	4744.93	5976.3	5827.7	5891.3	5898.43	68.7951	165.862	60.875	1.66769	3.49555	1.03205	1.15024	0.201935	0.0157123	-1.80376	1.80376	1.42987	0.515879	0.00270905	-2.56718	2.56718	1.2431	0.313944	0.0179486	-1.74597	1.74597
KAG1338083	A0A8B7CIS3	#N/A	MONOMER8I-1567	Aldose reductase	4000.7	4126.8	4062	4063.17	5357.6	5039.2	5287.7	5228.17	6024.3	5985.5	5987	5998.93	316.564	136.633	17.9474	7.79106	2.6134	0.299176	1.28672	0.363701	0.0125691	-1.9007	1.9007	1.47642	0.562101	0.000611891	-3.21333	3.21333	1.14743	0.198401	0.0128628	-1.89066	1.89066
KAG1365376	A0A8B7BH10	AT1G11840	EGU2441G0280-MONOMER	putative Lactoylglutathione lyase	3401.4	3507.3	3405.5	3438.07	5226.8	5115.4	5303.8	5215.33	5230.1	5240.9	5321.8	5264.27	70.9629	77.3402	40.9204	2.06403	1.48294	0.777325	1.51694	0.601162	0.00239654	-2.62041	2.62041	1.53117	0.614635	0.000833489	-3.0791	3.0791	1.00938	0.0134731	0.331728	-0.479217	0.479217
KAG1359637	A0A8B7BKB5	AT5G23950	EGU1474G0201-MONOMER	protein SRC2	3294.5	3387.5	3305.1	3329.03	3875.4	3818.3	3853.9	3849.2	3870.5	3816.9	3865.4	3850.93	34.2358	23.5467	24.1551	1.0284	0.611729	0.627253	1.15625	0.209455	0.00760877	-2.11869	2.11869	1.15677	0.210105	0.00783559	-2.10593	2.10593	1.00045	0.000649514	0.761322	-0.118432	0.118432
KAG1331212	A0A8B7CAM1	AT1G77120	MONOMER8I-2100	alcohol dehydrogenase 1	3287.3	3301.4	3296	3294.9	601.7	1025.6	821.3	816.2	1462.3	1430.3	1454.8	1449.13	88.2914	173.094	13.6646	2.67964	21.2073	0.942952	0.247716	-2.01324	0.00227069	-2.64384	2.64384	0.439811	-1.18504	5.35097e-05	-4.27157	4.27157	1.77546	0.828196	0.0406197	-1.39126	1.39126
KAG1365594	A0A8B7BYK8	AT1G09780	EGU2621G1831-MONOMER	2,3-bisphosphoglycerate-independent phosphoglycerate mutase	3387.5	3101.2	3218.6	3235.77	1265	1413.4	1170.7	1283.03	834	836.5	825.4	831.967	86.1198	99.899	4.75418	2.6615	7.78616	0.571439	0.396516	-1.33455	0.00469021	-2.32881	2.32881	0.257116	-1.95951	0.00120554	-2.91882	2.91882	0.648437	-0.624961	0.0217343	-1.66285	1.66285
A0A222NNM91	#N/A	#N/A	#N/A	cocosin 1	3179.6	3238.6	3201.1	3206.43	3317.1	3379.4	3377	3357.83	4342.3	4296.8	4378.3	4339.13	108.816	28.8195	33.3475	3.39369	0.858276	0.768529	1.04722	0.0665612	0.0065219	-2.18563	2.18563	1.35326	0.436438	0.00109335	-2.96124	2.96124	1.29224	0.369876	0.00110767	-2.95559	2.95559
KAG1339294	A0A8B7BSP7	AT3G55440	MONOMER8I-1556	Triosephosphate isomerase, cytosolic	2956.9	3082.2	2978.7	3005.93	2979.2	2702.1	2730.9	2804.07	2349	2532.2	2428.8	2436.67	83.797	124.395	74.9977	2.78772	4.43623	3.07788	0.932844	-0.100292	0.23035	-0.637612	0.637612	0.810619	-0.302904	0.00114944	-2.93952	2.93952	0.868976	-0.202612	0.115219	-0.938477	0.938477
KAG1366377	A0A8B9AUX0	AT3G43190	MONOMER8I-354	sucrose synthase 1	2885.8	2827.8	2870.4	2861.33	386.8	527.8	244.9	386.5	125.8	128.2	136	130	22.2781	115.494	4.35431	0.778592	29.8819	3.34947	0.135077	-2.88815	0.00146217	-2.835	2.835	0.0454334	-4.4601	4.10641e-05	-4.38654	4.38654	0.336352	-1.57196	0.0924932	-1.03389	1.03389
KAG1371648	A0A8B7C065	AT5G09810	EGU2621G0957-MONOMER	putative Actin	2831.6	2850.2	2828.7	2836.83	1726.8	1744.2	1612.3	1694.43	969.8	1011.1	924	968.3	133.648	58.5098	35.5742	4.71117	3.45306	3.67389	0.597297	-0.743479	0.00104742	-2.97988	2.97988	0.341331	-1.55076	0.000105942	-3.97493	3.97493	0.571459	-0.807277	0.000768059	-3.11461	3.11461
KAG1363715	A0A8B7BGV3	AT1G31340	#N/A	#N/A	2951.8	2518	2775.9	2748.57	1326	1487	1345.2	1386.07	984.7	1011.5	962.2	986.133	138.196	71.7998	20.1521	5.02794	5.18011	2.04355	0.504287	-0.987683	0.0161099	-1.79291	1.79291	0.358781	-1.47882	0.00585146	-2.23274	2.23274	0.711462	-0.491142	0.00968868	-2.01374	2.01374
KAG1328064	A0A8B7BQT4	AT1G72160	#N/A	Patellin-1	2695.5	2882.2	2763.3	2780.33	4066	4195.6	4315.4	4192.33	2069.8	1987.6	1771.2	1942.87	65.5244	101.843	125.94	2.35671	2.42928	6.48217	1.50785	0.592496	0.0025874	-2.58714	2.58714	0.698789	-0.517071	0.0166876	-1.77761	1.77761	0.463433	-1.10957	0.00499293	-2.30164	2.30164
KAG1362117	A0A8B7BVF7	AT4G09320	MONOMER8I-1867	nucleoside diphosphate kinase B	2785.9	2796.9	2688.7	2757.17	1651.3	1644	1569.5	1621.6	1400.2	1502.3	1454.2	1452.23	104.464	36.9606	41.7053	3.78883	2.27927	2.87181	0.58814	-0.765768	7.35658e-05	-4.13332	4.13332	0.526712	-0.924913	0.00113253	-2.94595	2.94595	0.895556	-0.159145	0.0552964	-1.2573	1.2573
KAG1364388	A0A8B7C9E2	AT1G16030	#N/A	heat shock 70 kDa protein	2560.1	2617.5	2524.7	2567.43	2984.5	3007.3	3173.6	3055.13	3707.6	3594.3	3564.2	3622.03	59.1705	84.2841	61.74	2.30465	2.75877	1.70457	1.18996	0.250909	0.0266294	-1.57464	1.57464	1.41076	0.496473	0.00222708	-2.65227	2.65227	1.18556	0.245564	0.0277797	-1.55627	1.55627
KAG1365307	A0A8B7CEU5	AT1G09210	EGU1685G0072-MONOMER	putative Calreticulin	2459.2	2498.3	2444.2	2467.23	1330	1337	1211	1292.67	982.6	970.3	940.6	964.5	51.1295	57.8177	17.6301	2.07234	4.47275	1.8279	0.523934	-0.932544	0.000684517	-3.16462	3.16462	0.390924	-1.35504	9.75636e-05	-4.01071	4.01071	0.746132	-0.422497	0.00793918	-2.10022	2.10022
AFI578431	A0A8B8ZRU5	AT1G13440	EGU2716G0002-MONOMER	glyceraldehyde-3-phosphate dehydrogenase, partial	2399.2	2340	2394.7	2377.97	1164.4	1015.9	916.5	1032.27	959	1090.7	1047.7	1032.47	76.5006	101.864	54.8347	3.21706	9.86802	5.31104	0.434096	-1.20391	0.00277902	-2.55611	2.55611	0.43418	-1.20363	0.0016736	-2.77635	2.77635	1.00019	0.000279493	0.998641	-0.000590502	0.000590502
KAG1337991	A0A8B9AAG1	AT5G60390	#N/A	putative Elongation factor 1-alpha	2209.1	2287.3	2218.3	2238.23	542.1	748.9	644.3	645.1	319.4	315.2	272.6	302.4	66.7586	84.4276	21.1414	2.98265	13.0875	6.99121	0.288218	-1.79477	0.000578553	-3.23766	3.23766	0.135107	-2.88783	0.000157443	-3.80288	3.80288	0.468765	-1.09306	0.0317971	-1.49761	1.49761
KAG1364539	A0A8B7CKZ1	AT5G35360	MONOMER8I-2371	putative Biotin carboxylase 1, chloroplastic	2114.7	2106.6	2122.2	2114.5	961.5	987.5	791.9	913.633	438.8	431	435.3	435.033	14.6944	86.7304	3.18991	0.694934	9.49292	0.733258	0.43208	-1.21063	0.00295832	-2.52895	2.52895	0.205738	-2.28112	4.90001e-06	-5.3098	5.3098	0.476157	-1.07049	0.0162553	-1.789	1.789
KAG1337875	A0A8B9A2X0	AT2G28930	MONOMER8I-1556	putative Receptor-like cytoplasmic kinase	2091	2080.1	2091.5	2087.53	2764.6	2633.3	2771	2722.97	2738.6	2829.5	2810.4	2792.83	99.5156	63.4577	39.1335	4.76714	2.33046	1.40121	1.30439	0.38338	0.00416791	-2.38008	2.38008	1.33786	0.41993	0.00182402	-2.73897	2.73897	1.02566	0.0365502	0.400331	-0.397581	0.397581
KAG1326805	A0A8B7BFK2	AT1G76550	MONOMER8I-2735	pyrophosphate--fructose 6-phosphate 1-phosphotransferase subunit alpha	2172.8	1850.7	2083.4	2035.63	1536.8	1522.6	1429.7	1496.37	1220.5	1192.5	1243.7	1218.9	102.405	47.4956	20.9329	5.03061	3.17406	1.71736	0.735087	-0.444014	0.0363421	-1.43959	1.43959	0.598782	-0.739898	0.0108249	-1.96557	1.96557	0.814573	-0.295884	0.0262983	-1.58007	1.58007
KAG1333893	A0A8B7C298	AT5G06390	#N/A	Fasciclin-like arabinogalactan protein 17	2122.3	2103.3	2047.6	2091.07	308.5	848.6	803	653.367	1050.8	1067.3	1052.5	1056.87	40.6126	244.567	7.41005	1.94219	37.4318	0.701134	0.312456	-1.67827	0.0166854	-1.77766	1.77766	0.50542	-0.984446	0.000455221	-3.34178	3.34178	1.61757	0.693829	0.140444	-0.852496	0.852496
KAG1331530	A0A8B7CPZ3	AT4G13940	EGU2490G0002-MONOMER	Adenosylhomocysteinase	2005.5	2080.3	2032.3	2039.37	1438.3	1354.2	1345.2	1379.23	1578.5	1642.5	1612.8	1611.27	35.1045	41.9277	26.1504	1.72134	3.03993	1.62297	0.676305	-0.564255	0.00520467	-2.28361	2.28361	0.790082	-0.339926	0.000153891	-3.81279	3.81279	1.16823	0.224329	0.0375918	-1.42491	1.42491
KAG1348090	A0A8B7BQY5	AT5G42740	EGU2441G1622-MONOMER	putative glucose-6-phosphate isomerase, cytosolic 1	1970.8	2056.7	2021.8	2016.43	1278.9	1188	1205.1	1224	1336.5	1371.7	1398.6	1368.93	37.2866	39.4429	25.4276	1.84914	3.22246	1.85747	0.607012	-0.720202	0.00435402	-2.36111	2.36111	0.678888	-0.558754	0.000861913	-3.06454	3.06454	1.11841	0.161449	0.0803255	-1.09515	1.09515
KAG1339211	A0A8B7BSL3	AT3G12580	#N/A	Heat shock cognate 70 kDa protein	1990.8	2081.4	2017.3	2029.83	1876.5	1841.6	1776.6	1831.57	1892.2	1881.4	1833.9	1869.17	80.0697	41.3965	25.3241	3.94465	2.26017	1.35483	0.902324	-0.148283	0.0420336	-1.3764	1.3764	0.920847	-0.118966	0.0361399	-1.44201	1.44201	1.02053	0.029317	0.0892991	-1.04915	1.04915
KAG1330548	A0A8B7BLV7	AT3G02520	#N/A	14-3-3-like protein	1864.3	1871.8	1908.3	1881.47	1062.5	1170.1	1052.4	1095	655.5	683.7	675.1	671.433	31.825	53.2636	11.8009	1.6915	4.86425	1.75757	0.581993	-0.780927	0.00328231	-2.48382	2.48382	0.356867	-1.48654	0.000116005	-3.93553	3.93553	0.613181	-0.705615	0.00585926	-2.23216	2.23216
KAG1358741	A0A8B7CK89	AT5G38480	#N/A	14-3-3-like protein	1962.5	1901.4	1894.4	1919.43	1288.5	1316.7	1214.3	1273.17	862	843.7	811.9	839.2	31.4556	43.1878	20.6993	1.63879	3.39215	2.46655	0.663303	-0.592259	0.00226854	-2.64425	2.64425	0.437212	-1.19359	0.000131894	-3.87978	3.87978	0.659144	-0.601335	0.00227179	-2.64363	2.64363
KAG1367723	A0A8B8J5E0	AT5G52920	MONOMER8I-3016	plastidial pyruvate kinase 2	1938	1899.6	1865.6	1901.07	355.9	625.4	514.6	498.633	148.5	161.4	145.7	151.867	92.9419	110.601	6.83732	4.88894	22.1808	4.50218	0.262291	-1.93076	0.00432477	-2.36404	2.36404	0.079885	-3.64593	0.000141791	-3.84835	3.84835	0.304566	-1.71517	0.0436197	-1.36032	1.36032
KAG1368697	A0A8B7BV95	AT3G22960	MONOMER8I-499	pyruvate kinase isozyme A, chloroplastic	1686.3	1741.6	1743.8	1723.9	219.7	600.4	461.5	427.2	170.9	131.4	151.1	151.133	35.7472	157.301	16.1258	2.07362	36.8214	10.6699	0.24781	-2.01269	0.00523717	-2.2809	2.2809	0.0876694	-3.51178	0.000342747	-3.46503	3.46503	0.353777	-1.49909	0.152987	-0.815345	0.815345
AKS268491	A0A8B7CS47	#N/A	#N/A	11S globulin isoform 2	1643	1682.3	1681.4	1668.9	2290.4	2435.8	2425.6	2383.93	2945.1	2857.7	2911.9	2904.9	23.6835	66.269	36.0226	1.41911	2.77982	1.24006	1.42845	0.514446	0.00224323	-2.64913	2.64913	1.74061	0.799591	0.000879448	-3.05579	3.05579	1.21853	0.285145	0.0172885	-1.76224	1.76224
KAG1334538	A0A8B7CPU7	AT2G22240	MONOMER8I-1820	Inositol-3-phosphate synthase	1645.4	1619.3	1676.6	1647.1	1325.7	1155	1166.5	1215.73	216.5	253.8	209.3	226.533	33.4308	77.8998	19.5032	2.02967	6.40764	8.60943	0.738105	-0.438101	0.0172364	-1.76355	1.76355	0.137535	-2.86213	0.000436265	-3.36025	3.36025	0.186335	-2.42403	0.0039229	-2.40639	2.40639
KAG1330289	A0A8B9ALH2	AT3G14940	EGU1876G0326-MONOMER	putative Phosphoenolpyruvate carboxylase 2	1656.5	1704.9	1605.4	1655.6	1168.7	1221.6	1161.2	1183.83	1383.5	1390.3	1287.1	1353.63	57.122	26.88	47.128	3.45023	2.27059	3.48159	0.715048	-0.483888	0.00086007	-3.06547	3.06547	0.817609	-0.290517	0.002305	-2.63733	2.63733	1.14343	0.193371	0.0220985	-1.65564	1.65564
KAG1330584	A0A8B7MSS6	AT2G01140	EGU1685G0101-MONOMER	fructose-bisphosphate aldolase 1, chloroplastic	1532.2	1571.4	1580.7	1561.43	885.9	860.9	805.4	850.733	568.9	603.5	553	575.133	64.4322	33.6411	21.0824	4.12647	3.95436	3.66566	0.544841	-0.876092	0.00273429	-2.56316	2.56316	0.368337	-1.4409	0.000441996	-3.35458	3.35458	0.676044	-0.564811	0.00562102	-2.25019	2.25019
KAG1346182	A0A8B9A549	AT5G55190	#N/A	GTP-binding nuclear protein Ran-A1	1642.8	1429.9	1537.3	1536.67	1460.5	1466	1386	1437.5	1177.9	1067.1	1152.8	1132.6	64.0482	36.4852	47.4355	4.16799	2.5381	4.1882	0.935466	-0.0962423	0.283256	-0.54782	0.54782	0.73705	-0.440166	0.00585505	-2.23247	2.23247	0.787896	-0.343924	0.0249812	-1.60239	1.60239
KAG1327231	A0A8B7CX75	AT2G05990	EGU0881G1273-MONOMER	enoyl-[acyl-carrier-protein] reductase [NADH] 1, chloroplastic	1511.6	1492	1503.8	1502.47	528.1	524.5	449.6	500.733	284.9	311.2	275.5	290.533	21.8894	36.1866	15.109	1.4569	7.22672	5.20044	0.333274	-1.58522	0.000706319	-3.151	3.151	0.193371	-2.37056	0.000165085	-3.78229	3.78229	0.580216	-0.785339	0.00893862	-2.04873	2.04873
KAG1339150	A0A8B9A3F6	AT3G09640	MONOMER8I-2959	L-ascorbate peroxidase, cytosolic	1474.7	1444.5	1490.1	1469.77	848.1	894.5	829.8	857.467	365.9	331.8	301	332.9	17.0005	27.2314	26.5067	1.15668	3.1758	7.96237	0.583403	-0.777435	0.00282853	-2.54844	2.54844	0.226499	-2.14243	0.000528297	-3.27712	3.27712	0.388237	-1.36499	0.00197293	-2.70489	2.70489
KAG1367678	A0A8B9AUU4	AT5G54960	EGU2621G1057-MONOMER	pyruvate decarboxylase 1	1465.1	1446	1480.8	1463.97	1748.4	1758.7	1794.1	1767.07	1335.3	1299.3	1281.5	1305.37	35.4083	19.5725	22.3788	2.41866	1.10763	1.71437	1.20704	0.271474	0.00106546	-2.97246	2.97246	0.891664	-0.165428	0.0169679	-1.77037	1.77037	0.73872	-0.436901	0.00385411	-2.41408	2.41408
KAG1359544	A0A8B7BJ45	AT5G08570	MONOMER8I-2828	Pyruvate kinase, cytosolic isozyme	1370.9	1422.2	1423.8	1405.63	1012.9	1000.5	1006.6	1006.67	806.6	811.7	812.9	810.4	25.7561	5.0625	2.7313	1.83235	0.502897	0.337031	0.716166	-0.481634	0.00263604	-2.57905	2.57905	0.576537	-0.794514	0.000674534	-3.171	3.171	0.805033	-0.31288	0.000704534	-3.1521	3.1521
KAG1354750	A0A8B7BR44	AT4G22670	EGU0206G1133-MONOMER	putative FAM10 family protein	1459.1	1421.7	1414.7	1431.83	873.8	846.7	799.9	840.133	849.5	933.3	877.7	886.833	26.1046	30.5248	34.8154	1.82316	3.63333	3.92582	0.586754	-0.769173	0.000406036	-3.39144	3.39144	0.619369	-0.691129	0.00414917	-2.38204	2.38204	1.05559	0.0780447	0.319844	-0.495062	0.495062
KAG1361553	A0A8B8ZCC6	AT5G43330	MONOMER8I-2885	Malate dehydrogenase, cytoplasmic	1418.8	1372.2	1399	1396.67	980.3	944.6	963.7	962.867	1010.6	984.3	1050.8	1015.23	30.954	14.5864	27.3455	2.21628	1.51489	2.69352	0.689403	-0.53658	5.55974e-05	-4.25495	4.25495	0.726897	-0.460176	0.00212703	-2.67223	2.67223	1.05439	0.0764034	0.0966156	-1.01495	1.01495
KAG1363572	A0A8B8ZK78	AT5G13420	EGU2407G0044-MONOMER	putative Cytochrome b-c1 complex subunit Rieske-4, mitochondrial	1331.1	1360.8	1339.6	1343.83	1206.4	1199	1134	1179.8	1095.2	1097.7	1126.6	1106.5	22.6845	32.5261	14.2494	1.68805	2.75692	1.28779	0.877936	-0.187812	0.0197174	-1.70515	1.70515	0.823391	-0.280351	0.0037019	-2.43157	2.43157	0.937871	-0.0925389	0.157005	-0.804086	0.804086
KAG1371259	A0A8B7C1P0	AT1G02850	MONOMER8I-1575	putative Beta-glucosidase 22	1386.6	1377	1327.2	1363.6	633.5	551.5	504	563	396.4	412.2	409.4	406	27.5788	53.4899	6.8838	2.0225	9.50087	1.69552	0.412878	-1.27621	0.000879553	-3.05574	3.05574	0.297741	-1.74787	0.000490124	-3.30969	3.30969	0.721137	-0.471655	0.0649131	-1.18767	1.18767
KAG1359148	A0A8B7BIK4	AT1G01090	EGU0531G0575-MONOMER	Pyruvate dehydrogenase E1 component subunit alpha	1353	1311.4	1327	1330.47	619.6	648.6	556.5	608.233	704.9	688.9	684.2	692.667	31.0139	38.4491	8.86052	2.33105	6.32144	1.27919	0.457158	-1.12924	0.00190738	-2.71956	2.71956	0.520619	-0.941699	0.000149585	-3.82511	3.82511	1.13882	0.187536	0.0788933	-1.10296	1.10296
KAG1365116	A0A8B7BGQ2	AT1G16300	MONOMER8I-1897	Glyceraldehyde-3-phosphate dehydrogenase GAPCP2, chloroplastic	1390.3	1297.5	1314.9	1334.23	47.7	435.7	345.9	276.433	185	139.8	145.5	156.767	47.4209	165.842	20.0991	3.55417	59.9934	12.8211	0.207185	-2.27101	0.0184544	-1.7339	1.7339	0.117496	-3.08932	0.000147888	-3.83007	3.83007	0.567105	-0.818313	0.458605	-0.338561	0.338561
KAG1347700	A0A8B7BV95	AT3G22960	MONOMER8I-499	pyruvate kinase isozyme A, chloroplastic	1303.8	1233.2	1274.2	1270.4		573.2	438.3	505.75	129.3	96	98.6	107.967	30.2064	67.45	15.1222	2.37771	13.3366	14.0064	0.398103	-1.32879	0.0745167	-1.12775	1.12775	0.0849864	-3.55662	0.000117856	-3.92865	3.92865	0.213478	-2.22784	0.10616	-0.974038	0.974038
KAG1334572	A0A8B9ANC6	#N/A	MONOMER8I-2544	Annexin-like protein RJ4	1313.8	1242.5	1253.1	1269.8	613.7	810.6	681.6	701.967	721.3	735.3	716.4	724.333	27.6274	81.664	8.00847	2.17573	11.6336	1.10563	0.552817	-0.855127	0.0180977	-1.74238	1.74238	0.570431	-0.809876	0.00209586	-2.67864	2.67864	1.03186	0.0452512	0.714859	-0.145779	0.145779
KAG1361551	A0A8B7CS47	#N/A	MONOMER8I-2897	Glutelin type-A 1	1269	1298.4	1241.5	1269.63	1054.2	1021.7	901.8	992.567	1240.6	1306.3	1205.7	1250.87	37.4783	65.5388	41.7065	2.9519	6.60296	3.33421	0.781774	-0.355176	0.0165166	-1.78208	1.78208	0.985219	-0.0214839	0.299082	-0.524209	0.524209	1.26023	0.333692	0.0192648	-1.71524	1.71524
KAG1342609	A0A8B7BPK0	#N/A	EGU0159G0242-MONOMER	putative nucleoredoxin 1-1	1211.7	1209	1190.2	1203.63	728.3	714.9	706.5	716.567	389.8	414.8	376	393.533	73.0773	8.9775	16.0585	6.07139	1.25285	4.0806	0.595336	-0.748223	5.21573e-05	-4.28269	4.28269	0.326954	-1.61284	0.000103819	-3.98372	3.98372	0.549193	-0.864615	0.00130856	-2.88321	2.88321
KAG1331790	A0A8B7BQH8	#N/A	#N/A	serine carboxypeptidase II-3	1007.1	1204.7	1133.9	1115.23	6612.7	6903.2	7255.2	6923.7	10640.8	10409.9	10781.3	10610.7	75.6619	262.7	153.113	6.7844	3.79421	1.44301	6.2083	2.6342	0.000745658	-3.12746	3.12746	9.5143	3.2501	0.000233655	-3.63142	3.63142	1.53251	0.6159	0.00213562	-2.67048	2.67048
KAG1339074	A0A8B7C6P9	AT2G40170	#N/A	em protein H5	1000.8	1159.7	1117.1	1092.53	3568.1	3486.1	3982.1	3678.77	5677.2	5412.9	5525.5	5538.53	49.6173	217.086	108.293	4.54149	5.90105	1.95526	3.36719	1.75154	0.00360801	-2.44273	2.44273	5.06944	2.34183	0.000772027	-3.11237	3.11237	1.50554	0.590282	0.00793958	-2.1002	2.1002
KAG1347827	A0A8B8ZZR1	AT5G15490	MONOMER8I-2048	putative UDP-glucose 6-dehydrogenase 4	1078.9	1118.8	1116.9	1104.87	334.5	397.7	383.8	372	327.1	319.4	282.7	309.733	38.9394	27.1169	19.3722	3.52435	7.28949	6.25448	0.336692	-1.5705	8.42474e-05	-4.07444	4.07444	0.280335	-1.83477	0.000900918	-3.04531	3.04531	0.832616	-0.264276	0.158017	-0.801297	0.801297
KAG1331573	A0A8B7BFV4	AT1G05510	#N/A	oil body-associated protein 1A-like	1093.1	1002.8	1070.1	1055.33	212.4	377.2	286.8	292.133	1314.5	1259.7	1414.1	1329.43	28.2724	67.3849	63.9119	2.679	23.0665	4.80745	0.276816	-1.853	0.00935087	-2.02915	2.02915	1.25973	0.333113	0.0172019	-1.76442	1.76442	4.55078	2.18611	0.00556996	-2.25415	2.25415
KAG1364013	A0A8B9AE85	AT1G12000	EGU1685G0737-MONOMER	Pyrophosphate--fructose 6-phosphate 1-phosphotransferase subunit beta	1045.8	1067.7	1069.3	1060.93	692.9	650	607.1	650	658.6	673.5	689.2	673.767	19.8856	35.0277	12.4938	1.87435	5.38888	1.85432	0.612668	-0.706822	0.00591041	-2.22838	2.22838	0.63507	-0.655013	0.000110509	-3.9566	3.9566	1.03656	0.0518093	0.55269	-0.257519	0.257519
KAG1369984	A0A8B9B156	AT1G77120	MONOMER8I-2100	Alcohol dehydrogenase 1	1015.4	1027.3	1054.7	1032.47	872.8	847.9	816	845.567	786	830.9	808.2	808.367	41.7502	23.2471	18.3307	4.04373	2.7493	2.26763	0.818977	-0.288105	0.0217064	-1.66341	1.66341	0.782947	-0.353013	0.00427719	-2.36884	2.36884	0.956006	-0.0649087	0.274349	-0.561697	0.561697
KAG1359722	A0A8B7C171	AT3G24170	MONOMER8I-2251	glutathione reductase, cytosolic	1090.1	952.4	1023.8	1022.1	771.3	834.3	741.8	782.467	911.2	938.3	929.4	926.3	41.0479	38.5796	11.2786	4.01604	4.93052	1.2176	0.765548	-0.385435	0.0603338	-1.21944	1.21944	0.906271	-0.141985	0.181678	-0.740697	0.740697	1.18382	0.24345	0.0271887	-1.56561	1.56561
KAG1359707	A0A8B8ZHH7	AT5G43940	MONOMER8I-2100	putative Alcohol dehydrogenase class-3	1041.2	1015.2	1007.5	1021.3	672.1	688.8	674.1	678.333	811.9	826.9	827	821.933	24.839	7.44595	7.09476	2.43209	1.09768	0.863179	0.664186	-0.59034	0.00148294	-2.82888	2.82888	0.804791	-0.313313	0.00571387	-2.24307	2.24307	1.2117	0.277027	0.00105856	-2.97528	2.97528
KAG1360972	A0A8B7CY51	AT3G51260	#N/A	Proteasome subunit alpha type	964.6	980	992	978.867	781.8	821.6	774	792.467	1059.8	1016.5	1077.6	1051.3	12.5586	20.845	25.6579	1.28298	2.6304	2.44059	0.809576	-0.304762	0.00850316	-2.07042	2.07042	1.074	0.10299	0.0576011	-1.23957	1.23957	1.32662	0.407752	0.015691	-1.80435	1.80435
KAG1348103	A0A8B7BX91	AT4G14960	#N/A	Tubulin alpha chain	979.2	1004.8	977.7	987.233	160.3	212.2	156.4	176.3	85.6	84	64.1	77.9	15.8643	25.435	9.77991	1.60694	14.4271	12.5544	0.17858	-2.48536	0.000128482	-3.89116	3.89116	0.0789074	-3.6637	8.00551e-05	-4.09661	4.09661	0.44186	-1.17834	0.0246523	-1.60814	1.60814
KAG1346418	A0A8B7CTR7	AT4G33070	EGU2621G1057-MONOMER	pyruvate decarboxylase 1	955.4	974.4	960.4	963.4	1245.4	1200.2	1344.7	1263.43	686.5	635.7	620.3	647.5	16.7036	60.3543	28.2847	1.73381	4.77701	4.3683	1.31143	0.391143	0.0227362	-1.64328	1.64328	0.672099	-0.573255	0.00549006	-2.26042	2.26042	0.512492	-0.964397	0.00767064	-2.11517	2.11517
KAG1346710	A0A8B7C0Q6	AT1G65980	EGU2441G2269-MONOMER	peroxiredoxin-2C	974	927.4	942.8	948.067	399.1	404.3	356.5	386.633	170.7	177.6	164.4	170.9	18.3476	21.413	5.39073	1.93527	5.53832	3.15432	0.407812	-1.29402	0.00119766	-2.92167	2.92167	0.180262	-2.47184	0.000395305	-3.40307	3.40307	0.442021	-1.17781	0.00299193	-2.52405	2.52405
KAG1355122	A0A8B7CD32	AT5G42020	#N/A	Luminal-binding protein 5	947	978.7	941.6	955.767	685	663.3	636.6	661.633	686.1	630.9	645	654	28.9265	19.7943	23.4167	3.02653	2.99174	3.58053	0.692254	-0.530627	0.00307371	-2.51234	2.51234	0.684267	-0.547368	0.00691157	-2.16042	2.16042	0.988463	-0.0167413	0.605207	-0.218096	0.218096
KAG1361301	A0A8B7CVA4	AT3G48990	EGU0709G0903-MONOMER	oxalate--CoA ligase	891	908.9	913.9	904.6	659	617	666.6	647.533	528.1	500.6	453.6	494.1	18.62	21.8121	30.7598	2.05837	3.36849	6.22542	0.715823	-0.482326	0.00484996	-2.31426	2.31426	0.546208	-0.872477	0.00466581	-2.33107	2.33107	0.76305	-0.390151	0.0363422	-1.43959	1.43959
KAG1363330	A0A8B9AX62	AT4G34200	EGU2121G0058-MONOMER	putative D-3-phosphoglycerate dehydrogenase 1, chloroplastic	894.9	941.4	885.8	907.367	528.9	567.6	511.5	536	411.3	395.4	385.5	397.4	24.2842	23.4465	10.6273	2.67634	4.37435	2.67421	0.59072	-0.759453	5.23557e-05	-4.28104	4.28104	0.437971	-1.19109	0.00133483	-2.87457	2.87457	0.741418	-0.431641	0.0146693	-1.83359	1.83359
KAG1371245	A0A8B7MTV4	#N/A	MONOMER8I-1914	biotin carboxyl carrier protein of acetyl-CoA carboxylase	880.7	868.7	872.2	873.867	398.3	377.2	323.2	366.233	98.6	79.8	89.7	89.3667	14.5373	31.6249	7.67869	1.66356	8.63518	8.59234	0.419095	-1.25465	0.00168265	-2.77401	2.77401	0.102266	-3.2896	7.88586e-06	-5.10315	5.10315	0.244016	-2.03495	0.00608332	-2.21586	2.21586
KAG1360757	A0A8B7D4I1	#N/A	#N/A	Two-component response regulator 24	860.1	904.5	865.2	876.6	220.7	349.5	339	303.067	288.1	279.6	258	275.233	18.7893	58.3996	12.6703	2.14343	19.2695	4.60346	0.34573	-1.53228	0.00348905	-2.45729	2.45729	0.313978	-1.67126	0.000667693	-3.17542	3.17542	0.908161	-0.13898	0.618754	-0.208482	0.208482
KAG1370202	A0A8B7C3N1	#N/A	MONOMER8I-1804	alpha-mannosidase	862.2	854.9	844.4	853.833	1696.2	1757.7	1880.1	1778	1992	1927.2	1979.2	1966.13	25.8491	76.4368	28.0216	3.02741	4.29903	1.42521	2.08237	1.05823	0.004078	-2.38955	2.38955	2.30271	1.20333	0.000324833	-3.48834	3.48834	1.10581	0.145106	0.0821807	-1.08523	1.08523
KAG1335211	A0A8B7BRR1	#N/A	#N/A	embryonic protein DC-8	797.8	796.8	835.2	809.933	1462.2	1565.7	1633	1553.63	2832.6	2793.3	2901.5	2842.47	32.4026	70.2489	44.72	4.00065	4.52159	1.57328	1.91822	0.939771	0.00295513	-2.52942	2.52942	3.50951	1.81127	9.85739e-05	-4.00624	4.00624	1.82956	0.871497	0.00108348	-2.96518	2.96518
KAG1371480	A0A8B7BPA8	AT3G10920	MONOMER8I-1619	putative Superoxide dismutase	749	738.2	785.3	757.5	1168.4	1111.2	1151.3	1143.63	1164.8	1237.3	1223.3	1208.47	18.8617	23.9728	31.4015	2.48999	2.0962	2.59846	1.50975	0.594307	0.00187768	-2.72638	2.72638	1.59534	0.67386	0.00303608	-2.51769	2.51769	1.05669	0.0795531	0.226898	-0.644169	0.644169
KAG1338955	A0A8B7BPL4	#N/A	#N/A	Vicilin-like seed storage protein	769	790.9	775.8	778.567	2074.6	2140.1	2381.7	2198.8	4270.6	3958	4259.8	4162.8	25.6466	132.065	144.883	3.29408	6.00624	3.48041	2.82416	1.49782	0.00432291	-2.36422	2.36422	5.34675	2.41866	0.0010298	-2.98725	2.98725	1.89321	0.920838	0.00354778	-2.45004	2.45004
AOX129841	D4PB96	ATMG01190	EGU1868G0042-MONOMER	ATPase subunit 1	730.5	724.5	732.5	729.167	391.2	391.5	366.9	383.2	331.6	304.4	290.4	308.8	47.712	11.5265	17.1052	6.54337	3.00796	5.53924	0.525531	-0.928151	0.000831713	-3.08003	3.08003	0.423497	-1.23958	0.000879035	-3.05599	3.05599	0.805846	-0.311425	0.0113868	-1.9436	1.9436
KAG1342580	A0A8B7BQ46	AT3G43190	MONOMER8I-354	sucrose synthase 2	823.1	659.5	725.2	735.933	191.1	225.6	166.6	194.433	127	112	109.4	116.133	55.2804	24.2017	7.75686	7.5116	12.4473	6.67927	0.2642	-1.9203	0.0112109	-1.95036	1.95036	0.157804	-2.66379	0.00476631	-2.32182	2.32182	0.597291	-0.743493	0.0477996	-1.32058	1.32058
KAG1364380	A0A8B7C9D8	AT2G24200	#N/A	Leucine aminopeptidase 2, chloroplastic	672.3	674.6	700.4	682.433	827.6	748.6	732.1	769.433	616.3	653.3	608.2	625.933	20.8827	41.678	19.6317	3.06004	5.41671	3.13638	1.12748	0.173108	0.138557	-0.858371	0.858371	0.917208	-0.124679	0.110007	-0.958578	0.958578	0.813499	-0.297787	0.0543438	-1.26485	1.26485
KAG1358926	A0A8B7CVI4	AT3G01650	MONOMER8I-729	hypothetical protein COCNU_08G003720	676.4	731.7	698	702.033	1323.3	1346.2	1475.1	1381.53	1652	1570.7	1648.3	1623.67	19.4881	66.8189	37.4835	2.77595	4.83657	2.30857	1.9679	0.976659	0.00530471	-2.27534	2.27534	2.31281	1.20964	0.00206609	-2.68485	2.68485	1.17526	0.232985	0.033891	-1.46992	1.46992
KAG1366389	A0A8B8J8J7	AT1G72330	MONOMER8I-2575	alanine aminotransferase 2	696.2	727.8	694.7	706.233	339.3	347.4	304.6	330.433	213	184.2	212	203.067	15.6677	18.5638	13.347	2.21849	5.61802	6.57271	0.467881	-1.09579	0.00068715	-3.16295	3.16295	0.287535	-1.79819	0.00161052	-2.79303	2.79303	0.614547	-0.702406	0.0246776	-1.6077	1.6077
KAG1330065	A0A8B7MTK7	#N/A	MONOMER8I-936	Polyadenylate-binding protein 5	683.3	711	683.9	692.733	400.6	411.5	397.7	403.267	233.6	212.4	225.9	223.967	16.9316	5.94101	8.76217	2.44417	1.47322	3.91226	0.582138	-0.780566	0.000312391	-3.5053	3.5053	0.323309	-1.62902	0.00103709	-2.98418	2.98418	0.555381	-0.84845	0.00309397	-2.50948	2.50948
KAG1359660	A0A8B8J4L0	AT2G28000	#N/A	RuBisCO large subunit-binding protein subunit alpha, chloroplastic	680.3	652.5	683.2	672	412.6	414.3	385.2	404.033	221.2	215.2	208.8	215.067	14.384	13.3352	5.06316	2.14047	3.30053	2.35423	0.60124	-0.733987	0.0041247	-2.38461	2.38461	0.32004	-1.64368	0.000554524	-3.25608	3.25608	0.532299	-0.90969	0.00124168	-2.90599	2.90599
AHN532021	A0A8B7C5C9	AT3G15730	MONOMER8I-901	phospholipase D alpha 1-like protein	695.2	695.9	680.3	690.467	420.4	439.9	367.7	409.333	514	522.4	497.8	511.4	9.44699	30.4966	10.2098	1.3682	7.45031	1.99644	0.592836	-0.754296	0.00348631	-2.45763	2.45763	0.740658	-0.43312	0.000245904	-3.60924	3.60924	1.24935	0.321176	0.0192729	-1.71505	1.71505
KAG1371174	A0A8B7CC81	AT2G41530	EGU2028G0200-MONOMER	S-formylglutathione hydrolase	676.2	670.6	679.4	675.4	496	528.2	462.1	495.433	604	558.3	607.6	589.967	8.89802	26.9882	22.4399	1.31744	5.44739	3.80359	0.733541	-0.447051	0.0141296	-1.84987	1.84987	0.873507	-0.195109	0.0238447	-1.62261	1.62261	1.19081	0.251943	0.108603	-0.96416	0.96416
KAG1366388	A0A8B9A8X5	AT3G14290	#N/A	proteasome subunit alpha type-5	695.9	692	678.6	688.833	518.3	507.2	496.1	507.2	671.4	583.7	608.7	621.267	20.9912	9.06311	36.8896	3.04735	1.78689	5.9378	0.736317	-0.4416	0.00013661	-3.86452	3.86452	0.901911	-0.148942	0.108056	-0.966352	0.966352	1.22489	0.292658	0.0356234	-1.44827	1.44827
KAG1347934	A0A8B7C665	#N/A	#N/A	serpin-ZXA	637.3	651.7	666.6	651.867	793.6	669	713.8	725.467	487.4	506.4	472.9	488.9	9.60985	51.5323	13.7174	1.4742	7.10334	2.80577	1.11291	0.154332	0.223567	-0.650593	0.650593	0.75	-0.415037	0.00883903	-2.0536	2.0536	0.673911	-0.56937	0.0294369	-1.53111	1.53111
KAG1361262	A0A8B7CD32	AT5G42020	#N/A	Luminal-binding protein 5	651	657.8	663.5	657.433	645.9	579.5	526.8	584.067	631.8	674.5	627.3	644.533	7.30283	48.7295	21.2691	1.11081	8.34314	3.29993	0.888404	-0.170712	0.193786	-0.712678	0.712678	0.980378	-0.0285896	0.495051	-0.30535	0.30535	1.10353	0.142122	0.246597	-0.608013	0.608013
KAG1326274	A0A8B7CVF4	#N/A	#N/A	subtilisin-like protease SBT1.5	648.4	644.1	662.9	651.8	645.3	667.3	658.7	657.1	578.3	549.2	557.6	561.7	10.7383	9.05244	12.2287	1.64749	1.37764	2.17708	1.00813	0.0116836	0.613967	-0.211855	0.211855	0.861767	-0.21463	0.013164	-1.88061	1.88061	0.854817	-0.226313	0.0239155	-1.62132	1.62132
KAG1359664	A0A8B7C198	AT5G03340	EGU0799G0010-MONOMER	Cell division cycle protein 48	629.7	635	650	638.233	392.2	379.8	381.8	384.6	272.2	238.2	267	259.133	7.22719	5.43568	14.9536	1.13237	1.41333	5.7706	0.602601	-0.730725	0.00122818	-2.91074	2.91074	0.406017	-1.30039	0.000920748	-3.03586	3.03586	0.673774	-0.569664	0.00424953	-2.37166	2.37166
KAG1337976	A0A8B9AAI1	AT1G07890	MONOMER8I-2959	L-ascorbate peroxidase, cytosolic	638.1	647.4	645.4	643.633	120.7	253	193.7	189.133	161.1	151.8	165.9	159.6	10.5998	54.1077	5.8532	1.64687	28.6082	3.66742	0.293853	-1.76684	0.00605726	-2.21772	2.21772	0.247967	-2.01178	0.000144951	-3.83878	3.83878	0.843849	-0.244943	0.545128	-0.263501	0.263501
KAG1363442	A0A8B7BKD0	#N/A	#N/A	putative protein XRI1	628.4	656.1	626.1	636.867	1033.3	1073.7	1119.7	1075.57	680.2	635.7	611.4	642.433	15.412	35.2973	28.4882	2.41997	3.28174	4.43442	1.68884	0.756034	0.00396133	-2.40216	2.40216	1.00874	0.0125554	0.832551	-0.079589	0.079589	0.597298	-0.743478	0.0105613	-1.97628	1.97628
KAG1346596	A0A8B7D052	AT4G29120	EGU2441G0850-MONOMER	putative 3-hydroxyisobutyrate dehydrogenase-like 1, mitochondrial	606.7	634.6	616.4	619.233	670.5	701.5	686.7	686.233	774.6	728.9	747.5	750.333	12.2512	12.66	18.7642	1.97845	1.84485	2.50078	1.1082	0.148216	0.000783959	-3.10571	3.10571	1.21171	0.277049	0.0252731	-1.59734	1.59734	1.09341	0.128832	0.101957	-0.991583	0.991583
KAG1358889	A0A8B7CIK0	AT5G49910	#N/A	hypothetical protein COCNU_08G003350	626.5	643	616	628.5	161.9	296.8	245.7	234.8	179.1	171.2	163.6	171.3	14.1981	55.6094	6.32824	2.25904	23.6837	3.69425	0.373588	-1.42048	0.00831516	-2.08013	2.08013	0.272554	-1.87539	0.000264799	-3.57708	3.57708	0.729557	-0.454907	0.27179	-0.565766	0.565766
KAG1339061	A0A8B7BFB0	AT5G54960	EGU2621G1057-MONOMER	pyruvate decarboxylase 1	603.9	640.5	613.9	619.433	840.3	864.9	869.3	858.167	469.9	485.8	427.8	461.167	12.8546	12.7607	24.4704	2.07521	1.48697	5.3062	1.38541	0.470309	0.00142595	-2.84589	2.84589	0.744498	-0.425661	0.00903364	-2.04414	2.04414	0.537386	-0.89597	0.003166	-2.49949	2.49949
KAG1365525	A0A8B7BWG5	AT2G40980	#N/A	putative protein kinase superfamily protein	612.6	629.5	607.6	616.567	406.4	426.1	379.8	404.1	515.8	438	446.9	466.9	13.1112	18.9717	34.7679	2.12649	4.69481	7.44654	0.655404	-0.609545	0.00131394	-2.88142	2.88142	0.757258	-0.401143	0.0330122	-1.48133	1.48133	1.15541	0.208401	0.156074	-0.806669	0.806669
KAG1361822	A0A8B7BTU3	AT5G03300	EGU0206G1137-MONOMER	adenosine kinase 2	598.1	631.7	600.4	610.067	336.6	441.1	379.9	385.867	468.7	400.8	444	437.833	21.5031	42.8701	28.0609	3.52472	11.1101	6.40904	0.632499	-0.660864	0.0082974	-2.08106	2.08106	0.717681	-0.478585	0.0296784	-1.52756	1.52756	1.13468	0.182279	0.40885	-0.388436	0.388436
KAG1331437	A0A8B7CH02	AT1G27310	#N/A	Nuclear transport factor 2A	639.6	579.6	591.9	603.7	456.1	441	389.6	428.9	297.5	356.8	327.2	327.167	21.5958	28.4648	24.2091	3.57725	6.63671	7.39963	0.710452	-0.49319	0.011485	-1.93987	1.93987	0.541936	-0.883806	0.015595	-1.80702	1.80702	0.762804	-0.390616	0.0730727	-1.13625	1.13625
KAG1362214	A0A8B7C4L7	AT4G12400	#N/A	putative Hsp70-Hsp90 organizing protein 3	583.9	582.1	577.3	581.1	241	262.1	202	235.033	292	242.6	264.3	266.3	12.5592	24.8958	20.217	2.16127	10.5925	7.59181	0.404463	-1.30592	0.00214192	-2.6692	2.6692	0.458269	-1.12573	0.001908	-2.71942	2.71942	1.13303	0.180187	0.346268	-0.460588	0.460588
KAG1362055	A0A8B7BVK4	AT4G17830	MONOMER8I-2995	acetylornithine deacetylase	570.7	546.1	570.4	562.4	244	252.1	203.2	233.1	178.7	174.2	159.4	170.767	17.1876	21.3995	8.24473	3.05611	9.18041	4.82807	0.414474	-1.27065	0.00410786	-2.38638	2.38638	0.303639	-1.71957	0.000829825	-3.08101	3.08101	0.73259	-0.448923	0.0245696	-1.6096	1.6096
KAG1360773	A0A8B7CLQ7	AT5G52640	#N/A	Heat shock protein 83	528.1	533.4	563.5	541.667	363.6	340.4	295.2	333.067	193	194.4	171.9	186.433	30.0333	28.4016	10.2925	5.54462	8.52729	5.52074	0.614892	-0.701594	0.0213299	-1.67101	1.67101	0.344185	-1.53875	0.00261982	-2.58173	2.58173	0.559748	-0.837151	0.0085645	-2.0673	2.0673
KAG1327809	A0A8B7CAH7	AT4G15530	MONOMER8I-587	Pyruvate, phosphate dikinase, chloroplastic	611.3	594.7	560.1	588.7	100.9	187.8	156.6	148.433	139.5	154.2	145.7	146.467	21.3019	35.9437	6.02569	3.61846	24.2154	4.11403	0.252137	-1.98772	0.00628906	-2.20141	2.20141	0.248797	-2.00696	0.00140479	-2.85239	2.85239	0.986751	-0.0192427	0.934898	-0.0292359	0.0292359
KAG1331666	A0A8B7CKY0	AT5G03630	EGU0122G0007-MONOMER	monodehydroascorbate reductase 3, cytosolic	575.4	552.2	558.4	562	451.3	461.6	472.9	461.933	487.9	467.2	476.4	477.167	10.5042	8.82131	8.46811	1.86908	1.90965	1.77467	0.821945	-0.282885	0.0143235	-1.84395	1.84395	0.849051	-0.236077	0.000351057	-3.45462	3.45462	1.03298	0.0468086	0.290557	-0.536769	0.536769
KAG1326619	A0A8B7BT51	AT4G31990	EGU1496G0139-MONOMER	Aspartate aminotransferase, chloroplastic	548.3	541.6	556.8	548.9	717.6	652.4	666	678.667	469.7	506.8	439.7	472.067	11.4174	28.0843	27.4445	2.08005	4.13816	5.8137	1.23641	0.30616	0.0224371	-1.64903	1.64903	0.860023	-0.217553	0.0838754	-1.07637	1.07637	0.69558	-0.523713	0.0219599	-1.65837	1.65837
KAG1368351	A0A8B7D5T0	#N/A	#N/A	phosphatidylglycerol/phosphatidylinositol transfer protein	552.2	578.4	555.1	561.9	361	375.3	358.4	364.9	373.1	361	344.4	359.5	10.8683	7.43012	11.7646	1.9342	2.03621	3.2725	0.649404	-0.622812	0.000304515	-3.51639	3.51639	0.639794	-0.644322	0.0033871	-2.47017	2.47017	0.985201	-0.0215094	0.600055	-0.221809	0.221809
KAG1367917	A0A8B7C6X4	AT1G53310	EGU1876G0326-MONOMER	Phosphoenolpyruvate carboxylase, housekeeping isozyme	546.2	548.5	549.2	547.967	411.8	450.8	435.2	432.6	513	496.2	516.7	508.633	5.73219	16.0275	8.92051	1.04608	3.70492	1.75382	0.789464	-0.341054	0.00836217	-2.07768	2.07768	0.928219	-0.107462	0.0261341	-1.58279	1.58279	1.17576	0.233592	0.0432046	-1.36447	1.36447
KAG1330666	A0A8B7BNQ9	AT1G53540	#N/A	18.1 kDa class I heat shock protein	550	533.1	545.3	542.8	453.3	396.6	387.8	412.567	359.8	399.8	383.2	380.933	15.8943	29.026	16.4084	2.9282	7.03547	4.30742	0.760071	-0.395793	0.0182307	-1.7392	1.7392	0.701793	-0.510882	0.0101416	-1.9939	1.9939	0.923326	-0.115089	0.415054	-0.381895	0.381895
KAG1358590	A0A8B7BG50	AT1G10370	MONOMER8I-2973	glutathione S-transferase U17-like	578.7	569.5	542.1	563.433	328	276.1	268.2	290.767	319.6	359.6	346.3	341.833	19.453	26.5247	16.6326	3.45258	9.12235	4.86569	0.516062	-0.954383	0.00204251	-2.68984	2.68984	0.606697	-0.720952	0.0074133	-2.12999	2.12999	1.17563	0.233431	0.228456	-0.641197	0.641197
KAG1339186	A0A8B7C9G8	AT2G28680	#N/A	glutelin type-D 1	524.5	547.1	531.2	534.267	473.5	449.4	454.8	459.233	376.6	329.4	340.9	348.967	25.6328	10.3261	20.0958	4.79775	2.24856	5.75867	0.859558	-0.218333	0.0308728	-1.51042	1.51042	0.653169	-0.614471	0.0117944	-1.92832	1.92832	0.75989	-0.396138	0.00390568	-2.4083	2.4083
KAG1346722	A0A8B9ABX0	AT5G11520	EGU2441G2399-MONOMER	putative Aspartate aminotransferase 3, chloroplastic	470.1	495.6	499.2	488.3	546.1	533.3	570.2	549.867	804.2	861.7	819.4	828.433	12.132	15.298	24.3278	2.48454	2.78213	2.9366	1.12608	0.171314	0.0360691	-1.44286	1.44286	1.69657	0.762618	0.00159241	-2.79795	2.79795	1.50661	0.591304	0.00798888	-2.09751	2.09751
KAG1342335	A0A8B7CT16	AT1G78300	#N/A	14-3-3-like protein B	510.6	494.2	491.1	498.633	403	356	343.4	367.467	188.9	186	183.1	186	12.1034	25.647	2.36784	2.42731	6.97941	1.27303	0.736948	-0.440366	0.00840038	-2.0757	2.0757	0.37302	-1.42268	0.000210232	-3.6773	3.6773	0.506168	-0.982311	0.00822042	-2.08511	2.08511
KAG1361204	A0A8B7CNW1	AT1G16470	#N/A	putative Proteasome subunit alpha type-2-A	486.8	486.3	469.7	480.933	353.1	368.8	349.2	357.033	454.2	477	455.5	462.233	13.4568	8.47126	10.4551	2.79806	2.37268	2.26186	0.742376	-0.429778	0.00160901	-2.79344	2.79344	0.961117	-0.0572156	0.118764	-0.925315	0.925315	1.29465	0.372563	0.000406666	-3.39076	3.39076
KAG1331899	A0A8B9AQR6	#N/A	#N/A	putative myosin-9	472	452.3	455.1	459.8	388.7	373.5	366	376.067	205.4	224.6	210.9	213.633	11.7017	9.44328	8.07314	2.54495	2.51107	3.77897	0.817892	-0.290018	0.00126524	-2.89783	2.89783	0.464622	-1.10587	0.00209032	-2.67979	2.67979	0.568073	-0.815852	0.00422023	-2.37466	2.37466
KAG1367826	A0A8B7CBX8	AT1G56070	#N/A	Elongation factor 2	433.2	460.4	449.5	447.7	259	258.4	248	255.133	144	162	146.6	150.867	12.9884	5.04997	7.94369	2.90114	1.97935	5.26537	0.569876	-0.811281	0.00226708	-2.64453	2.64453	0.336982	-1.56926	0.000184428	-3.73417	3.73417	0.591325	-0.757977	0.0028288	-2.5484	2.5484
KAG1326127	A0A8B7D4Z0	AT1G48030	EGU1685G1727-MONOMER	dihydrolipoyl dehydrogenase 1, mitochondrial	422.3	427.7	436.3	428.767	260.8	265.2	230.5	252.167	557.1	516.4	526	533.167	18.2229	15.4256	17.3713	4.25006	6.11722	3.25814	0.588121	-0.765815	0.00676811	-2.16953	2.16953	1.24349	0.314394	0.0205537	-1.68711	1.68711	2.11434	1.08021	0.00280051	-2.55276	2.55276
KAG1346642	A0A8B7CIM2	AT4G26270	MONOMER8I-2492	ATP-dependent 6-phosphofructokinase 3	413.2	471.1	435.5	439.933	528.2	492.5	522.4	514.367	273.4	249.2	223.4	248.667	20.9912	15.6423	20.4159	4.77144	3.04108	8.21015	1.16919	0.225512	0.115279	-0.93825	0.93825	0.565237	-0.823072	0.0178317	-1.74881	1.74881	0.483442	-1.04858	0.00405813	-2.39167	2.39167
KAG1370270	A0A8B7BKL6	AT1G47980	#N/A	desiccation-related protein PCC13-62	419.6	462	433.5	438.367	690.5	714.9	725.7	710.367	593.6	627.3	540.4	587.1	13.0471	14.7235	35.7733	2.97629	2.07267	6.09322	1.62049	0.696426	0.00173921	-2.75965	2.75965	1.33929	0.421468	0.0194782	-1.71045	1.71045	0.826475	-0.274958	0.0582687	-1.23456	1.23456
KAG1331267	A0A8B9A3L2	AT3G03080	MONOMER8I-2133	hypothetical protein COCNU_02G012350	430	440.4	432.1	434.167	193.2	162.1	142.7	166	93.9	90.6	94.5	93	16.72	20.8002	1.71464	3.85105	12.5302	1.8437	0.382342	-1.38707	0.00354417	-2.45049	2.45049	0.214203	-2.22295	0.000161662	-3.79139	3.79139	0.560241	-0.835881	0.038585	-1.41358	1.41358
KAG1326685	A0A8B7CES2	AT3G07720	MONOMER8I-763	nitrile-specifier protein 5	438.9	475.6	424.3	446.267	434.5	444.8	430.4	436.567	449.7	438	452.8	446.833	20.6786	6.05769	6.37303	4.63369	1.38757	1.42627	0.978264	-0.0317041	0.470088	-0.327821	0.327821	1.00127	0.00183076	0.979722	-0.00889734	0.00889734	1.02352	0.0335348	0.362896	-0.440218	0.440218
KAG1334460	A0A8B7CTE8	AT3G47520	MONOMER8I-771	malate dehydrogenase, chloroplastic	448.5	425.2	411.7	428.467	194	219.2	197.6	203.6	120.9	108.2	100.7	109.933	19.3185	11.1283	8.3372	4.50875	5.46579	7.58387	0.475183	-1.07345	0.00442026	-2.35455	2.35455	0.256574	-1.96255	0.000232033	-3.63445	3.63445	0.539948	-0.889109	0.0136565	-1.86466	1.86466
KAG1368796	A0A8B7CD57	#N/A	#N/A	hypothetical protein COCNU_14G012640	392.7	403	395.2	396.967	506.4	438.3	492.3	479	663.3	711.1	703.9	692.767	7.49733	29.3493	21.0424	1.88866	6.1272	3.03744	1.20665	0.271008	0.0751425	-1.12411	1.12411	1.74515	0.803352	0.00180987	-2.74235	2.74235	1.44628	0.532344	0.0236556	-1.62607	1.62607
KAG1331723	A0A8B7CDT3	AT3G06050	MONOMER8I-2867	peroxiredoxin-2F, mitochondrial	391.9	411	389.4	397.433	269.1	228.4	231	242.833	226.7	228	212.2	222.3	14.8506	18.6036	7.16147	3.73661	7.66107	3.22153	0.611004	-0.710746	0.0123852	-1.9071	1.9071	0.559339	-0.838205	0.000894449	-3.04844	3.04844	0.915443	-0.127459	0.233233	-0.63221	0.63221
KAG1331384	A0A8B8J3Q6	AT3G48330	#N/A	Protein-L-isoaspartate O-methyltransferase	360.3	385	386	377.1	251.5	256.5	255.7	254.567	213	207	193.1	204.367	11.3638	2.19292	8.3348	3.01347	0.861432	4.07836	0.675064	-0.566904	0.00314349	-2.50259	2.50259	0.541943	-0.883787	0.00598583	-2.22288	2.22288	0.802802	-0.316884	0.0187161	-1.72778	1.72778
KAG1335361	A0A8B7C481	AT5G25880	MONOMER8I-2362	NADP-dependent malic enzyme	363.2	363.5	383.8	370.167	200.4	211.3	192.3	201.333	175.6	191	181.6	182.733	7.24086	7.78474	6.33789	1.95611	3.86659	3.46838	0.543899	-0.878589	0.00479978	-2.31878	2.31878	0.493652	-1.01844	0.00208602	-2.68068	2.68068	0.907616	-0.139846	0.0465174	-1.33238	1.33238
KAG1334072	A0A8B7BIU4	AT3G52990	MONOMER8I-2354	Pyruvate kinase 1, cytosolic	373.9	372.7	376.7	374.433	331.5	307.8	320.3	319.867	246.7	269.4	248.7	254.933	5.49656	9.68034	10.262	1.46797	3.02637	4.02537	0.854269	-0.227238	0.014145	-1.8494	1.8494	0.680851	-0.554589	0.00456672	-2.3404	2.3404	0.796999	-0.327351	0.0423382	-1.37327	1.37327
KAG1334357	A0A8B7C6L6	AT1G60420	#N/A	putative nucleoredoxin 1	384.8	366.3	375.4	375.5	240.8	233.4	211.8	228.667	225.2	256.2	237.9	239.767	9.56964	12.3032	12.7243	2.54851	5.38041	5.30697	0.608966	-0.715567	0.00371517	-2.43002	2.43002	0.638526	-0.647182	0.010943	-1.96086	1.96086	1.04854	0.068385	0.494131	-0.306158	0.306158
KAG1337780	A0A8B9ACS7	AT1G51740	#N/A	putative Syntaxin-81	370.4	395.1	374.9	380.133	295.4	269.3	258.5	274.4	206.2	247.2	223	225.467	7.86398	15.49	16.8288	2.06874	5.64504	7.46399	0.721852	-0.470225	0.021094	-1.67584	1.67584	0.593125	-0.753591	0.00100403	-2.99825	2.99825	0.821672	-0.283366	0.139678	-0.854871	0.854871
KAG1331211	A0A8B8J7B6	AT1G77120	MONOMER8I-2100	alcohol dehydrogenase 3	377.1	379.7	374.8	377.2	326.7	309.4	316.3	317.467	151.5	149.2	154.2	151.633	6.67025	7.11071	2.04342	1.76836	2.23983	1.3476	0.84164	-0.248725	0.00922623	-2.03498	2.03498	0.401997	-1.31474	0.000160491	-3.79455	3.79455	0.477635	-1.06602	0.000807526	-3.09284	3.09284
KAG1338421	A0A8B9A9L9	AT5G19440	MONOMER8I-911	cinnamoyl-CoA reductase 1-like	391.8	381.8	370.4	381.333	258.1	269.6	248.8	258.833	178.7	175	149.1	167.6	12.9811	8.50738	13.1684	3.40415	3.28682	7.85704	0.678759	-0.559029	0.00257053	-2.58998	2.58998	0.43951	-1.18603	0.000385512	-3.41396	3.41396	0.647521	-0.627001	0.00443649	-2.35296	2.35296
KAG1362598	A0A8B7BG27	AT3G10370	EGU0967G0009-MONOMER	glycerol-3-phosphate dehydrogenase SDP6, mitochondrial	364.1	356.7	356.4	359.067	73.9	70.8	48.5	64.4	18.8	16.4	13.3	16.1667	8.81697	11.314	2.25142	2.45552	17.5683	13.9263	0.179354	-2.47912	0.000521553	-3.2827	3.2827	0.0450241	-4.47316	1.78029e-05	-4.74951	4.74951	0.251035	-1.99404	0.0177855	-1.74993	1.74993
KAG1326242	A0A8B8ZRP9	AT3G05560	#N/A	60S ribosomal protein L22-2	376.7	372.4	352.7	367.267	180.9	191.8	161.7	178.133	75.4	73.4	78.9	75.9	9.89586	12.443	2.27303	2.69446	6.98523	2.99477	0.485025	-1.04387	0.00056211	-3.25018	3.25018	0.206662	-2.27466	0.00091268	-3.03968	3.03968	0.426085	-1.23079	0.0102019	-1.99132	1.99132
KAG1366840	A0A8B7C260	#N/A	#N/A	MFP1 attachment factor 1	367.1	356.1	351.1	358.1	226.8	232.1	254.3	237.733	241.8	238	247.9	242.567	9.79671	11.9126	4.07785	2.73575	5.01089	1.68113	0.663874	-0.591018	0.0109299	-1.96139	1.96139	0.677371	-0.561981	0.00315759	-2.50064	2.50064	1.02033	0.0290371	0.517286	-0.286269	0.286269
KAG1331902	#N/A	#N/A	MONOMER8I-268	Glucose-6-phosphate 1-epimerase	350.2	370.6	342.5	354.433	226.1	195	196.1	205.733	208.5	192.8	217.6	206.3	17.6689	14.4084	10.2434	4.98511	7.00344	4.96528	0.580457	-0.784739	0.00990629	-2.00409	2.00409	0.582056	-0.78077	0.0109174	-1.96188	1.96188	1.00275	0.00396826	0.964786	-0.0155692	0.0155692
KAG1366211	A0A8B7BY99	AT1G18100	#N/A	protein MOTHER of FT and TFL1	315.4	325.4	337.1	325.967	199.6	194.8	199.9	198.1	342.5	342.6	338	341.033	7.35179	2.33666	2.14528	2.25538	1.17954	0.629053	0.607731	-0.718496	0.00243945	-2.61271	2.61271	1.04622	0.0651883	0.18729	-0.727486	0.727486	1.72152	0.783684	0.000383584	-3.41614	3.41614
KAG1368612	A0A8B7BLE3	#N/A	#N/A	putative Eukaryotic translation initiation factor 5A-4	327.4	318.9	332	326.1	244.8	243.5	209.8	232.7	205.6	208.8	213	209.133	14.4963	16.2014	3.03022	4.44535	6.96237	1.44894	0.713585	-0.486843	0.0234164	-1.63048	1.63048	0.641317	-0.640891	0.00090812	-3.04186	3.04186	0.898725	-0.154048	0.221756	-0.654125	0.654125
KAG1338567	A0A8B8ZFI4	#N/A	EGU2789G0001-MONOMER	glucan endo-1,3-beta-glucosidase	354.3	306.5	330.9	330.567	425.7	522.2	470.3	472.733	3237.1	3199.3	3600.5	3345.63	15.7387	39.4335	180.877	4.76114	8.3416	5.40637	1.43007	0.516085	0.0762477	-1.11777	1.11777	10.1209	3.33927	0.00177787	-2.7501	2.7501	7.07721	2.82318	0.00218025	-2.66149	2.66149
KAG1327899	A0A8B7CA35	AT3G22110	#N/A	Proteasome subunit alpha type-4	330.8	309.9	326.5	322.4	257.4	314.5	266.9	279.6	383.3	347.4	366.4	365.7	7.66543	24.9809	14.6645	2.37762	8.93452	4.00997	0.867246	-0.205487	0.216879	-0.663783	0.663783	1.13431	0.181809	0.011346	-1.94516	1.94516	1.30794	0.387296	0.0896144	-1.04762	1.04762
KAG1365456	A0A8B7BWM8	AT1G74040	MONOMER8I-390	2-isopropylmalate synthase A	328.4	330.2	317.4	325.333	149.8	144.5	153.8	149.367	87	101.6	83.7	90.7667	9.47712	3.80905	7.77789	2.91305	2.55014	8.5691	0.459119	-1.12306	0.00136762	-2.86403	2.86403	0.278996	-1.84168	0.000251463	-3.59953	3.59953	0.607677	-0.718624	0.0187003	-1.72815	1.72815
KAG1365790	A0A8B7BHV3	AT5G59420	#N/A	putative Oxysterol-binding protein-related protein 3C	339.5	313.3	314.9	322.567	141.2	124.7	99.9	121.933	53.1	66.4	71.2	63.5667	16.7013	16.9738	7.65608	5.17764	13.9205	12.0442	0.37801	-1.4035	0.0014734	-2.83168	2.83168	0.197065	-2.34326	0.00279889	-2.55301	2.55301	0.521323	-0.93975	0.0765334	-1.11615	1.11615
KAG1368731	A0A8B7BVB6	AT3G12780	MONOMER8I-2984	phosphoglycerate kinase, chloroplastic	321.1	357.7	312.6	330.467	390.3	309.9	316.3	338.833	250.2	354.8	302	302.333	18.0384	36.4861	42.7034	5.45848	10.7682	14.1246	1.02532	0.0360711	0.827862	-0.082042	0.082042	0.914868	-0.128365	0.320827	-0.493729	0.493729	0.892277	-0.164436	0.572297	-0.242379	0.242379
KAG1359512	A0A8B7CRC6	AT5G17310	EGU0709G0399-MONOMER	putative UTP--glucose-1-phosphate uridylyltransferase	301.9	316	308.5	308.8	138.6	121.6	108.3	122.833	61.5	84.4	82.4	76.1	6.28793	12.4006	10.356	2.03625	10.0955	13.6084	0.397776	-1.32997	0.00377362	-2.42324	2.42324	0.246438	-2.0207	0.000320134	-3.49467	3.49467	0.619539	-0.690734	0.0949597	-1.02246	1.02246
KAG1341882	A0A8B7C2L8	AT4G39260	#N/A	glycine-rich RNA-binding protein GRP1A-like	304	319.6	307.5	310.367	239.7	259.3	234.5	244.5	189.1	155.2	157.4	167.233	9.39462	10.6783	15.4881	3.02694	4.36741	9.26139	0.787778	-0.344139	0.00322387	-2.49162	2.49162	0.538825	-0.892111	0.0103945	-1.9832	1.9832	0.683981	-0.547972	0.0377081	-1.42357	1.42357
KAG1354647	A0A8B8ZNB4	AT2G21270	#N/A	ubiquitin fusion degradation protein 1	303.4	287.5	306	298.967	217.8	182	174.5	191.433	115.4	99.8	102.1	105.767	10.4079	18.8938	6.87621	3.4813	9.86965	6.5013	0.640317	-0.643143	0.0149312	-1.82591	1.82591	0.353774	-1.4991	0.000766139	-3.11569	3.11569	0.552499	-0.855957	0.0104626	-1.98036	1.98036
KAG1354533	A0A8B7C4K5	AT5G09590	EGU0206G0150-MONOMER	putative Heat shock 70 kDa protein, mitochondrial	292.4	319.9	298.5	303.6	246.9	262.3	254.1	254.433	324.5	279	312.4	305.3	10.3658	6.29144	19.2418	3.41428	2.47273	6.30259	0.838054	-0.254884	0.00731588	-2.13573	2.13573	1.0056	0.0080558	0.945289	-0.0244356	0.0244356	1.19992	0.26294	0.105422	-0.97707	0.97707
KAG1331254	A0A8B7BNE9	AT1G79500	MONOMER8I-2093	putative cytochrome B5	303.5	289.1	292.2	294.933	374.5	306.9	302.4	327.933	253	279	276.7	269.567	12.2927	32.9788	11.752	4.16797	10.0566	4.35958	1.11189	0.153014	0.226601	-0.644738	0.644738	0.913992	-0.129747	0.183067	-0.737391	0.737391	0.822017	-0.28276	0.205758	-0.686642	0.686642
KAG1370010	A0A8B9B175	AT1G09830	MONOMER8I-684	putative Phosphoribosylamine--glycine ligase	272.6	266.5	284.8	274.633	186.8	184.8	165.4	179	185.8	170.6	153.6	170	8.92837	9.65125	13.1524	3.25102	5.39176	7.73673	0.651778	-0.617547	0.015238	-1.81707	1.81707	0.619007	-0.691972	0.0163377	-1.78681	1.78681	0.949721	-0.0744248	0.156925	-0.804308	0.804308
KAG1368092	A0A8B7C3X4	AT1G29850	#N/A	DNA-binding protein	289.9	268	283.5	280.467	271	290.8	265.8	275.867	356.3	328.2	337.1	340.533	10.0586	10.7707	11.7258	3.58638	3.90433	3.44338	0.983599	-0.0238582	0.769069	-0.114035	0.114035	1.21417	0.279967	0.00376405	-2.42434	2.42434	1.23441	0.303825	0.0451065	-1.34576	1.34576
KAG1368115	A0A8B7D1Y1	AT3G04880	EGU2441G0851-MONOMER	DNA damage-repair/toleration protein DRT102	265.7	262.5	279.6	269.267	219.6	223.2	239.5	227.433	174	170.4	184.3	176.233	6.62034	8.65807	5.89029	2.45866	3.80686	3.34233	0.84464	-0.243592	0.00262073	-2.58158	2.58158	0.654494	-0.611549	0.000149908	-3.82417	3.82417	0.774879	-0.367957	0.0031588	-2.50048	2.50048
KAG1331616	A0A8B7BGT4	AT5G13420	EGU2407G0044-MONOMER	transaldolase-like	279.3	275.7	276	277	243.5	240.4	234.5	239.467	213.8	244	225.7	227.833	10.8089	3.73304	12.421	3.90211	1.5589	5.45181	0.864501	-0.210061	0.00279529	-2.55357	2.55357	0.822503	-0.281907	0.037318	-1.42808	1.42808	0.95142	-0.071846	0.353867	-0.45116	0.45116
KAG1358718	A0A8B7C5N1	AT1G24360	EGU1685G1836-MONOMER	hypothetical protein COCNU_08G001640	263.5	248	274.6	262.033		78.5	60.4	69.45	18.8	22	20.6	20.4667	12.2677	9.05	1.30979	4.68172	13.031	6.39964	0.265043	-1.9157	0.0738317	-1.13176	1.13176	0.0781071	-3.6784	0.00115964	-2.93568	2.93568	0.294696	-1.7627	0.109313	-0.961328	0.961328
KAG1342017	A0A8B7BWZ6	#N/A	#N/A	MFP1 attachment factor 1	287.4	277.1	268.4	277.633	165.4	181	184.6	177	179.1	171.4	177.5	176	7.41702	8.33307	3.31763	2.67152	4.70795	1.88502	0.637532	-0.649431	0.0122849	-1.91063	1.91063	0.63393	-0.657605	0.00283076	-2.5481	2.5481	0.99435	-0.00817393	0.904691	-0.0434996	0.0434996
KAG1369957	A0A8B7BML0	AT1G34430	EGU1685G0776-MONOMER	Dihydrolipoamide acetyltransferase component of pyruvate dehydrogenase complex	284.6	278.5	267.6	276.9	124.4	99	102.3	108.567	23.5	27.6	18.5	23.2	10.7252	11.2766	3.72111	3.8733	10.3868	16.0393	0.392079	-1.35078	0.00117456	-2.93013	2.93013	0.0837848	-3.57717	0.000216822	-3.6639	3.6639	0.213694	-2.22638	0.00988706	-2.00493	2.00493
KAG1364462	A0A8B7C1G8	AT5G57330	MONOMER8I-269	Glucose-6-phosphate 1-epimerase	250.5	271	265.7	262.4	188.3	155.9	167.6	170.6	168.9	160.6	195.1	174.867	10.6598	13.3963	14.7029	4.06244	7.85244	8.40807	0.650152	-0.62115	0.0276584	-1.55817	1.55817	0.666413	-0.585512	0.0178853	-1.7475	1.7475	1.02501	0.0356377	0.782522	-0.106503	0.106503
KAG1364211	A0A8B7CSC3	AT2G44350	MONOMER8I-592	Citrate synthase, mitochondrial	272.2	286.4	265.4	274.667	203.8	191.5	185.7	193.667	174.2	169	181.2	174.8	9.54424	7.54645	4.99867	3.47484	3.89662	2.85965	0.705097	-0.504106	0.00886461	-2.05234	2.05234	0.636408	-0.651977	0.00916954	-2.03765	2.03765	0.902582	-0.14787	0.127472	-0.894587	0.894587
KAG1334586	A0A8B7CRG4	AT1G78300	#N/A	14-3-3-like protein	267.4	257.8	259.1	261.433	219.9	183.6	179.8	194.433	72.9	74.2	62.3	69.8	6.00074	18.0744	5.32979	2.29532	9.29591	7.6358	0.743721	-0.427168	0.0209804	-1.67819	1.67819	0.26699	-1.90514	0.000451027	-3.3458	3.3458	0.358992	-1.47798	0.00829897	-2.08098	2.08098
KAG1346747	A0A8B7D5R1	AT1G26480	#N/A	putative 14-3-3-like protein D	269.6	273.3	259	267.3	180.4	163.8	145.8	163.333	70.2	72.8	71.6	71.5333	15.7035	14.1292	1.06249	5.87485	8.65056	1.48531	0.611049	-0.710641	0.00510944	-2.29163	2.29163	0.267614	-1.90177	0.000458948	-3.33824	3.33824	0.437959	-1.19113	0.0125926	-1.89988	1.89988
KAG1346573	A0A8B7D379	#N/A	#N/A	early nodulin-like protein 1	240.8	229.1	247	238.967	461.5	467.2	464.6	464.433	686.1	763.5	678.6	709.4	7.03704	2.33	38.3768	2.94478	0.501686	5.40976	1.94351	0.958662	0.000799688	-3.09708	3.09708	2.96861	1.56979	0.00466012	-2.3316	2.3316	1.52745	0.611128	0.0109515	-1.96053	1.96053
KAG1338334	A0A8B7BZC1	AT5G12250	#N/A	Tubulin beta chain	252.1	240.7	241.1	244.633	90.2	91.1	72.1	84.4667	40	57.8	44	47.2667	5.77918	8.75227	7.6251	2.36238	10.3618	16.1321	0.345279	-1.53417	0.00124952	-2.90326	2.90326	0.193214	-2.37173	0.00181953	-2.74004	2.74004	0.55959	-0.837559	0.0306867	-1.51305	1.51305
KAG1331567	A0A8B7BHD2	AT5G16440	#N/A	putative isopentenyl-diphosphate Delta-isomerase I	253.3	240.6	239.6	244.5	112.9	125.6	116.5	118.333	125.2	126.4	132.2	127.933	10.5059	5.34436	3.0565	4.29691	4.51636	2.38914	0.483981	-1.04698	0.00350668	-2.4551	2.4551	0.523245	-0.934442	0.00271983	-2.56546	2.56546	1.08113	0.112536	0.166969	-0.777365	0.777365
KAG1339069	A0A8B7C6H1	AT5G58590	#N/A	ran-binding protein 1	218.4	231.4	237	228.933	168.9	164.9	156.6	163.467	102.1	104.8	91.3	99.4	10.1143	5.12272	5.83267	4.41801	3.1338	5.86787	0.714036	-0.485931	0.0181225	-1.74178	1.74178	0.434188	-1.20361	0.00439199	-2.35734	2.35734	0.608075	-0.717679	0.00100253	-2.9989	2.9989
KAG1326363	A0A8B7CMG2	AT1G03475	MONOMER8I-2164	coproporphyrinogen-III oxidase 1, chloroplastic	209.8	236.9	232.4	226.367	189.2	191	217.3	199.167	193.4	190.8	198.3	194.167	11.6847	12.8432	3.10948	5.16185	6.44849	1.60145	0.879841	-0.184685	0.103109	-0.986702	0.986702	0.857753	-0.221366	0.0648618	-1.18801	1.18801	0.974895	-0.0366807	0.554965	-0.255735	0.255735
KAG1358676	A0A8B7CQ66	AT3G03960	#N/A	putative T-complex protein 1 subunit theta	215.8	243.1	231.6	230.167	160.5	157.8	170.7	163	126.8	122.4	129.5	126.233	8.79326	5.55518	2.92613	3.82039	3.40808	2.31803	0.708182	-0.497807	0.0182868	-1.73786	1.73786	0.548443	-0.866586	0.00773925	-2.1113	2.1113	0.774438	-0.368779	0.00379139	-2.4212	2.4212
KAG1366376	#N/A	#N/A	#N/A	putative Proteasome subunit alpha type-6	239.4	227	230.8	232.4	179	164.7	164.8	169.5	192.2	175.2	181.9	183.1	10.3762	6.71764	6.9919	4.46481	3.96321	3.81862	0.729346	-0.455325	0.00068258	-3.16585	3.16585	0.787866	-0.343978	0.000741138	-3.1301	3.1301	1.08024	0.111347	0.0192704	-1.71511	1.71511
KAG1335189	A0A8B7BRH0	AT1G65930	MONOMER8I-2052	putative Isocitrate dehydrogenase [NADP], chloroplastic	210.4	212.2	229.9	217.5	262	230.9	240.4	244.433	302.8	295	276.3	291.367	8.10173	13.0129	11.1195	3.72493	5.3237	3.81631	1.12383	0.168426	0.165167	-0.782076	0.782076	1.33962	0.42182	0.0341423	-1.46671	1.46671	1.19201	0.253395	0.03268	-1.48572	1.48572
KAG1338052	A0A8B7CRN7	AT2G30110	MONOMER8I-448	ubiquitin-activating enzyme E1 1	214.1	215.1	229.8	219.667	129.5	113.5	114.9	119.3	45.7	46.6	41.5	44.6	13.5351	7.2351	2.22261	6.16165	6.06463	4.98343	0.543096	-0.880722	0.00754641	-2.12226	2.12226	0.203035	-2.3002	0.00142545	-2.84605	2.84605	0.373847	-1.41948	0.00431297	-2.36522	2.36522
KAG1369845	A0A8B7BMD6	AT5G10160	EGU1685G1909-MONOMER	3-hydroxyacyl-[acyl-carrier-protein] dehydratase FabZ-like	254.8	232.6	226.8	238.067	565.3	477.7	476.2	506.4	1036.4	1085.5	1091.5	1071.13	12.1052	41.6531	24.682	5.08477	8.22533	2.30429	2.12714	1.08891	0.00613789	-2.21198	2.21198	4.4993	2.1697	0.000969493	-3.01346	3.01346	2.11519	1.08079	0.00681685	-2.16642	2.16642
KAG1326959	A0A8B7BNC7	AT1G74030	EGU1976G0003-MONOMER	enolase 1, chloroplastic	218.3	220.2	226.2	221.567	86.7	86.9	79	84.2	63.3	54	43.8	53.7	12.5363	3.67786	7.96367	5.65801	4.36801	14.8299	0.380021	-1.39585	0.00129134	-2.88896	2.88896	0.242365	-2.04475	0.00223731	-2.65027	2.65027	0.637767	-0.648898	0.0137332	-1.86223	1.86223
KAG1365125	A0A8B8ZNI2	AT3G22200	EGU0159G0163-MONOMER	gamma-aminobutyrate transaminase 1, mitochondrial	248.7	248	224.7	240.467	95.3	99.2	78.8	91.1	142.1	143.8	141.8	142.567	13.7502	8.84195	0.880656	5.71813	9.70576	0.617715	0.378847	-1.40031	0.000213634	-3.67033	3.67033	0.592875	-0.7542	0.00586695	-2.23159	2.23159	1.56495	0.646114	0.0124695	-1.90415	1.90415
KAG1354068	A0A8B7BMW4	AT4G36130	#N/A	60S ribosomal protein L8	239.3	213.5	219.7	224.167	85.6	103	88.5	92.3667	24.5	34	16.4	24.9667	12.9212	7.61154	7.19274	5.76412	8.24057	28.8094	0.412045	-1.27913	0.00883931	-2.05358	2.05358	0.111375	-3.1665	0.00271175	-2.56675	2.56675	0.2703	-1.88737	0.00235221	-2.62852	2.62852
KAG1337891	A0A8B7CN66	AT3G12580	#N/A	Heat shock 70 kDa 4-like protein	197.6	229.2	219	215.267	234.6	218.1	243.7	232.133	253.6	254.8	269.2	259.2	18.4684	10.5957	7.08802	8.57931	4.56449	2.73457	1.07835	0.108829	0.362849	-0.440274	0.440274	1.20409	0.267941	0.0421623	-1.37508	1.37508	1.1166	0.159112	0.0345926	-1.46102	1.46102
KAG1328294	A0A8B7BYV7	AT1G56450	#N/A	proteasome subunit beta type-4	234.6	258	216.9	236.5	306.3	306.4	340.2	317.633	391.9	367.6	396.1	385.2	20.9161	15.9571	12.5626	8.84403	5.02375	3.26133	1.34306	0.425522	0.0670084	-1.17387	1.17387	1.62875	0.703768	0.0185627	-1.73136	1.73136	1.21272	0.278245	0.0178326	-1.74878	1.74878
KAG1368669	A0A8B7BV42	AT3G02230	MONOMER8I-1986	UDP-arabinopyranose mutase 1	204.1	195.6	209.5	203.067	255.2	293.1	269.6	272.633	257.5	256.8	251.6	255.3	7.18022	15.6206	2.63186	3.53589	5.72952	1.03089	1.34258	0.425009	0.0392624	-1.40602	1.40602	1.25722	0.33024	0.0110805	-1.95544	1.95544	0.936423	-0.0947684	0.260227	-0.584648	0.584648
KAG1326076	A0A8B7CWK4	#N/A	#N/A	putative neurofilament medium polypeptide	189	193.9	205.1	196	261.6	255.1	261.8	259.5	135.8	121.2	110.9	122.633	12.6998	3.11234	10.2158	6.47949	1.19936	8.33035	1.32398	0.404881	0.00550691	-2.25909	2.25909	0.62568	-0.676502	0.0250702	-1.60084	1.60084	0.472575	-1.08138	0.00290739	-2.5365	2.5365
KAG1354513	A0A8B8ZV19	AT4G36195	#N/A	putative serine protease EDA2	218.1	225.6	205	216.233	328.6	345.5	330.2	334.767	355.1	376.2	364.3	365.2	10.253	7.61767	8.63752	4.74162	2.27552	2.36515	1.54817	0.630567	0.00131231	-2.88197	2.88197	1.68892	0.756098	0.00189213	-2.72305	2.72305	1.09091	0.125531	0.00517566	-2.28603	2.28603
KAG1362494	A0A8B7D4X7	AT3G23990	#N/A	chaperonin CPN60-2, mitochondrial	193.8	212.7	204.8	203.767	169.7	151	160.1	160.267	144.2	147.6	154	148.6	6.07252	7.63515	4.06284	2.98014	4.76403	2.73408	0.786521	-0.346444	0.0571501	-1.24298	1.24298	0.729265	-0.455484	0.00804669	-2.09438	2.09438	0.927205	-0.10904	0.235702	-0.627636	0.627636
KAG1359173	A0A8B7BHX8	AT5G24400	EGU0531G0690-MONOMER	putative 6-phosphogluconolactonase 4, chloroplastic	207.7	207.9	200.3	205.3	132.4	150.3	127.5	136.733	163.4	141	150.5	151.633	7.64208	9.79943	9.17981	3.7224	7.16682	6.05395	0.666017	-0.586369	0.0064433	-2.19089	2.19089	0.738594	-0.437147	0.0156986	-1.80414	1.80414	1.10897	0.149222	0.350018	-0.45591	0.45591
KAG1361131	A0A8B7CR54	AT3G02720	MONOMER8I-1888	protein DJ-1	187.5	192.1	195	191.533	176.5	158.9	158.6	164.667	143.8	171.2	138.3	151.1	5.24831	8.36833	14.3891	2.74015	5.08198	9.52291	0.859729	-0.218047	0.0781555	-1.10704	1.10704	0.788897	-0.342092	0.0609072	-1.21533	1.21533	0.917611	-0.124045	0.418453	-0.378353	0.378353
KAG1333968	A0A8B7CEB8	AT4G14880	MONOMER8I-2876	cysteine synthase	181	183.2	193.5	185.9	84	85.3	72.4	80.5667	50.8	50.2	52.5	51.1667	6.38342	5.79904	0.974109	3.43379	7.19782	1.9038	0.433387	-1.20627	0.00556065	-2.25487	2.25487	0.275238	-1.86125	0.000576325	-3.23933	3.23933	0.635085	-0.654979	0.0254459	-1.59438	1.59438
KAG1364280	A0A8B7BPX5	AT4G26470	#N/A	putative calcium-binding protein CML21	176	192.4	189.8	186.067	97.4	112.5	94.6	101.5	63.5	57	74.1	64.8667	6.54616	7.86172	7.04762	3.51818	7.74554	10.8648	0.545503	-0.87434	0.00394876	-2.40354	2.40354	0.348621	-1.52027	0.00347165	-2.45946	2.45946	0.63908	-0.645931	0.0694834	-1.15812	1.15812
KAG1330550	A0A8B7BEP7	AT3G02540	#N/A	ubiquitin receptor RAD23d	179.4	177.1	188.5	181.667	184.3	208.1	182.2	191.533	171.5	193.4	167.1	177.333	5.70019	11.7457	11.502	3.13772	6.13247	6.48608	1.05431	0.0763018	0.466133	-0.33149	0.33149	0.976147	-0.03483	0.732296	-0.135313	0.135313	0.925861	-0.111132	0.00248689	-2.60434	2.60434
KAG1327951	A0A8B7BUT4	AT5G09810	#N/A	Actin-101	191.5	192	186.1	189.867	98.2	109.8	76.8	94.9333	23.7	7.2	18.7	16.5333	3.58209	13.6688	6.90813	1.88664	14.3983	41.783	0.5	-1	0.0067949	-2.16782	2.16782	0.0870787	-3.52154	0.00109273	-2.96149	2.96149	0.174157	-2.52154	0.0263841	-1.57866	1.57866
KAG1358666	A0A8B7CVR7	AT5G17920	EGU2441G1163-MONOMER	5-methyltetrahydropteroyltriglutamate--homocysteine methyltransferase 2	187.2	195.6	185.9	189.567	80	74.6	54.5	69.7	45.9	58.8	47.1	50.6	13.596	10.9718	5.81893	7.17215	15.7414	11.4999	0.367681	-1.44347	0.00340158	-2.46832	2.46832	0.266925	-1.9055	8.77302e-05	-4.05685	4.05685	0.725968	-0.462021	0.13633	-0.865409	0.865409
KAG1338919	A0A8B9A1D6	AT3G08650	MONOMER8I-346	putative zinc transporter	178	152.3	182.9	171.067	76.2	90.4	74.3	80.3	183.6	181.4	182.1	182.367	11.1451	7.18378	0.917727	6.51506	8.94617	0.503232	0.469408	-1.09109	0.0247997	-1.60555	1.60555	1.06606	0.0922834	0.339776	-0.468808	0.468808	2.27107	1.18337	0.00292742	-2.53352	2.53352
KAG1331684	A0A8B8ZLJ8	AT2G26060	#N/A	protein CIA1	161	170	181.2	170.733	136.4	134.7	158	143.033	159.7	158.8	156.9	158.467	9.74132	10.6058	1.16714	5.70558	7.41489	0.736523	0.837759	-0.255393	0.0185057	-1.73269	1.73269	0.928153	-0.107565	0.206878	-0.684285	0.684285	1.1079	0.147828	0.202994	-0.692516	0.692516
KAG1361520	A0A8B7CS47	#N/A	#N/A	cocosin 1	170.9	191.9	178	180.267	58.3	66.4	51.2	58.6333	67.4	63.2	66.4	65.6667	8.30691	6.20985	1.79134	4.60812	10.591	2.72792	0.325259	-1.62034	0.00138553	-2.85838	2.85838	0.364275	-1.4569	0.00417453	-2.37939	2.37939	1.11995	0.16344	0.323311	-0.490379	0.490379
KAG1330142	A0A8B7CG88	AT5G56600	#N/A	profilin	170.9	166	172.8	169.9	189.4	202.7	206.9	199.667	162.5	157.8	180.8	167.033	10.2225	7.45937	9.92181	6.01676	3.73591	5.94002	1.1752	0.232908	0.034572	-1.46128	1.46128	0.983127	-0.0245498	0.650476	-0.186769	0.186769	0.836561	-0.257457	0.0336013	-1.47364	1.47364
KAG1362738	A0A8B8ZVC5	AT2G18110	#N/A	putative Elongation factor 1-delta	195.5	184.7	169.9	183.367	104	83.7	77.7	88.4667	66.8	59.8	55.6	60.7333	12.3973	11.2535	4.61976	6.76092	12.7207	7.60664	0.482458	-1.05153	0.00103584	-2.98471	2.98471	0.331213	-1.59417	0.00123214	-2.90934	2.90934	0.686511	-0.542645	0.0282376	-1.54917	1.54917
KAG1363281	A0A8B7CCD9	AT2G17420	EGU2441G0148-MONOMER	thioredoxin reductase NTRB	175.4	156.8	167.9	166.7	113.9	107.6	109.9	110.467	111.9	112.4	113.3	112.533	9.38393	2.60299	0.579272	5.62923	2.35636	0.514756	0.662667	-0.593643	0.00420701	-2.37603	2.37603	0.675065	-0.566902	0.0102187	-1.99061	1.99061	1.01871	0.0267413	0.423848	-0.37279	0.37279
KAG1366332	A0A8B9B246	AT3G53750	#N/A	putative Actin	181.2	154.7	166.7	167.533	103.6	128.4	87.6	106.533	44.7	32.2	27.2	34.7	7.94888	16.7852	7.3598	4.74466	15.7558	21.2098	0.635893	-0.653143	0.0722817	-1.14097	1.14097	0.207123	-2.27144	0.00155177	-2.80917	2.80917	0.32572	-1.6183	0.0276149	-1.55886	1.55886
KAG1368445	A0A8B7BXE4	AT5G62700	#N/A	Tubulin beta-5 chain	169.7	171	164.2	168.3	55.1	48	36.4	46.5	14.1	14.2	15.6	14.6333	6.21577	7.70757	0.684755	3.69327	16.5754	4.67942	0.276292	-1.85573	0.00100151	-2.99934	2.99934	0.0869479	-3.5237	0.000276752	-3.55791	3.55791	0.314695	-1.66797	0.0327255	-1.48511	1.48511
KAG1334769	A0A8B7CFC4	#N/A	MONOMER8I-2439	mannose-6-phosphate isomerase 2	156.2	175.1	162.5	164.6	84	70.8	65.7	73.5	32.7	51.6	41.1	41.8	10.065	7.71103	7.73175	6.1148	10.4912	18.497	0.446537	-1.16315	0.0111363	-1.95326	1.95326	0.253949	-1.97739	3.24921e-05	-4.48822	4.48822	0.568707	-0.814241	0.0855968	-1.06754	1.06754
KAG1347005	A0A8B7C3Y4	#N/A	#N/A	Protein ASPARTIC PROTEASE IN GUARD CELL 1	142.7	150.3	158.2	150.4	58.9	55.7	46.8	53.8	64.5	62.8	67.5	64.9333	11.7596	5.11924	1.94308	7.81891	9.51532	2.99242	0.357713	-1.48313	0.00683908	-2.165	2.165	0.431738	-1.21177	0.00191853	-2.71703	2.71703	1.20694	0.271353	0.14633	-0.834667	0.834667
KAG1328219	A0A8B7BYY5	AT2G44100	#N/A	guanosine nucleotide diphosphate dissociation inhibitor 1	175	174.3	158	169.1	94.4	99.2	81.8	91.8	144.4	152.4	158	151.6	8.33915	7.33757	5.58092	4.93149	7.993	3.68135	0.542874	-0.881311	0.000472167	-3.3259	3.3259	0.896511	-0.157607	0.194489	-0.711106	0.711106	1.65142	0.723704	0.0185144	-1.73249	1.73249
KAG1359481	A0A8B7D4F3	#N/A	#N/A	hypothetical protein COCNU_08G009270	156.8	173.4	158	162.733	40.9	42	25.8	36.2333	9.4	12.4	7.5	9.76667	6.75584	7.39114	2.01715	4.15148	20.3987	20.6534	0.222655	-2.16712	0.00175408	-2.75595	2.75595	0.0600164	-4.0585	0.000722947	-3.14089	3.14089	0.269549	-1.89138	0.0233857	-1.63105	1.63105
KAG1366287	A0A8B7CC30	AT4G39230	MONOMER8I-330	isoflavone reductase-like protein	167.8	157.5	155	160.1	149.8	151.2	154	151.667	194.4	205.6	198.7	199.567	9.4454	1.74611	4.61327	5.89969	1.15128	2.31164	0.947325	-0.0780693	0.235112	-0.628726	0.628726	1.24651	0.317897	0.0265139	-1.57653	1.57653	1.31582	0.395967	0.00457239	-2.33986	2.33986
KAG1359074	A0A8B7BHW4	#N/A	EGU0709G0753-MONOMER	NDR1/HIN1-like protein 12	148.2	136.6	153.1	145.967	305.6	282.2	272.4	286.733	145.6	139.2	134.3	139.7	8.64439	13.9278	4.62673	5.92217	4.85739	3.31191	1.96438	0.974071	0.00633872	-2.198	2.198	0.957068	-0.0633069	0.433385	-0.363126	0.363126	0.487212	-1.03738	0.00203066	-2.69236	2.69236
KAG1326977	A0A8B7BN85	AT3G48000	EGU1685G1740-MONOMER	aldehyde dehydrogenase family 2 member B7, mitochondrial	156.8	165.1	153	158.3	84	83	91.1	86.0333	717.2	697.7	773.5	729.467	7.93587	3.60586	32.1379	5.01318	4.19124	4.40567	0.543483	-0.879694	0.00646141	-2.18967	2.18967	4.60813	2.20418	0.00205613	-2.68695	2.68695	8.47888	3.08387	0.000984329	-3.00686	3.00686
KAG1326211	A0A8B7BI14	AT3G55010	EGU1685G0536-MONOMER	phosphoribosylformylglycinamidine cyclo-ligase, chloroplastic/mitochondrial	141.5	143.6	150.7	145.267	209.3	206	239.8	218.367	150.3	162.4	183.1	165.267	6.78863	15.2154	13.5431	4.67322	6.96783	8.1947	1.50321	0.588049	0.0122046	-1.91348	1.91348	1.13768	0.186092	0.0997443	-1.00111	1.00111	0.756831	-0.401957	0.00805984	-2.09367	2.09367
KAG1334920	A0A8B9AGL9	AT4G19880	EGU0935G1737-MONOMER	putative glutathionyl-hydroquinone reductase YqjG-like	141.1	130.5	150.4	140.667	159.7	182	192.6	178.1	297.9	310.4	322.8	310.367	7.7811	13.7116	10.1654	5.53159	7.69879	3.27529	1.26611	0.340407	0.0621177	-1.20678	1.20678	2.2064	1.14169	0.00160353	-2.79492	2.79492	1.74265	0.801286	0.00051811	-3.28558	3.28558
KAG1355091	A0A8B7C9J1	#N/A	#N/A	putative low-temperature-induced 65 kDa protein	131.9	136.6	149.3	139.267	204.1	232.5	230.9	222.5	347.2	382.8	350	360	8.09391	13.0272	16.1625	5.81181	5.8549	4.48959	1.59765	0.675955	0.00678311	-2.16857	2.16857	2.58497	1.37015	0.00367198	-2.4351	2.4351	1.61798	0.694192	0.00467237	-2.33046	2.33046
KAG1338596	A0A8B7D2X8	AT1G08830	MONOMER8I-2986	superoxide dismutase [Cu-Zn]	153.4	135.8	148.5	145.9	130.1	163.6	148.4	147.367	264.7	252	242.5	253.067	7.10549	13.6958	9.09444	4.87011	9.2937	3.59369	1.01005	0.0144304	0.929966	-0.0315328	0.0315328	1.73452	0.794538	0.00392473	-2.40619	2.40619	1.71726	0.780107	0.0184101	-1.73494	1.73494
KAG1327973	A0A8B7BUR8	AT1G43170	#N/A	hypothetical protein COCNU_01G019070	133.4	146.4	147	142.267	65.2	49.8	60.7	58.5667	18.6	28.8	24.1	23.8333	5.90153	6.46546	4.1684	4.14822	11.0395	17.4898	0.411668	-1.28045	0.00969258	-2.01356	2.01356	0.167526	-2.57755	0.000401934	-3.39585	3.39585	0.406944	-1.2971	0.0430439	-1.36609	1.36609
KAG1366587	A0A8B7D112	AT4G24620	EGU2755G0224-MONOMER	putative Glucose-6-phosphate isomerase 1, chloroplastic	146.8	153.1	145.8	148.567	121.2	118.6	109.6	116.467	118.8	140.4	105	121.4	3.7783	4.97013	14.5685	2.54317	4.26743	12.0004	0.783935	-0.351193	0.0103224	-1.98622	1.98622	0.817142	-0.291342	0.0789514	-1.10264	1.10264	1.04236	0.0598513	0.618688	-0.208528	0.208528
KAG1359282	A0A8B7CLM5	AT1G63940	MONOMER8I-2807	hypothetical protein COCNU_08G007280	141.7	150.7	144.7	145.7	74.7	82.5	78.8	78.6667	68.8	59.6	61	63.1333	4.21759	3.18573	4.0475	2.89471	4.04966	6.41103	0.539922	-0.889177	9.81527e-05	-4.0081	4.0081	0.43331	-1.20653	0.00407115	-2.39028	2.39028	0.802542	-0.317351	0.0910116	-1.0409	1.0409
KAG1347593	A0A8B7D570	AT5G19780	#N/A	tubulin alpha-3 chain	143.6	136.7	141.3	140.533	52.5	49.8	40.4	47.5667	11.8	11.2	12.2	11.7333	6.05741	5.18609	0.410961	4.3103	10.9028	3.50251	0.338472	-1.56289	0.00198469	-2.70231	2.70231	0.0834915	-3.58223	0.00020067	-3.69752	3.69752	0.246671	-2.01934	0.0114319	-1.94188	1.94188
KAG1366243	A0A8B7D3D7	AT5G40370	MONOMER8I-1466	glutaredoxin	149.9	153.3	137.8	147	203.3	168.5	200.3	190.7	154.4	146.2	155.9	152.167	6.27572	15.7455	4.26328	4.2692	8.25667	2.80172	1.29728	0.375489	0.0946027	-1.0241	1.0241	1.03515	0.0498362	0.551583	-0.258389	0.258389	0.797937	-0.325652	0.0426178	-1.37041	1.37041
KAG1362825	A0A8B8J7P3	AT2G29960	#N/A	Peptidyl-prolyl cis-trans isomerase	138.4	145.8	137.5	140.567	95	97.2	88.2	93.4667	89.6	106.2	91.5	95.7667	6.71476	3.83087	7.41815	4.77692	4.09865	7.74606	0.664928	-0.588731	0.00155753	-2.80756	2.80756	0.68129	-0.553659	0.00367333	-2.43494	2.43494	1.02461	0.0350716	0.637919	-0.195235	0.195235
KAG1368069	A0A8B9ALN5	#N/A	#N/A	zinc finger CCCH domain-containing protein 9	141.6	124	136	133.867	279	250	274	267.667	249.9	251.6	281.7	261.067	7.77255	12.6579	14.6065	5.80619	4.72898	5.59492	1.9995	0.999641	0.000850195	-3.07048	3.07048	1.9502	0.963621	0.00712972	-2.14693	2.14693	0.975342	-0.0360192	0.620769	-0.20707	0.20707
KAG1342695	A0A8B9A5T7	AT1G48430	MONOMER8I-21	hypothetical protein COCNU_05G009240	118.6	129.9	135.6	128.033	122.5	137.9	137.9	132.767	141.1	118.6	122.5	127.4	6.38325	7.25963	9.81733	4.98561	5.46796	7.70591	1.03697	0.0523735	0.108135	-0.966036	0.966036	0.995053	-0.00715419	0.96135	-0.0171184	0.0171184	0.959578	-0.0595277	0.699306	-0.155333	0.155333
KAG1337959	A0A8B7BRC9	AT5G13520	MONOMER8I-1553	leucine aminopeptidase	127.2	137.6	134.4	133.067	109.4	128.6	116.5	118.167	123.1	121.8	116.3	120.4	5.29069	7.92647	2.94732	3.97597	6.70787	2.44794	0.888026	-0.171326	0.0370382	-1.43135	1.43135	0.90481	-0.144314	0.0998647	-1.00059	1.00059	1.0189	0.0270123	0.747109	-0.126616	0.126616
KAG1365739	A0A8B7BGS4	AT5G59840	#N/A	ras-related protein RABE1c	137.9	123.5	133.1	131.5	90.4	115.6	93.3	99.7667	80.9	68.2	69.3	72.8	9.36156	11.2583	5.74514	7.11906	11.2846	7.89168	0.758682	-0.398433	0.12018	-0.920167	0.920167	0.553612	-0.853052	0.00195131	-2.70967	2.70967	0.729703	-0.454619	0.1346	-0.870955	0.870955
KAG1337863	A0A8B7BUI5	AT2G37660	#N/A	Sanguinarine reductase	109	126.7	132.8	122.833	181.1	165.2	186.4	177.567	168.9	161	156.7	162.2	9.10128	9.00827	5.05239	7.40946	5.07318	3.11492	1.44559	0.531659	0.0300965	-1.52148	1.52148	1.32049	0.401072	0.0665455	-1.17688	1.17688	0.91346	-0.130587	0.178057	-0.74944	0.74944
KAG1330078	A0A8B8J3A7	AT1G79990	#N/A	putative Coatomer subunit beta'-1	125.1	138.4	129.4	130.967	216.4	231.8	200.5	216.233	236.3	228	283.2	249.167	4.35447	12.7787	24.3026	3.32487	5.90969	9.75355	1.65106	0.723389	0.00687997	-2.16241	2.16241	1.90252	0.927911	0.024528	-1.61034	1.61034	1.1523	0.204522	0.330061	-0.481405	0.481405
KAG1334542	A0A8B7CZV9	#N/A	EGU0935G2031-MONOMER	putative oxidoreductase	125.8	128.4	128.8	127.667	83.2	90.9	92.9	89	116.4	100.6	98.8	105.267	9.2747	4.18171	7.90668	7.26478	4.69855	7.51109	0.697128	-0.520505	0.00271851	-2.56567	2.56567	0.824543	-0.278333	0.0755056	-1.12202	1.12202	1.18277	0.242171	0.197019	-0.705493	0.705493
KAG1368086	A0A8B7CKA0	AT5G08680	EGU2441G2609-MONOMER	ATP synthase subunit beta, mitochondrial	119.1	102.7	127.8	116.533	62.4	63.1	53.4	59.6333	57.4	50.8	51.5	53.2333	8.72047	4.41689	2.96011	7.48324	7.40674	5.56062	0.511728	-0.966552	0.0297883	-1.52595	1.52595	0.456808	-1.13034	0.0123106	-1.90972	1.90972	0.892677	-0.163789	0.173534	-0.760616	0.760616
KAG1346558	A0A8B7BIX2	AT5G45690	#N/A	oil body-associated protein 2B	125.3	125.8	126.5	125.867	138	171.7	168.8	159.5	305.3	289.4	281.1	291.933	0.579272	15.2488	10.0407	0.460226	9.56039	3.43938	1.26721	0.34166	0.0854506	-1.06828	1.06828	2.31939	1.21374	0.00199864	-2.69927	2.69927	1.8303	0.872083	0.0170225	-1.76898	1.76898
KAG1347868	A0A8B8ZER7	AT3G11830	#N/A	T-complex protein 1 subunit eta	126.6	127	125.8	126.467	76.5	60.6	59.1	65.4	31.4	41.4	21	31.2667	7.52677	7.87274	8.3288	5.95158	12.0378	26.6379	0.517132	-0.951395	0.00796845	-2.09863	2.09863	0.247232	-2.01606	0.00337245	-2.47205	2.47205	0.478084	-1.06467	0.0477109	-1.32138	1.32138
KAG1363274	A0A8B7CCI4	AT1G76550	MONOMER8I-2735	putative Pyrophosphate--fructose 6-phosphate 1-phosphotransferase subunit alpha	110.3	110.2	125.3	115.267	60.2	66.6	63.1	63.3	63.9	64.2	66	64.7	10.3829	2.61661	0.927362	9.00776	4.13367	1.43333	0.549161	-0.864698	0.0108201	-1.96577	1.96577	0.561307	-0.833138	0.00737984	-2.13195	2.13195	1.02212	0.0315602	0.540592	-0.26713	0.26713
KAG1331528	A0A8B7CPP6	AT4G13930	EGU2490G0001-MONOMER	serine hydroxymethyltransferase 4	132.7	137.9	124.2	131.6	92.1	89.5	88.9	90.1667	89	95	84.5	89.5	7.76475	1.38884	4.30116	5.90027	1.54031	4.80577	0.685157	-0.545493	0.00832629	-2.07955	2.07955	0.680091	-0.5562	0.000841481	-3.07496	3.07496	0.992606	-0.0107065	0.84995	-0.0706065	0.0706065
KAG1346440	A0A8B8ZF17	AT1G53240	MONOMER8I-771	malate dehydrogenase, mitochondrial	114	132.1	124	123.367	98.2	89	96	94.4	106.2	119.4	110.4	112	5.3528	3.92258	5.50636	4.33894	4.15528	4.91639	0.765199	-0.386094	0.0669255	-1.17441	1.17441	0.907863	-0.139454	0.0242276	-1.61569	1.61569	1.18644	0.24664	0.118353	-0.926822	0.926822
KAG1331841	A0A8B7CGV8	AT1G30580	MONOMER8I-904	putative Obg-like ATPase 1	121.2	121.2	124	122.133	102.2	83	96.4	93.8667	70.2	60.6	73.5	68.1	2.17077	8.04045	5.47175	1.77737	8.56582	8.03487	0.768559	-0.379772	0.036488	-1.43785	1.43785	0.557587	-0.84273	0.00367911	-2.43426	2.43426	0.725497	-0.462958	0.0143473	-1.84323	1.84323
KAG1326208	A0A8B7C259	AT2G30050	#N/A	protein transport protein SEC13	122.6	127.5	122.3	124.133	84.3	78.1	97.7	86.7	60.6	55.2	58.5	58.1	5.61528	8.17965	2.22261	4.52359	9.43443	3.82549	0.698443	-0.517787	0.0348055	-1.45835	1.45835	0.468045	-1.09528	0.0023055	-2.63723	2.63723	0.670127	-0.577494	0.0327271	-1.48509	1.48509
KAG1348205	A0A8B8ZF31	AT2G34590	MONOMER8I-2784	pyruvate dehydrogenase E1 component subunit beta	111.4	128.8	121.3	120.5	66.9	57.6	56	60.1667	61.7	71.8	52.3	61.9333	6.27466	4.80578	7.96255	5.20719	7.98745	12.8566	0.499308	-1.002	0.0175418	-1.75593	1.75593	0.51397	-0.960245	0.00910274	-2.04083	2.04083	1.02936	0.0417517	0.803449	-0.0950418	0.0950418
KAG1326316	A0A8B8ZAG1	AT1G08830	MONOMER8I-2986	putative Superoxide dismutase	129.7	117.8	121.1	122.867	120.7	141.4	124.2	128.767	142.5	151.2	154.2	149.3	6.28422	9.04667	4.96185	5.11466	7.02563	3.32341	1.04802	0.0676656	0.598423	-0.222992	0.222992	1.21514	0.281121	0.0605367	-1.21798	1.21798	1.15946	0.213455	0.0728021	-1.13786	1.13786
KAG1363891	A0A8B9A571	AT2G05990	EGU0881G1273-MONOMER	Enoyl-[acyl-carrier-protein] reductase [NADH] 1, chloroplastic	109	114.8	119.1	114.3	32.4	46.3	29.5	36.0667	18.6	24.2	30.3	24.3667	4.71346	7.33227	4.77796	4.12376	20.3298	19.6086	0.315544	-1.66409	0.00611421	-2.21366	2.21366	0.213182	-2.22984	4.01119e-05	-4.39673	4.39673	0.675601	-0.565757	0.222581	-0.652511	0.652511
KAG1337752	A0A8B7BU58	AT3G47000	MONOMER8I-1591	Lysosomal beta glucosidase	107.6	119.4	117.7	114.9	203.8	233.9	248.8	228.833	269.3	258.4	256.6	261.433	7.54247	18.7173	5.6109	6.56438	8.17943	2.14621	1.99159	0.993918	0.00773481	-2.11155	2.11155	2.27531	1.18606	0.00266755	-2.57389	2.57389	1.14246	0.192146	0.197552	-0.704318	0.704318
KAG1338829	A0A8B7BLR2	AT4G18440	EGU2621G0325-MONOMER	Adenylosuccinate lyase	131.4	126.6	117.1	125.033	143.4	138.8	151.5	144.567	139.5	162.6	154.4	152.167	6.57286	5.24997	9.56185	5.25689	3.63152	6.2838	1.15623	0.209422	0.119429	-0.92289	0.92289	1.21701	0.28334	0.104288	-0.981767	0.981767	1.05257	0.0739174	0.458091	-0.339048	0.339048
KAG1363428	A0A8B7C6Q8	#N/A	#N/A	cysteine proteinase inhibitor 4	116.4	128.5	114.7	119.867	139.2	136.1	155.9	143.733	151.1	151.8	162.8	155.233	7.12821	8.69572	5.35807	5.94678	6.0499	3.45162	1.19911	0.261964	0.133322	-0.875099	0.875099	1.29505	0.373008	0.0386972	-1.41232	1.41232	1.08001	0.111044	0.0457554	-1.33956	1.33956
KAG1338031	A0A8B7CRW8	AT5G58590	#N/A	ran-binding protein 1	104	114.4	114.5	110.967	60	54.1	52.9	55.6667	47.6	31.2	30.1	36.3	7.9418	3.10305	8.00292	7.15693	5.57433	22.0466	0.501652	-0.995241	0.0103227	-1.98621	1.98621	0.327125	-1.61208	0.0146555	-1.834	1.834	0.652096	-0.616844	0.0308628	-1.51057	1.51057
KAG1346405	A0A8B7CEX7	AT1G51710	#N/A	putative Ubiquitin carboxyl-terminal hydrolase 6	127.2	126.1	113.8	122.367	113.1	113.5	106.6	111.067	112.9	97	89.1	99.6667	11.3569	3.16263	9.89759	9.28104	2.84751	9.93069	0.907655	-0.139785	0.032703	-1.48541	1.48541	0.814492	-0.296028	0.0353924	-1.45109	1.45109	0.897359	-0.156243	0.179084	-0.746944	0.746944
KAG1338034	A0A8B7CRY7	AT5G01320	EGU2621G1057-MONOMER	pyruvate decarboxylase 2	94.4	105.6	113	104.333	164.5	149.4	157.1	157	55.1	70	61.2	62.1	6.35708	6.16495	6.1161	6.09305	3.92672	9.84879	1.50479	0.589564	0.0263184	-1.57974	1.57974	0.595208	-0.748535	0.0132013	-1.87938	1.87938	0.395541	-1.3381	0.00825225	-2.08343	2.08343
KAG1335246	A0A8B9ANE8	AT1G53310	EGU1876G0326-MONOMER	phosphoenolpyruvate carboxylase, housekeeping isozyme	106.2	101.3	112.2	106.567	75.1	80.4	69.1	74.8667	53.5	82.8	74.9	70.4	4.06028	4.61616	12.3777	3.81008	6.16584	17.5819	0.702534	-0.509361	0.0386035	-1.41337	1.41337	0.660619	-0.598109	0.0673024	-1.17197	1.17197	0.940338	-0.0887481	0.656057	-0.183058	0.183058
KAG1364226	A0A8B7BPZ5	AT3G57880	#N/A	FT-interacting protein 7	109.6	112.8	111.6	111.333	192.6	244.7	225.4	220.9	214	213	218.8	215.267	2.19292	21.5064	2.53158	1.96969	9.73582	1.17602	1.98413	0.988508	0.0165519	-1.78115	1.78115	1.93353	0.951239	0.000382832	-3.41699	3.41699	0.974498	-0.0372685	0.748606	-0.125747	0.125747
KAG1365216	A0A8B7CJZ7	AT3G12290	EGU2211G0821-MONOMER	bifunctional protein FolD 2	114	107.4	109.8	110.4	111	110.7	116.3	112.667	106.8	129	112.3	116.033	2.18053	2.57207	9.43975	1.97512	2.2829	8.13538	1.02053	0.0293206	0.501962	-0.299329	0.299329	1.05103	0.0717991	0.574018	-0.241074	0.241074	1.02988	0.0424786	0.696244	-0.157238	0.157238
KAG1348100	A0A8B8Z8R8	AT2G22780	MONOMER8I-771	malate dehydrogenase, glyoxysomal	109.4	111	107.9	109.433	55.4	62	63.7	60.3667	76.2	70.6	80.1	75.6333	6.21434	3.57988	3.899	5.67866	5.93023	5.15514	0.55163	-0.858228	0.00330825	-2.4804	2.4804	0.691136	-0.532958	0.0114592	-1.94084	1.94084	1.2529	0.32527	0.0504952	-1.29675	1.29675
KAG1361846	A0A8B7BTR9	AT2G20420	EGU0206G0928-MONOMER	putative Succinate--CoA ligase [ADP-forming] subunit beta, mitochondrial	98.5	94	107.3	99.9333	53.8	52.9	36.6	47.7667	30.4	34.6	42.3	35.7667	5.54038	7.90457	4.9277	5.54408	16.5483	13.7774	0.477985	-1.06496	0.0304972	-1.51574	1.51574	0.357905	-1.48235	0.00157039	-2.80399	2.80399	0.748779	-0.417389	0.312859	-0.504651	0.504651
KAG1330165	A0A8B7BP52	AT3G13920	#N/A	Eukaryotic initiation factor 4A-14	109.2	98.8	106.3	104.767	58.8	66.4	68.6	64.6	15.1	12.6	16	14.5667	3.74374	4.19841	1.43836	3.5734	6.49909	9.87435	0.616608	-0.697574	0.0172227	-1.7639	1.7639	0.139039	-2.84644	0.000638928	-3.19455	3.19455	0.22549	-2.14886	0.00402922	-2.39478	2.39478
KAG1354450	A0A8B9AGU5	AT3G20050	#N/A	putative T-complex protein 1 subunit alpha	99.7	105.5	106.1	103.767	66.4	60.3	59.3	62	41.9	32	31.6	35.1667	5.00991	3.13794	4.76399	4.82805	5.06119	13.5469	0.597494	-0.743003	0.0102361	-1.98986	1.98986	0.338901	-1.56106	0.00615678	-2.21065	2.21065	0.567204	-0.81806	0.00192644	-2.71524	2.71524
KAG1326903	A0A8B7BMY9	AT4G30160	#N/A	putative Villin-3	115	112.5	105.9	111.133	96.9	90.9	92.9	93.5667	22.1	25.6	20.6	22.7667	4.15291	2.49444	2.09497	3.73687	2.66595	9.20191	0.841932	-0.248225	0.0196108	-1.7075	1.7075	0.204859	-2.2873	0.000684575	-3.16458	3.16458	0.24332	-2.03907	0.0016087	-2.79352	2.79352
KAG1347360	A0A8B7CQU8	AT2G05710	EGU2506G0029-MONOMER	Aconitate hydratase	112.1	103.9	105.8	107.267	77.4	87.4	57.8	74.2	76.6	83.6	85.3	81.8333	3.12339	12.2942	3.76504	2.9118	16.569	4.60087	0.691734	-0.531711	0.0684941	-1.16435	1.16435	0.762896	-0.390441	0.0370099	-1.43168	1.43168	1.10288	0.141269	0.523948	-0.280712	0.280712
KAG1346985	A0A8B9A7D4	AT3G18130	#N/A	guanine nucleotide-binding protein subunit beta-like protein A	108.1	102.5	105.2	105.267	59.1	69.2	68.2	65.5	46.4	48.8	45.7	46.9667	4.56277	4.54386	1.32749	4.33449	6.93719	2.82645	0.622229	-0.684482	0.0139038	-1.85687	1.85687	0.446168	-1.16434	0.00167086	-2.77706	2.77706	0.717048	-0.479858	0.0248765	-1.60421	1.60421
KAG1359199	A0A8B7D4K5	AT1G63120	#N/A	Rhomboid-like protein	93.7	105.1	104.8	101.2	258.7	296.2	301.5	285.467	256.5	271.4	249.5	259.133	3.92598	19.0502	9.13248	3.87943	6.67334	3.52424	2.82082	1.49611	0.0027983	-2.55311	2.55311	2.56061	1.35649	0.00179132	-2.74683	2.74683	0.907753	-0.139628	0.208877	-0.680109	0.680109
KAG1360604	A0A8B9A449	AT3G49010	MONOMER8I-1896	putative 60S ribosomal protein L13-2	100.3	99.8	103.5	101.2	47.1	49.1	40.1	45.4333	25.1	16	19.5	20.2	5.47378	3.85861	3.74789	5.40887	8.49291	18.5539	0.448946	-1.15539	0.00481648	-2.31727	2.31727	0.199605	-2.32478	0.00127986	-2.89284	2.89284	0.444607	-1.1694	0.0236857	-1.62551	1.62551
BAV824681	#N/A	AT1G74920	MONOMER8I-584	betaine aldehyde dehydrogenase 2	88.8	92.4	103	94.7333	63.4	47.7	45.5	52.2	64.3	78.4	61.9	68.2	6.40798	7.97036	7.27874	6.76423	15.2689	10.6726	0.55102	-0.859822	0.0448979	-1.34777	1.34777	0.719916	-0.4741	0.0781738	-1.10694	1.10694	1.30651	0.385722	0.204056	-0.690251	0.690251
KAG1326808	A0A8B8J1D3	AT2G33590	MONOMER8I-2112	cinnamoyl-CoA reductase 1	104.3	90.8	102.5	99.2	175.7	196.2	191.3	187.733	279.4	287.4	296.4	287.733	5.24595	8.74084	6.94422	5.28826	4.65599	2.41342	1.89247	0.920273	0.0120705	-1.91828	1.91828	2.90054	1.53632	0.00128382	-2.8915	2.8915	1.53267	0.616048	0.00194663	-2.71072	2.71072
KAG1328058	A0A8B7BQN8	AT3G12960	#N/A	putative Seed maturation protein	106.6	105.4	100.6	104.2	183.5	197.6	195.2	192.1	200.1	210.8	210.7	207.2	5.4362	6.15955	5.02062	5.21708	3.20643	2.42308	1.84357	0.882502	0.0039537	-2.403	2.403	1.98848	0.991669	0.00229234	-2.63972	2.63972	1.0786	0.109166	0.00437156	-2.35936	2.35936
KAG1331467	A0A8B7D1M6	AT5G41670	MONOMER8I-3025	6-phosphogluconate dehydrogenase, decarboxylating 1, chloroplastic	104.6	116.4	99.8	106.933	63.9	51.2	54.3	56.4667	26.3	37.2	22.4	28.6333	7.63384	5.40637	6.2633	7.13888	9.57445	21.8741	0.528055	-0.92124	0.0213572	-1.67046	1.67046	0.267768	-1.90094	4.40364e-05	-4.35619	4.35619	0.507084	-0.979704	0.0594861	-1.22558	1.22558
KAG1354273	A0A8B7CCL6	#N/A	EGU2621G1413-MONOMER	Glucan endo-1,3-beta-glucosidase	91.4	105.5	98.9	98.6	809.4	907.3	987.6	901.433	3299	3287.3	3455.8	3347.37	6.83409	72.868	76.8226	6.93112	8.08357	2.29502	9.14233	3.19256	0.00374659	-2.42636	2.42636	33.949	5.0853	0.000282099	-3.5496	3.5496	3.71338	1.89273	0.000187987	-3.72587	3.72587
KAG1326122	A0A8B8JCS2	AT3G62250	#N/A	Ubiquitin-40S ribosomal protein S27a	90.4	84.3	97.6	90.7667	256.3	319.4	336.6	304.1	302.4	283	297.9	294.433	4.68345	34.5214	8.29069	5.15988	11.352	2.81581	3.35035	1.74431	0.0121615	-1.91501	1.91501	3.24385	1.69771	0.000423415	-3.37323	3.37323	0.968212	-0.0466048	0.761972	-0.118061	0.118061
KAG1334406	A0A8B7CED1	#N/A	MONOMER8I-2580	pectinesterase 3	91.8	97.2	96	95	151.5	165.2	154.4	157.033	227.1	248.8	236.7	237.533	4.58757	5.89482	8.87856	4.82903	3.75386	3.73782	1.65298	0.725071	0.00234123	-2.63056	2.63056	2.50035	1.32213	0.00112928	-2.9472	2.9472	1.51263	0.597059	0.000946663	-3.0238	3.0238
KAG1358700	A0A8B7CW22	AT1G66430	MONOMER8I-2883	Fructokinase-2	104.7	90.4	95.6	96.9	43.4	30.5	21.6	31.8333	11.2	13.8	8.7	11.2333	4.65788	8.94961	2.0822	4.80689	28.114	18.5359	0.328517	-1.60596	0.00471747	-2.32629	2.32629	0.115927	-3.10871	0.00327878	-2.48429	2.48429	0.35288	-1.50275	0.073206	-1.13545	1.13545
KAG1360826	A0A8B7CY11	AT4G12420	EGU2059G0001-MONOMER	monocopper oxidase-like protein SKU5	101.8	96.1	95.5	97.8	157.8	174.1	176.5	169.467	178.7	186.6	214.2	193.167	3.20243	8.30756	15.2185	3.27447	4.90218	7.87842	1.73279	0.793095	0.011878	-1.92526	1.92526	1.97512	0.98194	0.0162554	-1.789	1.789	1.13985	0.188845	0.0853783	-1.06865	1.06865
KAG1326601	A0A8B7C259	AT2G30050	#N/A	protein transport protein SEC13	90.9	96.2	94.7	93.9333	55.3	48.5	46.8	50.2	27.6	34.4	25.5	29.1667	3.91213	3.67242	3.79854	4.16479	7.31558	13.0236	0.534422	-0.90395	0.00853787	-2.06865	2.06865	0.310504	-1.68732	0.00121386	-2.91583	2.91583	0.581009	-0.783367	0.0331554	-1.47945	1.47945
KAG1347051	A0A8B7D1Y1	AT3G04880	EGU2441G0851-MONOMER	putative Bifunctional nuclease 2	99.2	103.3	94.6	99.0333	146	126.5	128.8	133.767	135.6	136.6	137.2	136.467	4.90762	8.70109	0.659966	4.95552	6.50467	0.48361	1.35072	0.433733	0.0364384	-1.43844	1.43844	1.37799	0.462562	0.00529181	-2.2764	2.2764	1.02018	0.0288299	0.720887	-0.142133	0.142133
KAG1330929	A0A8B7CQJ8	AT3G62870	#N/A	60S ribosomal protein L7a-2	88.3	91.4	94.5	91.4	76.5	69.6	68.6	71.5667	50.4	47	44.6	47.3333	3.14272	3.5122	2.37954	3.43842	4.90759	5.0272	0.783005	-0.352906	0.0418009	-1.37881	1.37881	0.51787	-0.949338	0.00613695	-2.21205	2.21205	0.661388	-0.596431	0.00175685	-2.75526	2.75526
KAG1366758	A0A8B7BUN1	AT5G15650	MONOMER8I-1986	UDP-arabinopyranose mutase 1	98.7	93.4	93.5	95.2	67.9	58.9	53.8	60.2	53.1	37	55	48.3667	3.75651	5.82924	8.07479	3.94592	9.68312	16.6949	0.632353	-0.661198	0.00539547	-2.26797	2.26797	0.508053	-0.976948	0.0121228	-1.9164	1.9164	0.803433	-0.31575	0.225376	-0.647092	0.647092
KAG1366283	A0A8B8ZIH4	AT5G42790	#N/A	proteasome subunit alpha type-1	99	103.3	93.4	98.5667	66.1	66.9	74.6	69.2	71.7	65.4	62.5	66.5333	5.23686	3.83232	3.84043	5.31302	5.53803	5.77219	0.702063	-0.510328	0.0319517	-1.49551	1.49551	0.675008	-0.567023	0.00930625	-2.03123	2.03123	0.961464	-0.0566947	0.655754	-0.183259	0.183259
KAG1331325	A0A8B7BRB9	AT4G24830	EGU1685G0386-MONOMER	putative Argininosuccinate synthase, chloroplastic	92.3	87.8	90.5	90.2	36.6	34.5	37	36.0333	11	7		9	4.69021	1.09646	2	5.19979	3.0429	22.2222	0.399483	-1.3238	0.000201407	-3.69593	3.69593	0.0997783	-3.32513	0.00196366	-2.70693	2.70693	0.249769	-2.00134	0.0227695	-1.64265	1.64265
KAG1330110	A0A8B7C8R1	AT5G19680	#N/A	protein phosphatase 1 regulatory inhibitor subunit PPP1R7	97.8	101.2	90.1	96.3667	57.2	68.3	55.8	60.4333	33.7	39.8	42.8	38.7667	6.44948	5.59186	3.78623	6.69265	9.25294	9.76672	0.627119	-0.67319	0.00431497	-2.36502	2.36502	0.402283	-1.31372	0.00807825	-2.09268	2.09268	0.641478	-0.640528	0.0416794	-1.38008	1.38008
KAG1338889	A0A8B9A7R9	#N/A	#N/A	ricin B-like lectin R40G3	85.1	86.5	84.4	85.3333	96.6	103.5	100.6	100.233	182.8	214.6	221.1	206.167	5.48799	2.82882	16.7345	6.43124	2.82223	8.11696	1.17461	0.232181	0.0129997	-1.88607	1.88607	2.41602	1.27263	0.00944959	-2.02459	2.02459	2.05687	1.04045	0.00920267	-2.03609	2.03609
KAG1330463	A0A8B7CZM7	AT1G23750	#N/A	hypothetical protein COCNU_02G004310	86.7	99.4	82.8	89.6333	109.7	103	112	108.233	94.1	102	92	96.0333	9.1416	3.81779	4.30529	10.1989	3.52737	4.48312	1.20751	0.272038	0.137322	-0.86226	0.86226	1.0714	0.0994999	0.0830908	-1.08045	1.08045	0.887281	-0.172538	0.167554	-0.775846	0.775846
KAG1364298	A0A8B7MSV5	AT4G29160	#N/A	putative Vacuolar protein sorting-associated protein 32	77.2	69.7	80	75.6333	63.7	78.1	62.2	68	53.1	48.6	66.2	55.9667	5.12795	7.16798	7.46562	6.78001	10.5412	13.3394	0.899074	-0.153487	0.44605	-0.350617	0.350617	0.739974	-0.434454	0.0233421	-1.63186	1.63186	0.823039	-0.280967	0.340449	-0.467948	0.467948
KAG1363228	A0A8B7CNR0	AT2G37770	MONOMER8I-1939	NADPH-dependent aldo-keto reductase, chloroplastic	80.5	87	79.9	82.4667	69.9	74.1	62	68.6667	42.3	52	36.3	43.5333	2.71702	5.0162	6.46856	3.29469	7.30514	14.8589	0.83266	-0.264201	0.0235252	-1.62847	1.62847	0.52789	-0.921691	0.00412903	-2.38415	2.38415	0.633981	-0.657489	0.00409248	-2.38801	2.38801
KAG1334647	A0A8B7CS20	#N/A	EGU2211G1104-MONOMER	Tuliposide A-converting enzyme b3, amyloplastic	82.4	81.2	78.4	80.6667	63.1	62.9	69.5	65.1667	109.3	129.4	136.2	124.967	2.77694	3.06522	11.4205	3.44249	4.70366	9.13887	0.807851	-0.307838	0.042766	-1.3689	1.3689	1.54917	0.631499	0.0399531	-1.39845	1.39845	1.91765	0.939337	0.0126859	-1.89668	1.89668
KAG1331349	A0A8B7D3J4	AT5G40760	MONOMER8I-2214	glucose-6-phosphate 1-dehydrogenase, cytoplasmic isoform	73.9	76.9	78.3	76.3667	90.1	88.1	72.6	83.6	49.2	51.6	41.5	47.4333	1.93821	7.82091	4.30839	2.53803	9.35516	9.08304	1.09472	0.13056	0.388941	-0.410116	0.410116	0.621126	-0.687042	0.0180179	-1.7443	1.7443	0.567384	-0.817602	0.00608389	-2.21582	2.21582
KAG1365868	A0A8B9AN17	AT2G39940	#N/A	coronatine-insensitive protein	77.6	80.4	77.9	78.6333	88	82.7	83.2	84.6333	52.9	51.2	47.7	50.6	4.72914	2.38933	2.16487	6.01416	2.82315	4.2784	1.0763	0.106085	0.126481	-0.897974	0.897974	0.643493	-0.636004	0.00362094	-2.44118	2.44118	0.597873	-0.742089	0.0013938	-2.8558	2.8558
KAG1366608	A0A8B9B1M3	AT3G19170	#N/A	putative Presequence protease 1, chloroplastic/mitochondrial	66.5	80.4	75.7	74.2	35.4	25.8	32.9	31.3667	17.2	16	26.6	19.9333	6.64591	4.06639	4.73943	8.95675	12.9641	23.7764	0.422731	-1.24219	0.0241778	-1.61658	1.61658	0.268643	-1.89624	0.00860598	-2.0652	2.0652	0.635494	-0.654049	0.0835917	-1.07784	1.07784
KAG1366739	A0A8B9B1G8	AT4G34490	#N/A	cyclase-associated protein 1-like	60.3	71.1	75.7	69.0333	53.8	62.5	58.2	58.1667	37	48.4	28.6	38	6.87421	3.55184	8.11419	9.95781	6.10631	21.3531	0.842588	-0.247101	0.0842769	-1.07429	1.07429	0.550459	-0.861294	0.0609732	-1.21486	1.21486	0.653295	-0.614193	0.0518627	-1.28514	1.28514
KAG1369674	A0A8B7BYN2	AT3G54250	EGU1863G0032-MONOMER	diphosphomevalonate decarboxylase MVD2, peroxisomal	56.7	65.7	73.2	65.2	53.5	45	37.9	45.4667	40.6	51.2	48	46.6	8.39274	6.37722	4.43922	12.8723	14.0261	9.52622	0.697342	-0.520063	0.167308	-0.776483	0.776483	0.714724	-0.484542	0.0306275	-1.51389	1.51389	1.02493	0.0355207	0.887941	-0.0516161	0.0516161
KAG1338888	A0A8B9A7R9	AT2G39050	#N/A	Ricin B-like lectin R40G2	77.6	82.9	71.8	77.4333	57.8	58.9	49.6	55.4333	71.5	83.4	58.1	71	4.05932	4.14916	10.3347	5.24234	7.48496	14.556	0.715885	-0.482201	0.0030439	-2.51657	2.51657	0.916918	-0.125136	0.25739	-0.589408	0.589408	1.28082	0.357065	0.0806962	-1.09315	1.09315
AQT256741	A0A8B7MTE1	#N/A	#N/A	#N/A	73.3	73.1	71.4	72.6	98	99.7	91.5	96.4	75.1	85.4	84.9	81.8	3.35062	3.53365	4.74201	4.61518	3.66561	5.79708	1.32782	0.409064	0.00650911	-2.18648	2.18648	1.12672	0.172131	0.131689	-0.880451	0.880451	0.848548	-0.236932	0.0901381	-1.04509	1.04509
KAG1358818	A0A8B9AKZ9	AT1G50480	EGU2211G0501-MONOMER	formate--tetrahydrofolate ligase	64.4	74.7	70.3	69.8	34.7	41.2	27.6	34.5	20.2	37.8	24.3	27.4333	3.03173	5.55398	7.51901	4.34345	16.0985	27.4083	0.494269	-1.01663	0.011742	-1.93026	1.93026	0.393028	-1.3473	0.00428505	-2.36804	2.36804	0.795169	-0.330666	0.197626	-0.704157	0.704157
KAG1359006	A0A8B7BWX6	AT4G38220	EGU2211G1216-MONOMER	aminoacylase-1	69.4	71.1	70.2	70.2333	57.5	51.7	48.1	52.4333	33.7	29.8	34	32.5	2.41776	3.87241	1.91311	3.44247	7.3854	5.8865	0.746559	-0.421672	0.0281491	-1.55054	1.55054	0.462743	-1.11172	0.00224073	-2.64961	2.64961	0.619835	-0.690045	0.0214561	-1.66845	1.66845
KAG1354798	A0A8B8ZIW8	AT1G04560	#N/A	membrane protein PM19L	67.3	75.3	70.1	70.9	542.4	582.5	596.9	573.933	640.8	659.5	666.8	655.7	4.38925	23.0594	10.9493	6.19077	4.01778	1.66986	8.09497	3.01703	0.000896197	-3.0476	3.0476	9.24824	3.20918	0.000131391	-3.88144	3.88144	1.14247	0.192153	0.0107963	-1.96673	1.96673
KAG1361405	A0A8B7CJF5	AT5G03340	EGU0799G0010-MONOMER	Cell division cycle protein 48	79.7	76.4	69.4	75.1667	28.1	24.2	23.6	25.3	24.5	23.8	20.8	23.0333	5.73171	1.99499	1.60485	7.62533	7.88535	6.96753	0.336585	-1.57096	0.0016705	-2.77715	2.77715	0.30643	-1.70637	0.00135288	-2.86874	2.86874	0.910408	-0.135414	0.142463	-0.846297	0.846297
KAG1347737	A0A8B7BV58	AT3G22630	#N/A	proteasome subunit beta type-2-B	63.2	65.8	69.4	66.1333	48.9	46.1	46.8	47.2667	43.9	44.6	52.9	47.1333	4.40848	1.18977	4.08765	6.66605	2.51715	8.67253	0.714718	-0.484554	0.0162129	-1.79014	1.79014	0.712702	-0.48863	0.00512197	-2.29056	2.29056	0.997179	-0.00407541	0.971236	-0.0126754	0.0126754
KAG1361157	A0A8B7D4X3	AT5G05010	#N/A	coatomer subunit delta-2	56	64.1	68.6	62.9	25.4	25.9	24.1	25.1333	12.3	19.6	13.3	15.0667	4.30481	0.758654	3.23144	6.8439	3.01852	21.4476	0.399576	-1.32346	0.0111326	-1.9534	1.9534	0.239534	-2.0617	0.0060594	-2.21757	2.21757	0.599469	-0.738242	0.0371711	-1.42979	1.42979
KAG1355209	A0A8B9A0D4	AT1G73190	#N/A	aquaporin TIP3-1	66	62.5	68.5	65.6667	102.4	103.2	107.2	104.267	117.2	103.8	105.9	108.967	3.53836	2.09974	5.88463	5.38837	2.01381	5.4004	1.58782	0.667045	0.00103422	-2.98539	2.98539	1.65939	0.730654	0.00887821	-2.05167	2.05167	1.04508	0.0636089	0.452513	-0.344369	0.344369
KAG1361999	A0A8B7CPV9	AT3G02360	MONOMER8I-3025	6-phosphogluconate dehydrogenase, decarboxylating 1	59.4	69.1	68.1	65.5333	66.9	84.8	82.7	78.1333	71.1	75.2	78.9	75.0667	5.74127	7.9893	3.18573	8.76084	10.2252	4.24387	1.19227	0.253709	0.0391659	-1.40709	1.40709	1.14547	0.195944	0.0316039	-1.50026	1.50026	0.960751	-0.0577657	0.523463	-0.281114	0.281114
KAG1339182	A0A8B7C9F7	AT1G75270	MONOMER8I-1568	glutathione S-transferase DHAR2-like	66.5	79	67.9	71.1333	31.3	31.4	31.6	31.4333	46.6	36	43.2	41.9333	4.78774	0.124722	4.41915	6.73066	0.396782	10.5385	0.441893	-1.17823	0.009817	-2.00802	2.00802	0.589503	-0.762428	0.0534734	-1.27186	1.27186	1.33404	0.415802	0.0788647	-1.10312	1.10312
KAG1327749	A0A8B7CAL5	AT3G12490	#N/A	Cysteine proteinase inhibitor	66.8	69.5	64	66.7667	17.7	15.1		16.4	10.2	8.8		9.5	3.17578	1.3	0.7	4.75653	7.92683	7.36842	0.245632	-2.02543	0.0325714	-1.48716	1.48716	0.142287	-2.81313	0.0222428	-1.65281	1.65281	0.579268	-0.787696	0.0552193	-1.25791	1.25791
KAG1360756	A0A8B7D4Q0	AT2G45290	EGU0709G0619-MONOMER	transketolase, chloroplastic	60.9	61.1	61.9	61.3	43.8	36.1	43.2	41.0333	21.2	29.8	22.6	24.5333	1.66174	3.49698	3.7677	2.71084	8.5223	15.3575	0.669386	-0.579091	0.0138624	-1.85816	1.85816	0.400218	-1.32114	0.00549114	-2.26034	2.26034	0.597888	-0.742053	0.0846555	-1.07234	1.07234
KAG1346394	A0A8B7CFK6	AT5G56730	#N/A	Zinc protease PQQL-like	63.3	57.8	60.5	60.5333	27.3	26.3	18.7	24.1	18	8.2	18.7	14.9667	4.11072	3.84014	4.79328	6.79084	15.9342	32.0264	0.398128	-1.3287	0.00662918	-2.17854	2.17854	0.247247	-2.01598	0.00244141	-2.61236	2.61236	0.621024	-0.68728	0.222613	-0.65245	0.65245
KAG1342481	A0A8B9AX88	AT1G62640	EGU2755G0074-MONOMER	3-oxoacyl-[acyl-carrier-protein] synthase III, chloroplastic	69.1	67.8	60.2	65.7	19	25.6	20.9	21.8333	13.7	17.4	9.8	13.6333	5.1587	2.77409	3.10305	7.85191	12.7057	22.7607	0.332319	-1.58936	0.00536857	-2.27014	2.27014	0.207509	-2.26876	0.00102308	-2.99009	2.99009	0.624427	-0.679394	0.0392531	-1.40613	1.40613
KAG1330429	A0A8B7BQE3	AT4G20260	#N/A	plasma membrane-associated cation-binding protein 1	57.2	55.3	59.6	57.3667	63.2	63.9	63.7	63.6	65.3	82.4	87.2	78.3	2.27724	0.294392	9.39894	3.96963	0.462881	12.0037	1.10866	0.148814	0.0411013	-1.38614	1.38614	1.3649	0.4488	0.0825359	-1.08336	1.08336	1.23113	0.299986	0.150781	-0.821654	0.821654
KAG1363943	A0A8B7MVD8	AT1G47128	#N/A	oryzain alpha chain	56.6	52.8	59	56.1333	62.9	72.7	64.9	66.8333	76.8	70.6	78.3	75.2333	5.09589	4.22795	3.333	9.07818	6.32611	4.43022	1.19062	0.25171	0.145602	-0.836831	0.836831	1.34026	0.422514	0.00134046	-2.87274	2.87274	1.12569	0.170804	0.250856	-0.600576	0.600576
KAG1334399	A0A8B7CE72	AT1G72330	MONOMER8I-2575	putative Alanine aminotransferase 2	69.4	57.2	58.5	61.7	59.9	63.1	47.7	56.9	53.9	74	58.5	62.1333	4.36224	6.63526	8.59858	7.07009	11.6613	13.8389	0.922204	-0.116842	0.465234	-0.332328	0.332328	1.00702	0.010097	0.967164	-0.0144997	0.0144997	1.09197	0.126939	0.449834	-0.346948	0.346948
KAG1337931	A0A8B7BGV8	AT5G09810	#N/A	Actin-101	62.7	57.5	58	59.4	28.4	25.8	25.2	26.4667	13.7	12.8	10.6	12.3667	3.6785	1.38884	1.30213	6.19277	5.24752	10.5294	0.445567	-1.16629	0.000523078	-3.28143	3.28143	0.208193	-2.26401	0.000710972	-3.14815	3.14815	0.467254	-1.09772	0.00152226	-2.81751	2.81751
KAG1362559	A0A8B7BSK8	AT5G03340	EGU0799G0010-MONOMER	Cell division cycle protein 48	53	51.3	57	53.7667	29.2	35.2	23.4	29.2667	7.8	9.6	7.9	8.43333	2.03039	4.81756	0.825967	3.77631	16.4609	9.79408	0.544327	-0.877454	0.0401648	-1.39615	1.39615	0.156851	-2.67254	0.00221526	-2.65458	2.65458	0.288155	-1.79508	0.0192032	-1.71663	1.71663
KAG1334365	A0A8B7C6Q4	AT5G20720	#N/A	20 kDa chaperonin, chloroplastic	53.9	52.7	56.4	54.3333	32.4	30.3	22.7	28.4667	17.2	15.2	15.2	15.8667	3.11163	4.1668	0.942809	5.72692	14.6375	5.94207	0.523926	-0.932564	0.0222621	-1.65243	1.65243	0.292025	-1.77584	0.0012958	-2.88746	2.88746	0.557377	-0.843274	0.0386067	-1.41334	1.41334
KAG1360753	A0A8B7D4I4	AT3G47370	#N/A	putative 40S ribosomal protein S20-2	57.3	62.5	56	58.6	18.5	13.3	15.9	15.9	13.1	11.2	7.3	10.5333	3.62893	2.12289	2.41431	6.19272	13.3515	22.9207	0.271331	-1.88187	0.00581915	-2.23514	2.23514	0.17975	-2.47594	0.00185644	-2.73132	2.73132	0.662474	-0.594065	0.103603	-0.984628	0.984628
KAG1361971	A0A8B7CYR1	AT4G35100	EGU0935G1416-MONOMER	Aquaporin PIP2-7	51.9	51.8	55	52.9	101.9	105.5	105.5	104.3	134	113	137.6	128.2	3.8823	1.69706	10.848	7.33893	1.62709	8.46181	1.97164	0.9794	0.000508073	-3.29407	3.29407	2.42344	1.27706	0.00865571	-2.0627	2.0627	1.22915	0.297657	0.100314	-0.998638	0.998638
KAG1359490	A0A8B7CR54	AT3G02720	MONOMER8I-1888	protein DJ-1	61.7	49.5	53.1	54.7667	52.5	48.5	61.5	54.1667	47	39	47.3	44.4333	3.85072	5.4365	3.8439	7.03114	10.0366	8.65093	0.989044	-0.0158928	0.916848	-0.0377025	0.0377025	0.811321	-0.301656	0.0566738	-1.24662	1.24662	0.820308	-0.285763	0.0607096	-1.21674	1.21674
KAG1330986	A0A8B7BRW2	AT1G66240	#N/A	Copper transport protein ATX1	52.7	51.7	52.2	52.2	41.5	44	44.1	43.2	36.8	29.8	31.6	32.7333	1.33375	1.20277	2.96798	2.55508	2.7842	9.06714	0.827586	-0.273018	0.0147691	-1.83065	1.83065	0.627075	-0.673289	0.0086504	-2.06296	2.06296	0.757716	-0.400271	0.0699878	-1.15498	1.15498
KAG1371564	A0A8B8ZL04	AT4G26300	EGU2621G0588-MONOMER	putative Arginine--tRNA ligase, chloroplastic/mitochondrial	49.7	54.1	51.4	51.7333	43.3	45	41.9	43.4	43.7	26.4	26.6	32.2333	4.78832	1.26754	8.10857	9.25578	2.92061	25.1558	0.838918	-0.253399	0.0133748	-1.87371	1.87371	0.623067	-0.682541	0.103177	-0.986416	0.986416	0.742704	-0.429142	0.197044	-0.705436	0.705436
KAG1355350	A0A8B7C124	AT4G35090	EGU0709G0025-MONOMER	putative Catalase isozyme 1	54.1	39.9	49.7	47.9	68.7	65.9	71.2	68.6	210.9	200.4	257	222.767	4.66833	2.16487	24.5832	9.746	3.15579	11.0354	1.43215	0.518183	0.0247018	-1.60727	1.60727	4.65066	2.21744	0.0085272	-2.06919	2.06919	3.24733	1.69925	0.0105638	-1.97618	1.97618
KAG1361180	A0A8B7CPG8	#N/A	#N/A	putative Anamorsin	44.2	51.1	49	48.1	20.9	13.1	7.7	13.9	7.1	9.4		8.25	4.44475	5.41849	1.15	9.24065	38.9819	13.9394	0.288981	-1.79095	0.025186	-1.59884	1.59884	0.171518	-2.54357	0.037121	-1.43038	1.43038	0.593525	-0.752619	0.333234	-0.47725	0.47725
KAG1342031	A0A8B9AHF4	#N/A	MONOMER8I-2280	putative Alpha-L-fucosidase 2	37.5	43.3	47.6	42.8	78.1	58.9	70.1	69.0333	85.2	73.4	82.6	80.4	5.95746	7.87457	5.06228	13.9193	11.4069	6.29637	1.61293	0.689682	0.0721191	-1.14195	1.14195	1.8785	0.909585	0.0189041	-1.72344	1.72344	1.16465	0.219902	0.0357879	-1.44626	1.44626
KAG1348254	A0A8B7CDB9	#N/A	#N/A	late embryogenesis abundant protein 31-like	54.2	54.6	47.3	52.0333	23.8	28.2	30.2	27.4	25.3	26.8	25.5	25.8667	3.7751	2.67333	0.664998	7.25516	9.75666	2.57087	0.526586	-0.92526	0.0246372	-1.60841	1.60841	0.497117	-1.00834	0.00703449	-2.15277	2.15277	0.944039	-0.0830817	0.482132	-0.316834	0.316834
KAG1335204	A0A8B8ZZL5	AT1G53280	EGU0935G1600-MONOMER	Protein DJ-1	44.4	50.5	47.1	47.3333	31.6	23.7	37.9	31.0667	24.9	22.2	25.1	24.0667	4.93795	5.80938	1.32246	10.4323	18.6997	5.49497	0.656338	-0.607489	0.0938317	-1.02765	1.02765	0.508451	-0.97582	0.0124265	-1.90565	1.90565	0.774678	-0.368331	0.165285	-0.781766	0.781766
KAG1361947	A0A8B7BLG0	AT4G34980	#N/A	subtilisin-like protease SBT1.6	39.3	55.2	46.1	46.8667	81.6	90.7	86.7	86.3333	81.1	86.2	84.1	83.8	5.86506	3.7241	2.09284	12.5143	4.31362	2.49743	1.84211	0.881356	0.00266929	-2.5736	2.5736	1.78805	0.838388	0.00725454	-2.13939	2.13939	0.970656	-0.0429674	0.159592	-0.796988	0.796988
KAG1326205	A0A8B9AXA8	AT2G47470	#N/A	Disulfide-isomerase-like protein	38.6	50.7	45.9	45.0667	65.9	55.5	84.1	68.5	59.8	50.2	46.9	52.3	3.91989	11.8198	5.47175	8.69799	17.2551	10.4622	1.51997	0.604043	0.140038	-0.853753	0.853753	1.1605	0.21475	0.409853	-0.387372	0.387372	0.763504	-0.389293	0.26291	-0.580193	0.580193
KAG1338030	A0A8B7CSN7	AT3G11130	#N/A	Clathrin heavy chain 1	48.4	42.6	44.2	45.0667	32.6	39.9	36.6	36.3667	33.3	27	25.7	28.6667	3.46394	2.98478	3.31897	7.68626	8.20745	11.5778	0.806953	-0.309444	0.150549	-0.822323	0.822323	0.636095	-0.652687	0.0041506	-2.38189	2.38189	0.788268	-0.343243	0.210979	-0.675761	0.675761
KAG1342451	A0A8B9A951	#N/A	MONOMER8I-966	aldose 1-epimerase	51.2	51.1	44.1	48.8	95.3	95.8	112.9	101.333	153.4	160	168.6	160.667	3.19396	8.18142	6.22325	6.545	8.07377	3.87339	2.0765	1.05416	0.0231513	-1.63542	1.63542	3.29235	1.71912	0.0034692	-2.45977	2.45977	1.58553	0.664962	0.00181332	-2.74152	2.74152
KAG1346448	A0A8B7BFJ5	AT3G58610	MONOMER8I-2382	ketol-acid reductoisomerase, chloroplastic	47.5	47.7	42.7	45.9667	37.7	30.7	35.9	34.7667	21.2	19.8	21	20.6667	3.24688	2.96798	0.618241	7.06355	8.53685	2.99149	0.756345	-0.402883	0.0658879	-1.18119	1.18119	0.449601	-1.15328	0.0053518	-2.2715	2.2715	0.594439	-0.750399	0.0136644	-1.86441	1.86441
KAG1365168	A0A8B7CVH6	AT2G47970	#N/A	NPL4-like protein	47.2	39	42.7	42.9667	19.5	22.1	20.7	20.7667	13.9	11.8	8.7	11.4667	2.85579	1.06249	2.13594	6.64653	5.11633	18.6273	0.48332	-1.04895	0.0191766	-1.71723	1.71723	0.266874	-1.90577	0.00466688	-2.33097	2.33097	0.552167	-0.856824	0.0398415	-1.39966	1.39966
KAG1371059	A0A8B7CN27	AT3G23600	EGU2135G0001-MONOMER	putative Endo-1,3-1,4-beta-D-glucanase	43.8	38.9	42.6	41.7667	13.7	21.2	16.1	17	16.1	19.6	13.7	16.4667	4.43797	3.1273	2.42258	10.6256	18.3959	14.712	0.407023	-1.29682	0.0214065	-1.66946	1.66946	0.394254	-1.3428	0.0139505	-1.85541	1.85541	0.968627	-0.0459862	0.753817	-0.122734	0.122734
KAG1365839	A0A8B9ANS8	AT5G06060	EGU2621G0427-MONOMER	Tropinone reductase	43.7	53.3	42.1	46.3667	72.5	60.6	67.9	67	24.9	33.4	30.7	29.6667	3.88959	4.89966	3.5462	8.38876	7.31293	11.9535	1.445	0.531073	0.0917767	-1.03727	1.03727	0.639827	-0.644245	0.024603	-1.60901	1.60901	0.442786	-1.17532	0.0239932	-1.61991	1.61991
KAG1361144	A0A8B7CQK7	AT5G16450	MONOMER8I-2806	4-hydroxy-4-methyl-2-oxoglutarate aldolase	46.3	44.1	41.9	44.1	34.8	50.5	49.2	44.8333	52.7	64.8	47.1	54.8667	3.65076	7.11446	7.38662	8.27837	15.8687	13.4629	1.01663	0.0237931	0.915603	-0.0382929	0.0382929	1.24414	0.315151	0.163075	-0.787613	0.787613	1.22379	0.291358	0.244646	-0.611463	0.611463
KAG1354077	A0A8B7BZ20	AT4G12290	EGU0206G0498-MONOMER	Amine oxidase	40.5	34.5	41.6	38.8667	63.4	60.4	56.2	60	57.6	61.6	52.5	57.2333	3.29212	2.95296	3.7241	8.47029	4.92161	6.50686	1.54374	0.626429	0.0246315	-1.60851	1.60851	1.47256	0.558322	0.0601278	-1.22092	1.22092	0.953889	-0.0681069	0.313815	-0.503326	0.503326
KAG1367844	A0A8B7CB20	AT3G09740	#N/A	Syntaxin-71	32.4	39.6	37.5	36.5	42.5	47.8	51.6	47.3	46.2	35.4	42.8	41.4667	2.58435	3.73184	4.50876	7.08042	7.88974	10.8732	1.29589	0.373944	0.0249541	-1.60286	1.60286	1.13607	0.184056	0.440225	-0.356325	0.356325	0.876674	-0.189888	0.354358	-0.450558	0.450558
KAG1365455	A0A8B7BWN9	#N/A	#N/A	putative Annexin-like protein RJ4	37.4	40.6	37.3	38.4333	133.2	125.1	154	137.433	102.5	89.6	91.3	94.4667	3.58209	12.1722	5.72266	9.32028	8.8568	6.05787	3.57589	1.8383	0.00895522	-2.04792	2.04792	2.45794	1.29745	0.007132	-2.14679	2.14679	0.687364	-0.540855	0.0497906	-1.30285	1.30285
KAG1327702	A0A8B7D311	AT3G43810	#N/A	#N/A	32.6	44.3	37.1	38	23.8	22.4	25.1	23.7667	38	24.6	21.4	28	3.79781	1.10252	7.19073	9.99423	4.63894	25.6812	0.625439	-0.67706	0.0689077	-1.16173	1.16173	0.736842	-0.440573	0.327702	-0.484521	0.484521	1.17812	0.236487	0.505844	-0.295983	0.295983
KAG1355160	A0A8B8ZFF1	AT2G20580	#N/A	hypothetical protein COCNU_07G012720	40.7	37.8	34.9	37.8	23.3	25.9	21.8	23.6667	13.1	15.6	12.9	13.8667	3.79799	1.69378	1.22837	10.0476	7.15681	8.85843	0.626102	-0.67553	0.0136707	-1.86421	1.86421	0.366843	-1.44677	0.00582239	-2.2349	2.2349	0.585915	-0.771235	0.00211047	-2.67562	2.67562
KAG1360647	A0A8B7CP85	AT3G13470	#N/A	RuBisCO large subunit-binding protein subunit beta, chloroplastic	28.2	34.6	34.9	32.5667	19	18.7	14.8	17.5	13.5	10.2	7.9	10.5333	2.27553	1.91311	2.29831	6.98731	10.9321	21.8194	0.537359	-0.896041	0.0416284	-1.38061	1.38061	0.323439	-1.62843	0.0276625	-1.55811	1.55811	0.601905	-0.732393	0.0151256	-1.82029	1.82029
KAG1328244	A0A8B9B2F8	#N/A	EGU1685G1683-MONOMER	putative Beta-hexosaminidase 3	33.1	34.2	33.7	33.6667	55.4	27.5	32.6	38.5	31.7	25.6	22.8	26.7	1.96589	12.1301	3.71573	5.83928	31.5068	13.9166	1.14356	0.193538	0.64087	-0.19323	0.19323	0.793069	-0.334481	0.135292	-0.868726	0.868726	0.693506	-0.528019	0.205251	-0.687716	0.687716
KAG1368308	A0A8B8JBI3	AT3G20390	EGU1876G1126-MONOMER	putative Reactive Intermediate Deaminase A, chloroplastic	35.2	38.6	32.7	35.5	44.4	34.5	34.8	37.9	33.1	30.4	33.4	32.3	2.6032	4.59783	1.34907	7.33297	12.1315	4.1767	1.06761	0.0943788	0.595977	-0.22477	0.22477	0.909859	-0.136285	0.347437	-0.459124	0.459124	0.852243	-0.230664	0.198527	-0.702181	0.702181
ABM530281	A0A8B7CBA0	AT5G56600	#N/A	profilin	36.1	30.9	32.3	33.1	12.6	16.6	12.3	13.8333	27.2	19.4	10	18.8667	2.63549	1.96016	7.03199	7.96222	14.1698	37.272	0.417925	-1.25868	0.0188185	-1.72541	1.72541	0.56999	-0.810992	0.0739793	-1.13089	1.13089	1.36386	0.447691	0.42046	-0.376276	0.376276
KAG1359479	A0A8B7D3T9	#N/A	#N/A	ubiquitin domain-containing protein DSK2a	34.5	38.1	31.2	34.6	26.8	20.3	39.5	28.8667	28.2	42.4	20.8	30.4667	6.09781	7.97343	8.96264	17.6237	27.6216	29.4179	0.834297	-0.261368	0.529263	-0.276328	0.276328	0.880539	-0.18354	0.444911	-0.351727	0.351727	1.05543	0.0778271	0.904385	-0.0436466	0.0436466
KAG1335243	A0A8B7D328	AT2G42590	#N/A	14-3-3-like protein D	34.1	18.7	31.2	28	43.6	44.5	38.2	42.1	26.1	22.4	26.4	24.9667	5.50437	2.78209	1.81904	19.6585	6.60828	7.28586	1.50357	0.588393	0.139182	-0.856418	0.856418	0.891667	-0.165424	0.476518	-0.32192	0.32192	0.593032	-0.753817	0.028926	-1.53871	1.53871
KAG1365496	A0A8B7BWM5	AT1G14980	#N/A	10 kDa chaperonin, mitochondria	24.8	33.9	30.8	29.8333	16.6	21	20.1	19.2333	21.6	18.6	14.1	18.1	2.93073	1.89795	3.08221	9.82367	9.86804	17.0288	0.644693	-0.633316	0.0160126	-1.79554	1.79554	0.606704	-0.720935	0.111536	-0.952585	0.952585	0.941075	-0.0876191	0.759752	-0.119328	0.119328
KAG1334341	A0A8B7C6L0	AT1G54100	EGU0935G0095-MONOMER	aldehyde dehydrogenase family 7 member A1	27.1	27.9	30.4	28.4667	19.8	21.9	20.5	20.7333	21	23	21	21.6667	1.27932	0.873053	0.942809	4.49411	4.21087	4.35143	0.728337	-0.457321	0.02128	-1.67203	1.67203	0.761124	-0.393796	0.0369856	-1.43197	1.43197	1.04502	0.0635251	0.0507111	-1.2949	1.2949
KAG1327445	A0A8B7C007	#N/A	#N/A	fasciclin-like arabinogalactan protein 2	28.8	30.5	29.9	29.7333	51.1	51.2	50.9	51.0667	125.8	108.6	107.5	113.967	1.44875	0.124722	8.37947	4.87249	0.244234	7.35256	1.71749	0.780301	0.000529365	-3.27625	3.27625	3.83296	1.93846	0.00569673	-2.24437	2.24437	2.23172	1.15816	0.00869707	-2.06063	2.06063
KAG1359597	A0A8B7BKC6	#N/A	#N/A	putative serine carboxypeptidase-like 51	31.9	27.2	29.5	29.5333	35.6	25.4	33.8	31.6	43.1	41.2	45.5	43.2667	2.49377	4.44522	1.75942	8.44392	14.0672	4.06645	1.06998	0.0975804	0.39854	-0.399528	0.399528	1.46501	0.550912	0.0101186	-1.99488	1.99488	1.3692	0.453331	0.0396856	-1.40137	1.40137
KAG1366787	A0A8B9B2L5	#N/A	MONOMER8I-2326	putative Biotin carboxyl carrier protein of acetyl-CoA carboxylase 1, chloroplastic	30.2	24.6	26.2	27	22.2	21.4	26	23.2	23.3	16.2	19.7	19.7333	3.02458	2.00666	2.89866	11.2021	8.64938	14.6891	0.859259	-0.218835	0.236326	-0.626489	0.626489	0.730864	-0.452325	0.0062741	-2.20245	2.20245	0.850575	-0.23349	0.271533	-0.566178	0.566178
KAG1327383	A0A8B8IZL3	AT4G17170	EGU0935G1782-MONOMER	ras-related protein RABB1c	23.1	31.6	25.6	26.7667	33.4	25.6	32.6	30.5333	18.8	20	20.1	19.6333	3.18207	3.50365	0.590668	11.8882	11.4748	3.0085	1.14072	0.189948	0.528047	-0.277327	0.277327	0.733499	-0.447132	0.087418	-1.0584	1.0584	0.643013	-0.63708	0.0569396	-1.24459	1.24459
KAG1366531	A0A8B7CWP6	AT5G64260	#N/A	protein EXORDIUM-like 2	21.7	25.5	23.5	23.5667	112.3	133.8	140.7	128.933	76.8	67.6	74.1	72.8333	1.62241	12.0942	3.8612	6.88435	9.38017	5.30142	5.471	2.45181	0.00545971	-2.26283	2.26283	3.09052	1.62785	0.00593219	-2.22679	2.22679	0.564891	-0.823955	0.032099	-1.49351	1.49351
KAG1368683	A0A8B7BV63	AT3G04780	#N/A	PITH domain-containing protein	26.7	23.4	23.4	24.5	17.2	16.8	23	19	22.9	21	18.9	20.9333	3.18748	2.83314	1.63367	13.0101	14.9112	7.80417	0.77551	-0.366782	0.176963	-0.752118	0.752118	0.854422	-0.22698	0.0286765	-1.54247	1.54247	1.10175	0.139803	0.590716	-0.228621	0.228621
KAG1326743	A0A8B8J959	AT5G56260	MONOMER8I-2806	4-hydroxy-4-methyl-2-oxoglutarate aldolase	24.4	31.3	21.4	25.7	18.4	21	12.4	17.2667	14.9	18.2	24.5	19.2	3.973	3.60123	3.98246	15.4591	20.8566	20.742	0.671855	-0.573779	0.0220428	-1.65673	1.65673	0.747082	-0.420662	0.316697	-0.499355	0.499355	1.11197	0.153117	0.740486	-0.130483	0.130483
KAG1334208	A0A8B7C4W1	#N/A	EGU2211G0237-MONOMER	non-functional NADPH-dependent codeinone reductase 2	21.4	19.1	21.1	20.5333	20	12.1	14.3	15.4667	6.5	10.8	9.8	9.03333	1.8735	3.329	1.83727	9.12419	21.5237	20.3388	0.753247	-0.408806	0.109877	-0.959092	0.959092	0.439935	-1.18464	0.026437	-1.57779	1.57779	0.584052	-0.775832	0.220207	-0.657169	0.657169
KAG1335542	A0A8B7C5I3	AT1G52730	#N/A	serine-threonine kinase receptor-associated protein	16.1	18.4	20.9	18.4667	14.5	27.7	15	19.0667	23.5	20.2	34.5	26.0667	2.36461	6.1081	6.11356	12.8048	32.0355	23.4535	1.03249	0.0461292	0.906622	-0.0425739	0.0425739	1.41155	0.497283	0.155486	-0.808309	0.808309	1.36713	0.451153	0.467029	-0.330656	0.330656
KAG1327294	A0A8B7MX34	#N/A	MONOMER8I-2184	Glycerophosphodiester phosphodiesterase GDPDL3	15.9	22	20.6	19.5	25.5	18.6	24.7	22.9333	33.3	49.2	51.3	44.6	2.66583	3.08149	8.03617	13.6709	13.4367	18.0183	1.17607	0.233972	0.458337	-0.338815	0.338815	2.28718	1.19357	0.0242372	-1.61552	1.61552	1.94477	0.959598	0.0910895	-1.04053	1.04053
KAG1365102	A0A8B7BIU7	#N/A	#N/A	myosin-9	15	15.8	19.3	16.7	18.2	19.8	20.1	19.3667	12	9	12.7	11.2333	2.13905	0.834	1.60485	12.8087	4.30637	14.2865	1.15968	0.213728	0.109129	-0.962059	0.962059	0.672655	-0.572062	0.0474128	-1.3241	1.3241	0.580034	-0.78579	0.0275102	-1.56051	1.56051
KAG1338775	A0A8B7BLX1	AT5G49460	MONOMER8I-578	TP-citrate synthase beta chain protein 1	16.9	21.1	19.1	19.0333	18.4	13.8	11.5	14.5667	15.7	7.6	8.5	10.6	1.46969	2.8686	3.62491	7.72168	19.6929	34.1973	0.765324	-0.385857	0.273176	-0.563557	0.563557	0.556918	-0.844464	0.151059	-0.820853	0.820853	0.727689	-0.458607	0.0713039	-1.14689	1.14689
KAG1331303	A0A8B7C4R7	AT5G19150	EGU1685G1458-MONOMER	ATP-dependent (S)-NAD(P)H-hydrate dehydratase	20.3	17.5	18.5	18.7667	38.2	30.1	27.3	31.8667	24.9	21.2	21	22.3667	1.12101	4.62193	1.7932	5.97342	14.504	8.01727	1.69805	0.763876	0.0382628	-1.41722	1.41722	1.19183	0.253178	0.0273822	-1.56253	1.56253	0.701883	-0.510698	0.0432632	-1.36388	1.36388
KAG1362461	A0A8B7BR18	#N/A	EGU0139G0323-MONOMER	Carboxylesterase 1	18.9	20.4	17.8	19.0333	12.8	13	13.2	13	13.3	13.6	16.4	14.4333	2.94548	0.163299	1.39603	15.4754	1.25615	9.67224	0.683012	-0.550017	0.0175079	-1.75677	1.75677	0.758319	-0.399124	0.106754	-0.971616	0.971616	1.11026	0.150893	0.24631	-0.608519	0.608519
KAG1361928	A0A8B8ZRA3	#N/A	EGU2741G0001-MONOMER	putative amidase	24	14.3	17.7	18.6667	17.7	20.3	22	20	22.1	12.6	23.7	19.4667	4.30326	1.76824	4.89921	23.0532	8.84119	25.1672	1.07143	0.0995357	0.762031	-0.118027	0.118027	1.04286	0.0605415	0.787452	-0.103776	0.103776	0.973333	-0.0389941	0.8977	-0.0468686	0.0468686
KAG1338566	A0A8B8ZMW8	#N/A	EGU2621G1413-MONOMER	glucan endo-1,3-beta-glucosidase	10.5	12.8	14.8	12.7	29.1	19.3	24.5	24.3	23.7	21.4	23.9	23	2.98966	4.00333	1.13431	23.5406	16.4746	4.9318	1.91339	0.936128	0.0851287	-1.06992	1.06992	1.81102	0.856805	0.019433	-1.71146	1.71146	0.946502	-0.0793225	0.613444	-0.212225	0.212225
KAG1355216	A0A8B8ZQY6	AT5G22300	EGU0206G0736-MONOMER	hypothetical protein COCNU_07G013280	20	16.7	14.1	16.9333	14.4	12.1	9	11.8333	17.4	21.6	19.7	19.5667	2.63544	2.21259	1.71723	15.5636	18.6979	8.77632	0.698819	-0.517009	0.00318858	-2.4964	2.4964	1.15551	0.208532	0.42135	-0.375357	0.375357	1.65352	0.725541	0.0838123	-1.07669	1.07669
KAG1365761	A0A8B7BHJ6	AT2G28790	#N/A	osmotin-like protein	13.3	15.1	11.8	13.4	24.4	16.5	25.1	22	18.4	15.6	11.4	15.1333	1.34588	3.89957	2.87673	10.0439	17.7253	19.0092	1.64179	0.715271	0.142938	-0.844854	0.844854	1.12935	0.175497	0.415915	-0.380996	0.380996	0.687879	-0.539774	0.206223	-0.685663	0.685663
KAG1342664	A0A8B7CF57	AT2G44310	#N/A	Recoverin family protein	12.2	11	11.7	11.6333	70.4	76.7	101.2	82.7667	150.5	122.6	136.8	136.633	3.55657	13.2857	11.3907	30.5722	16.052	8.33672	7.11461	2.83079	0.0171422	-1.76593	1.76593	11.745	3.55397	0.00378069	-2.42243	2.42243	1.65083	0.723188	0.0570571	-1.24369	1.24369
KAG1327233	A0A8B8ZKA5	#N/A	#N/A	11 kDa late embryogenesis abundant protein	2.8	6.1	5.7	4.86667	20.6	26.6	29.5	25.5667	175	166.2	193.1	178.1	1.47045	3.70615	11.1985	30.2147	14.496	6.28777	5.25342	2.39326	0.00695151	-2.15792	2.15792	36.5959	5.19361	0.00207201	-2.68361	2.68361	6.9661	2.80035	0.0020939	-2.67904	2.67904

## Sheet: Core
KAG1347739	#N/A
AYJ721721	AT1G13440
KAG1362604	AT2G36530
KAG1363372	AT2G36460
KAG1368674	#N/A
KAG1365105	AT1G79550
KAG1360659	AT5G51970
KAG1369965	AT1G21750
KAG1366505	AT1G35720
KAG1327655	#N/A
KAG1330568	AT1G70730
KAG1326198	AT4G16155
AIL287561	AT5G08370
KAG1359409	AT2G16600
KAG1365376	AT1G11840
KAG1359637	AT5G23950
KAG1331212	AT1G77120
KAG1365594	AT1G09780
sp	#N/A
KAG1339294	AT3G55440
KAG1366377	AT3G43190
KAG1328064	AT1G72160
KAG1362117	AT4G09320
KAG1364388	AT1G16030
KAG1365307	AT1G09210
AFI578431	AT1G13440
KAG1337991	AT5G60390
KAG1337875	AT2G28930
KAG1326805	AT1G76550
KAG1333893	AT5G06390
KAG1331530	AT4G13940
KAG1348090	AT5G42740
KAG1339211	AT3G12580
KAG1330548	AT3G02520
KAG1358741	AT5G38480
KAG1367723	AT5G52920
AKS268491	#N/A
KAG1334538	AT2G22240
KAG1330289	AT3G14940
KAG1330584	AT2G01140
KAG1346182	AT5G55190
KAG1327231	AT2G05990
KAG1359544	AT5G08570
KAG1354750	AT4G22670
KAG1361553	AT5G43330
KAG1363572	AT5G13420
KAG1359148	AT1G01090
KAG1365116	AT1G16300
KAG1347700	AT3G22960
KAG1334572	#N/A
KAG1361551	#N/A
KAG1342609	#N/A
KAG1331790	#N/A
KAG1339074	AT2G40170
KAG1347827	AT5G15490
KAG1364013	AT1G12000
KAG1369984	AT1G77120
KAG1359722	AT3G24170
KAG1360972	AT3G51260
KAG1348103	AT4G14960
KAG1346418	AT4G33070
KAG1346710	AT1G65980
KAG1355122	AT5G42020
KAG1361301	AT3G48990
KAG1363330	AT4G34200
KAG1371245	#N/A
KAG1335211	#N/A
KAG1338955	#N/A
KAG1342580	AT3G43190
KAG1364380	AT2G24200
KAG1366389	AT1G72330
KAG1359660	AT2G28000
AHN532021	AT3G15730
KAG1371174	AT2G41530
KAG1366388	AT3G14290
KAG1347934	#N/A
KAG1361262	AT5G42020
KAG1358889	AT5G49910
KAG1339061	AT5G54960
KAG1365525	AT2G40980
KAG1362214	AT4G12400
KAG1360773	AT5G52640
KAG1367917	AT1G53310
KAG1346722	AT5G11520
KAG1361204	AT1G16470
KAG1367826	AT1G56070
KAG1326127	AT1G48030
KAG1370270	AT1G47980
KAG1331267	AT3G03080
KAG1334460	AT3G47520
KAG1335361	AT5G25880
KAG1334072	AT3G52990
KAG1334357	AT1G60420
KAG1337780	AT1G51740
KAG1331211	AT1G77120
KAG1366840	#N/A
KAG1368612	#N/A
KAG1338567	#N/A
KAG1327899	AT3G22110
KAG1365790	AT5G59420
KAG1368731	AT3G12780
KAG1359512	AT5G17310
KAG1341882	AT4G39260
KAG1354533	AT5G09590
KAG1370010	AT1G09830
KAG1331616	AT5G13420
KAG1358718	AT1G24360
KAG1342017	#N/A
KAG1334586	AT1G78300
KAG1346747	AT1G26480
KAG1346573	#N/A
KAG1338334	AT5G12250
KAG1339069	AT5G58590
KAG1358676	AT3G03960
KAG1366376	#N/A
KAG1338052	AT2G30110
KAG1369845	AT5G10160
KAG1326959	AT1G74030
KAG1328294	AT1G56450
KAG1354513	AT4G36195
KAG1333968	AT4G14880
KAG1361520	#N/A
KAG1330142	AT5G56600
KAG1366587	AT4G24620
KAG1347593	AT5G19780
KAG1366243	AT5G40370
KAG1342695	AT1G48430
KAG1365739	AT5G59840
KAG1337863	AT2G37660
KAG1331528	AT4G13930
KAG1338031	AT5G58590
KAG1346405	AT1G51710
KAG1361846	AT2G20420
KAG1331467	AT5G41670
KAG1326122	AT3G62250
KAG1358700	AT1G66430
KAG1347051	AT3G04880
KAG1369674	AT3G54250
KAG1361405	AT5G03340
KAG1347737	AT3G22630
KAG1360756	AT2G45290
KAG1346394	AT5G56730
KAG1334399	AT1G72330
KAG1334365	AT5G20720
KAG1330986	AT1G66240
KAG1348254	#N/A
KAG1338030	AT3G11130
KAG1360647	AT3G13470
ABM530281	AT5G56600
KAG1365496	AT1G14980
KAG1334341	AT1G54100
KAG1365102	#N/A
KAG1338775	AT5G49460
KAG1331303	AT5G19150
KAG1342664	AT2G44310

## Sheet: Only MPT
KAG1338083
KAG1371648
KAG1363715
KAG1364539
KAG1368697
KAG1339150
KAG1367678
KAG1371259
KAG1331573
KAG1359707
KAG1360757
KAG1370202
KAG1371480
AOX129841
KAG1358926
KAG1330065
KAG1326274
KAG1359664
KAG1337976
KAG1363442
KAG1346596
KAG1361822
KAG1331437
KAG1362055
KAG1327809
KAG1331666
KAG1326619
KAG1368351
KAG1330666
KAG1358590
KAG1339186
KAG1342335
KAG1331899
KAG1346642
KAG1326685
KAG1368796
KAG1331723
KAG1331384
KAG1338421
KAG1362598
KAG1326242
KAG1331902
KAG1366211
KAG1365456
KAG1354647
KAG1331254
KAG1368092
KAG1368115
KAG1369957
KAG1364462
KAG1364211
KAG1331567
KAG1326363
KAG1335189
KAG1365125
KAG1354068
KAG1337891
KAG1368669
KAG1326076
KAG1362494
KAG1359173
KAG1361131
KAG1364280
KAG1330550
KAG1327951
KAG1358666
KAG1338919
KAG1331684
KAG1362738
KAG1363281
KAG1366332
KAG1368445
KAG1334769
KAG1347005
KAG1328219
KAG1359481
KAG1366287
KAG1359074
KAG1326977
KAG1326211
KAG1334920
KAG1355091
KAG1338596
KAG1327973
KAG1359282
KAG1362825
KAG1368069
KAG1337959
KAG1330078
KAG1334542
KAG1368086
KAG1346558
KAG1347868
KAG1363274
KAG1346440
KAG1331841
KAG1326208
KAG1348205
KAG1326316
KAG1363891
KAG1337752
KAG1338829
KAG1363428
KAG1338034
KAG1335246
KAG1364226
KAG1365216
KAG1348100
KAG1330165
KAG1354450
KAG1326903
KAG1347360
KAG1346985
KAG1359199
KAG1360604
BAV824681
KAG1326808
KAG1328058
KAG1354273
KAG1334406
KAG1360826
KAG1326601
KAG1330929
KAG1366758
KAG1366283
KAG1331325
KAG1330110
KAG1338889
KAG1330463
KAG1364298
KAG1363228
KAG1334647
KAG1331349
KAG1365868
KAG1366608
KAG1366739
KAG1338888
AQT256741
KAG1358818
KAG1359006
KAG1354798
KAG1361157
KAG1355209
KAG1361999
KAG1339182
KAG1327749
KAG1342481
KAG1330429
KAG1363943
KAG1337931
KAG1362559
KAG1360753
KAG1361971
KAG1359490
KAG1371564
KAG1355350
KAG1361180
KAG1342031
KAG1335204
KAG1361947
KAG1326205
KAG1342451
KAG1346448
KAG1365168
KAG1371059
KAG1365839
KAG1361144
KAG1354077
KAG1367844
KAG1365455
KAG1327702
KAG1355160
KAG1328244
KAG1368308
KAG1359479
KAG1335243
KAG1327445
KAG1359597
KAG1366787
KAG1327383
KAG1366531
KAG1368683
KAG1326743
KAG1334208
KAG1335542
KAG1327294
KAG1362461
KAG1361928
KAG1338566
KAG1355216
KAG1365761
KAG1327233

## Sheet: only YGP
AYJ721691
KAG1346346
KAG1333928
KAG1338865
KAG1365762
KAG1342718
KAG1341863
KAG1371593
KAG1331543
KAG1348050
KAG1354979
KAG1363839
KAG1354807
KAG1332010
KAG1371182
KAG1331157
KAG1342757
KAG1334861
KAG1362599
KAG1365260
KAG1330847
KAG1327345
KAG1331004
KAG1342370
KAG1360603
KAG1366541
KAG1371609
KAG1371185
KAG1346442
KAG1361280
KAG1337826
KAG1365286
KAG1366850
KAG1359711
KAG1326248
KAG1338411
KAG1366726
KAG1347423
KAG1330482
KAG1353916
KAG1337905
KAG1366442
KAG1327862
KAG1371705
KAG1359700
KAG1362254
KAG1331638
KAG1339070
KAG1326559
KAG1347914
KAG1334533
KAG1358849
KAG1371668
KAG1346614
KAG1354429
KAG1342164
KAG1370006
KAG1331986
KAG1364407
prf
KAG1360793
KAG1360578
KAG1367867
KAG1365227
KAG1332017
KAG1364107
KAG1339141
KAG1338328
KAG1355334
KAG1326426
KAG1364214
KAG1369861
KAG1346258
KAG1342149
AZZ091721
KAG1342465
KAG1358603
KAG1346966
KAG1326542
KAG1342196
AGS434741
KAG1362164
KAG1359095
KAG1346424
KAG1353917
KAG1371238
KAG1353972
KAG1326696
KAG1369923
